# Supplementary material for: The potential habitat of desert locusts is contracting: predictions under climate change scenarios
Source: PeerJ. 2021 Oct 26;9:e12311. doi: 10.7717/peerj.12311 (PMC8555501; doi:10.7717/peerj.12311)
Supplement: Supplemental Information 1 — Occurrence data after cleaning and the final sample data used for modeling. [file peerj-09-12311-s001.xlsx]

## Sheet: Raw occurrence data
ID	SPECIES	lon	lat
1	Desert Locust	-16.0711	17.2575
2	Desert Locust	-15.5481	17.5094
3	Desert Locust	37.7275	18.4261
4	Desert Locust	37.3333	19.3167
5	Desert Locust	37.3333	19.3167
6	Desert Locust	37.35	19.2333
7	Desert Locust	-11.4136	18.5239
8	Desert Locust	-12.4328	18.4033
9	Desert Locust	-15.2525	16.9861
10	Desert Locust	-14.8361	17.1178
11	Desert Locust	-13.4983	17.4872
12	Desert Locust	-14.6747	18.1189
13	Desert Locust	-14.6781	17.985
14	Desert Locust	-14.6228	17.9256
15	Desert Locust	-14.7428	17.9922
16	Desert Locust	-15.3508	17.4586
17	Desert Locust	47.4167	11.15
18	Desert Locust	72.2667	27.5333
19	Desert Locust	69.7	24.6667
20	Desert Locust	-9.61667	16.6667
21	Desert Locust	-11.1667	19
22	Desert Locust	-13.5	17.5
23	Desert Locust	-14.8	17.2
24	Desert Locust	47	15
25	Desert Locust	61.7833	25.05
26	Desert Locust	64.45	28.2
27	Desert Locust	66.5	27.3667
28	Desert Locust	64.9833	28.5167
29	Desert Locust	-12.6639	18.2853
30	Desert Locust	-10.3839	15.4661
31	Desert Locust	-9.43722	16.6064
32	Desert Locust	-9.39389	16.5725
33	Desert Locust	1.185	20.2672
34	Desert Locust	1.07056	20.5539
35	Desert Locust	1.06917	20.7589
36	Desert Locust	2.3	19.9667
37	Desert Locust	71.0667	27.3833
38	Desert Locust	70.8	27.6667
39	Desert Locust	70.7	27.7833
40	Desert Locust	70.4	27.8667
41	Desert Locust	70.3667	28.8
42	Desert Locust	71.4167	27.1
43	Desert Locust	71.0667	27.3833
44	Desert Locust	71.8333	27.5167
45	Desert Locust	72.1667	29.0667
46	Desert Locust	66.7333	25.5167
47	Desert Locust	66.75	25.3
48	Desert Locust	66.7333	25.4667
49	Desert Locust	66.9167	25.3
50	Desert Locust	66.9667	25.2167
51	Desert Locust	66.6	25.55
52	Desert Locust	69.75	25.5
53	Desert Locust	69.8333	24.9667
54	Desert Locust	66.1667	25.6167
55	Desert Locust	66.4167	25.55
56	Desert Locust	66.75	25.25
57	Desert Locust	66.0667	25.6667
58	Desert Locust	66.8167	25.4167
59	Desert Locust	66.75	25.6667
60	Desert Locust	35.9167	18.2833
61	Desert Locust	38.75	16.4667
62	Desert Locust	38.75	16.4667
63	Desert Locust	-15.7992	16.1981
64	Desert Locust	-6.45306	15.2153
65	Desert Locust	-0.40423	20.3722
66	Desert Locust	1.25333	19.6836
67	Desert Locust	1.41778	19.8056
68	Desert Locust	3.83583	18.2217
69	Desert Locust	7.85972	18.7769
70	Desert Locust	8.41778	19.8817
71	Desert Locust	-8.30222	17.0206
72	Desert Locust	49.1833	11.2833
73	Desert Locust	49.1667	11.2833
74	Desert Locust	48.7728	10.2139
75	Desert Locust	39.8167	21.4333
76	Desert Locust	40.35	21.25
77	Desert Locust	71.6667	27.7667
78	Desert Locust	71.6667	27.7667
79	Desert Locust	71.6667	27.7667
80	Desert Locust	71.6833	27.7667
81	Desert Locust	-15.4339	16.6047
82	Desert Locust	-12.585	22.64
83	Desert Locust	-12.3964	20.4014
84	Desert Locust	-13.7558	18.8089
85	Desert Locust	-14.2483	18.7861
86	Desert Locust	-13.6786	17.9786
87	Desert Locust	-11.0833	17.6667
88	Desert Locust	-9.61667	16.6667
89	Desert Locust	72.7	28.1
90	Desert Locust	71.8833	27.85
91	Desert Locust	71.8333	27.0833
92	Desert Locust	69.6	27.7667
93	Desert Locust	69.75	27.4833
94	Desert Locust	-16.1008	16.8883
95	Desert Locust	-16.2936	16.6378
96	Desert Locust	-16.0322	16.6161
97	Desert Locust	-15.8344	16.4683
98	Desert Locust	-15.3144	16.5633
99	Desert Locust	-14.2775	16.6478
100	Desert Locust	-15.7489	16.6556
101	Desert Locust	-15.5944	16.6836
102	Desert Locust	43.45	10.9833
103	Desert Locust	43.4667	11.2
104	Desert Locust	-14.8028	17.7792
105	Desert Locust	-14.7881	17.7731
106	Desert Locust	-15.6347	18.1272
107	Desert Locust	-14.0369	18.2019
108	Desert Locust	27.6667	27.75
109	Desert Locust	44.7167	13.8
110	Desert Locust	38.0833	18.4167
111	Desert Locust	25.55	14.1333
112	Desert Locust	71.4167	25.7167
113	Desert Locust	72.4833	27.1833
114	Desert Locust	71.5333	26.95
115	Desert Locust	71.5833	26.85
116	Desert Locust	72.4833	27.1833
117	Desert Locust	71.2667	27.2833
118	Desert Locust	72.7	28.1
119	Desert Locust	71.5	25.0667
120	Desert Locust	66.7833	25.6333
121	Desert Locust	66.6333	25.6167
122	Desert Locust	66.9167	25.9833
123	Desert Locust	69.9667	25.1667
124	Desert Locust	70.5833	25.0333
125	Desert Locust	70.6667	24.35
126	Desert Locust	70.0333	27.7667
127	Desert Locust	66.4	25.55
128	Desert Locust	66.7	25.5333
129	Desert Locust	66.7833	25.6333
130	Desert Locust	69.7333	25.45
131	Desert Locust	30.3167	17.9
132	Desert Locust	0.966667	19.8667
133	Desert Locust	-9.61667	16.6667
134	Desert Locust	-10.6167	13.4333
135	Desert Locust	35.9167	18.2833
136	Desert Locust	38.75	16.4667
137	Desert Locust	43.6	10.75
138	Desert Locust	6.47528	18.0561
139	Desert Locust	6.59611	18.0506
140	Desert Locust	7.50944	18.7172
141	Desert Locust	7.80333	18.5219
142	Desert Locust	37.7333	18.4167
143	Desert Locust	36.8	18.6167
144	Desert Locust	36.8	18.6167
145	Desert Locust	1.475	20.9467
146	Desert Locust	3.81611	16.9003
147	Desert Locust	6.04028	17.3881
148	Desert Locust	7.90194	18.6186
149	Desert Locust	-15.7847	18.1036
150	Desert Locust	-15.7847	18.1036
151	Desert Locust	71.75	27.3667
152	Desert Locust	70.6667	25.6333
153	Desert Locust	69.7333	27.4833
154	Desert Locust	69.9333	27.9667
155	Desert Locust	70	27.6333
156	Desert Locust	68.85	26.8333
157	Desert Locust	72.1667	29.0667
158	Desert Locust	71.4167	28.3333
159	Desert Locust	71.6833	28.1
160	Desert Locust	71.9667	28.2
161	Desert Locust	71.1	27.2167
162	Desert Locust	72.8167	27.0667
163	Desert Locust	71.2667	27.2833
164	Desert Locust	-14.2847	18.9036
165	Desert Locust	-13.9575	18.7875
166	Desert Locust	-11.8817	18.4533
167	Desert Locust	-11.8833	18.46
168	Desert Locust	-11.0839	17.6383
169	Desert Locust	-10.5242	15.4422
170	Desert Locust	-9.57972	16.6158
171	Desert Locust	-9.57194	16.6067
172	Desert Locust	-9.57194	16.6067
173	Desert Locust	24.4333	18.5833
174	Desert Locust	24.4833	14.2167
175	Desert Locust	35.9167	18.2833
176	Desert Locust	44.1322	17.4917
177	Desert Locust	37.9167	18.4167
178	Desert Locust	37.4	19
179	Desert Locust	37.4	19
180	Desert Locust	37.4	19
181	Desert Locust	37.3	19.1167
182	Desert Locust	37.3	19.4
183	Desert Locust	-7.35222	17.8789
184	Desert Locust	-0.58883	19.2161
185	Desert Locust	-0.39251	19.0272
186	Desert Locust	1.43111	19.0364
187	Desert Locust	1.48444	18.5997
188	Desert Locust	1.77222	18.6697
189	Desert Locust	2.25611	18.6106
190	Desert Locust	0.97129	19.5256
191	Desert Locust	72.7833	28.1
192	Desert Locust	72.8	28.5167
193	Desert Locust	71.9167	25.4
194	Desert Locust	72.8	28.5167
195	Desert Locust	72.3	27.5333
196	Desert Locust	72.6833	28.4
197	Desert Locust	70.9167	27.6167
198	Desert Locust	69.75	26.1667
199	Desert Locust	69.8333	26.0833
200	Desert Locust	70.0833	26.4167
201	Desert Locust	70.05	26.3333
202	Desert Locust	70.0333	26.1
203	Desert Locust	70.25	25.1667
204	Desert Locust	69.75	25.9167
205	Desert Locust	69.8333	26.1667
206	Desert Locust	69.75	25.8833
207	Desert Locust	47.15	10.7
208	Desert Locust	-0.833333	18.8333
209	Desert Locust	1.16667	19.9167
210	Desert Locust	-14.2667	16.5833
211	Desert Locust	-15.95	18.1
212	Desert Locust	-11.0636	17.6656
213	Desert Locust	-11.0636	17.6656
214	Desert Locust	-10.3283	16.8556
215	Desert Locust	-13.2589	17.7786
216	Desert Locust	-14.7808	17.7894
217	Desert Locust	-15.5858	17.5394
218	Desert Locust	-15.2342	16.9922
219	Desert Locust	-11.9508	17.9522
220	Desert Locust	-14.3036	18.1775
221	Desert Locust	-14.2969	17.7233
222	Desert Locust	-14.6475	17.9347
223	Desert Locust	71.8667	27.85
224	Desert Locust	72.0167	27.7833
225	Desert Locust	72.0333	28.7833
226	Desert Locust	72.0333	27.7167
227	Desert Locust	72.7833	28.1
228	Desert Locust	72.4333	27.65
229	Desert Locust	71.9833	27.9333
230	Desert Locust	71.5333	26.95
231	Desert Locust	40.75	20.15
232	Desert Locust	-14.0333	12.9167
233	Desert Locust	-14.1333	18.9167
234	Desert Locust	70.5167	27.75
235	Desert Locust	70.9667	27.7667
236	Desert Locust	70.2667	25.15
237	Desert Locust	70.7	25.6667
238	Desert Locust	70.7	25.65
239	Desert Locust	69.8833	24.8167
240	Desert Locust	70.7667	24.55
241	Desert Locust	70.3667	24.6667
242	Desert Locust	-11.2417	20.3208
243	Desert Locust	-12.7094	22.0461
244	Desert Locust	-0.41298	20.3614
245	Desert Locust	1.24472	19.69
246	Desert Locust	2.28417	19.7342
247	Desert Locust	-14.05	18.6667
248	Desert Locust	1.16667	19.0333
249	Desert Locust	1.76667	19.05
250	Desert Locust	1.91667	19.55
251	Desert Locust	2.08333	19.05
252	Desert Locust	2.11667	19.3
253	Desert Locust	1.91667	19.55
254	Desert Locust	1.75	19.7
255	Desert Locust	7.75	18.75
256	Desert Locust	5.88333	17.4167
257	Desert Locust	2	18.5
258	Desert Locust	-15.6833	17.4167
259	Desert Locust	7.75	18.75
260	Desert Locust	5.88333	17.4167
261	Desert Locust	2.11667	20
262	Desert Locust	2.36667	19.8333
263	Desert Locust	-1.4	18.4333
264	Desert Locust	43.85	10.7667
265	Desert Locust	44.2667	10.2833
266	Desert Locust	44.3333	10.25
267	Desert Locust	44.3333	10.25
268	Desert Locust	40.75	20.15
269	Desert Locust	6.42528	26.5794
270	Desert Locust	-13.8731	18.9356
271	Desert Locust	-13.8483	18.8708
272	Desert Locust	-13.4464	18.2708
273	Desert Locust	-13.7928	17.0886
274	Desert Locust	-9.32778	16.7831
275	Desert Locust	-15.7903	18.0653
276	Desert Locust	-15.6822	18.0339
277	Desert Locust	-16.3089	16.4806
278	Desert Locust	-14.0708	16.6617
279	Desert Locust	-15.2167	16.9333
280	Desert Locust	0.9	18.6667
281	Desert Locust	1.43333	18.75
282	Desert Locust	-14.3167	16.65
283	Desert Locust	-14.4167	16.65
284	Desert Locust	2.91667	17.5833
285	Desert Locust	-14.7	16.6833
286	Desert Locust	-14.95	16.6667
287	Desert Locust	-14.9	16.75
288	Desert Locust	-14.85	18
289	Desert Locust	-15.3333	16.8333
290	Desert Locust	-15.8167	16.5
291	Desert Locust	-15.1833	17.8167
292	Desert Locust	-15.0333	14.5
293	Desert Locust	-14.85	18
294	Desert Locust	-15.95	18.1
295	Desert Locust	-15.1	18.5333
296	Desert Locust	-11.0833	17.6667
297	Desert Locust	-12	18
298	Desert Locust	-12	18
299	Desert Locust	6.53333	18.0333
300	Desert Locust	5.38333	18.0333
301	Desert Locust	7.41667	18.7167
302	Desert Locust	5.75	18.75
303	Desert Locust	-14.85	18
304	Desert Locust	-14.85	18
305	Desert Locust	-14.95	18.1833
306	Desert Locust	-15.1333	18.3167
307	Desert Locust	-15.3333	16.8333
308	Desert Locust	-14.9	18.4167
309	Desert Locust	41.4833	20.0333
310	Desert Locust	43.5667	15.4833
311	Desert Locust	72.2833	27.4333
312	Desert Locust	71.1333	25.5167
313	Desert Locust	72.7833	28.1
314	Desert Locust	72.7081	28.1
315	Desert Locust	71.5167	27
316	Desert Locust	72.7	28.1
317	Desert Locust	72.7	28.1
318	Desert Locust	72.8333	29.0167
319	Desert Locust	71.4167	28.3333
320	Desert Locust	71.9333	28.2167
321	Desert Locust	27.6667	27.75
322	Desert Locust	70.2833	28.3333
323	Desert Locust	66.6	25.55
324	Desert Locust	69.6	24.4667
325	Desert Locust	69.75	24.8333
326	Desert Locust	70.25	25.1
327	Desert Locust	-16.25	15.7167
328	Desert Locust	5.75	18.75
329	Desert Locust	-13.8333	18.9667
330	Desert Locust	-9.61667	16.6667
331	Desert Locust	-14.85	18
332	Desert Locust	37.8333	18.4167
333	Desert Locust	43.1453	11.5942
334	Desert Locust	42.0833	11.3333
335	Desert Locust	2.3	19.9667
336	Desert Locust	-10.35	15.5
337	Desert Locust	-10.75	15.5333
338	Desert Locust	69.7833	26.1167
339	Desert Locust	40.1667	20.1667
340	Desert Locust	39.7	20.8333
341	Desert Locust	39.7	20.8333
342	Desert Locust	35.9333	27.9167
343	Desert Locust	39.35	21.9247
344	Desert Locust	39.3167	22.15
345	Desert Locust	44.6333	10.3833
346	Desert Locust	35.9167	18.2833
347	Desert Locust	-15.3128	16.6864
348	Desert Locust	-14.8964	16.7669
349	Desert Locust	-14.9133	16.8694
350	Desert Locust	-15.1264	17.0019
351	Desert Locust	-15.4042	16.9481
352	Desert Locust	-15.1914	16.9706
353	Desert Locust	-15.1097	16.9708
354	Desert Locust	-15.0622	16.8342
355	Desert Locust	-14.5589	17.4658
356	Desert Locust	-14.5367	17.6475
357	Desert Locust	-14.2892	17.6825
358	Desert Locust	-14.2881	17.6828
359	Desert Locust	-14.6761	18.0069
360	Desert Locust	-13.7814	17.9861
361	Desert Locust	-12.9031	18.3967
362	Desert Locust	-12.8578	18.6367
363	Desert Locust	71.9167	28.2167
364	Desert Locust	71.9167	28.4333
365	Desert Locust	70.0333	26.3167
366	Desert Locust	5.75	18.75
367	Desert Locust	2.48333	20.8167
368	Desert Locust	2.08333	20.4833
369	Desert Locust	1.96667	20.7833
370	Desert Locust	2.3	20.6167
371	Desert Locust	2.56667	20.3333
372	Desert Locust	-15.25	16.8333
373	Desert Locust	-15.3333	16.8333
374	Desert Locust	-15.5	16.6667
375	Desert Locust	-15.4167	16.9167
376	Desert Locust	-14.85	16.75
377	Desert Locust	-14.9167	16.8333
378	Desert Locust	-15.4167	16.9167
379	Desert Locust	3.79167	18.1603
380	Desert Locust	2.09139	17.7081
381	Desert Locust	5.71917	18.7794
382	Desert Locust	6.49028	18.05
383	Desert Locust	6.59333	18.0517
384	Desert Locust	24.4	14.5833
385	Desert Locust	35.9167	18.2833
386	Desert Locust	1.08278	19.7769
387	Desert Locust	1.35667	19.9111
388	Desert Locust	6.04028	17.3881
389	Desert Locust	7.90194	18.6186
390	Desert Locust	5.90528	18.6836
391	Desert Locust	70.0667	27.5833
392	Desert Locust	69.9167	27
393	Desert Locust	69.8833	27.4167
394	Desert Locust	69.35	27.0333
395	Desert Locust	71.3333	28.4167
396	Desert Locust	71.9167	28.1667
397	Desert Locust	71.6833	28.1
398	Desert Locust	62	25.5
399	Desert Locust	61.8667	25.4333
400	Desert Locust	-3	13
401	Desert Locust	-15.4333	17.3167
402	Desert Locust	-15.5	17.2333
403	Desert Locust	-15.2333	16.9167
404	Desert Locust	39.1731	21.5436
405	Desert Locust	39.1731	21.5436
406	Desert Locust	39.8167	21.4333
407	Desert Locust	40.35	21.25
408	Desert Locust	43.9333	10.5333
409	Desert Locust	44.2667	10.2833
410	Desert Locust	44.4333	10.4
411	Desert Locust	42.1667	17
412	Desert Locust	41.4833	20.0333
413	Desert Locust	43.0167	15.3333
414	Desert Locust	43	15.7333
415	Desert Locust	72.25	27.5667
416	Desert Locust	72.7	28.1
417	Desert Locust	74.25	28.45
418	Desert Locust	-15.0967	16.9086
419	Desert Locust	-14.8161	17.0133
420	Desert Locust	-15.8219	16.5383
421	Desert Locust	-15.5939	16.5817
422	Desert Locust	-15.5744	16.4417
423	Desert Locust	-15.5806	16.4417
424	Desert Locust	-0.40423	20.3722
425	Desert Locust	1.25333	19.6836
426	Desert Locust	48.3	15.8333
427	Desert Locust	2.27444	19.0453
428	Desert Locust	2.35306	19.2739
429	Desert Locust	2.02694	19.5428
430	Desert Locust	1.14833	19.7919
431	Desert Locust	2.02306	19.0644
432	Desert Locust	25.55	14.5833
433	Desert Locust	7.91667	19.6333
434	Desert Locust	7.56667	19.7167
435	Desert Locust	7.75	18.8333
436	Desert Locust	70.7	27.6667
437	Desert Locust	71.2667	27.2833
438	Desert Locust	71.2667	27.2833
439	Desert Locust	71.0667	27.3833
440	Desert Locust	72.7833	28.1
441	Desert Locust	72.8	28.5167
442	Desert Locust	72.9167	27.6667
443	Desert Locust	72.8	28.5167
444	Desert Locust	70.7	25.6667
445	Desert Locust	70.85	24.9667
446	Desert Locust	-1.4	18.4333
447	Desert Locust	6.5	19
448	Desert Locust	-7.4	19.5167
449	Desert Locust	8.33333	19.9167
450	Desert Locust	-14.05	18.6667
451	Desert Locust	5.75	18.75
452	Desert Locust	5.75	18.75
453	Desert Locust	5.75	18.75
454	Desert Locust	8.1	19.6667
455	Desert Locust	7.76667	18.9833
456	Desert Locust	7.31667	18.5167
457	Desert Locust	-13.4467	18.2056
458	Desert Locust	-11.9639	17.9139
459	Desert Locust	-8.85472	16.7267
460	Desert Locust	6.43056	18.7597
461	Desert Locust	5.27278	18.255
462	Desert Locust	5.27278	18.255
463	Desert Locust	5.27278	18.255
464	Desert Locust	4.52611	17.7581
465	Desert Locust	44.4167	12.9667
466	Desert Locust	44.5	13
467	Desert Locust	44.3131	12.9806
468	Desert Locust	44.3333	10.2219
469	Desert Locust	44.3333	10.2308
470	Desert Locust	44.3333	10.24
471	Desert Locust	2.47139	19.5078
472	Desert Locust	2.86806	20.3039
473	Desert Locust	2.84028	20.4606
474	Desert Locust	2.575	20.5036
475	Desert Locust	2.33111	20.4094
476	Desert Locust	2.18306	20.6594
477	Desert Locust	2.72806	20.7469
478	Desert Locust	4.17611	17.4658
479	Desert Locust	5.325	18.3808
480	Desert Locust	-15.4667	16.5833
481	Desert Locust	-15.5167	16.6333
482	Desert Locust	-15.3333	16.8333
483	Desert Locust	-15.1333	16.5333
484	Desert Locust	-15.5	16.6667
485	Desert Locust	-10.6167	13.4333
486	Desert Locust	72.4167	29.75
487	Desert Locust	2.5	20.5
488	Desert Locust	-15.1667	16.9167
489	Desert Locust	-15.4167	17.0833
490	Desert Locust	-15.5	16.6667
491	Desert Locust	-15.3333	16.8333
492	Desert Locust	-15.8167	16.5
493	Desert Locust	-15.2333	16.9167
494	Desert Locust	-15.0833	16.9167
495	Desert Locust	-9.61667	16.6667
496	Desert Locust	-15.3333	16.8333
497	Desert Locust	69.6	24.4667
498	Desert Locust	70.0667	24.9667
499	Desert Locust	70.25	25.1
500	Desert Locust	70.3667	24.6667
501	Desert Locust	70.4667	24.8
502	Desert Locust	70.5833	25.0333
503	Desert Locust	69.5	25.7667
504	Desert Locust	69.7667	25.9667
505	Desert Locust	70.2833	28.3333
506	Desert Locust	72.7833	28.1
507	Desert Locust	72.8167	28.0667
508	Desert Locust	71.9167	27.1333
509	Desert Locust	39.05	22.45
510	Desert Locust	38.7667	25.9333
511	Desert Locust	39.035	22.8036
512	Desert Locust	38.5833	23.6667
513	Desert Locust	38.0667	24.1167
514	Desert Locust	43.1453	11.5942
515	Desert Locust	-15.3333	16.8333
516	Desert Locust	-15.5	16.6667
517	Desert Locust	-14.8	17.9333
518	Desert Locust	-14.85	17.9167
519	Desert Locust	5.5	18.1167
520	Desert Locust	-11.9711	17.9719
521	Desert Locust	-15.2122	16.6478
522	Desert Locust	-15.1106	16.8933
523	Desert Locust	3.01472	17.5025
524	Desert Locust	4.27111	18.3528
525	Desert Locust	4.13917	18.6311
526	Desert Locust	5.17056	18.2967
527	Desert Locust	5.90528	18.6836
528	Desert Locust	5.76972	18.0889
529	Desert Locust	7.97528	18.6053
530	Desert Locust	1.08611	18.6783
531	Desert Locust	1.13083	18.6269
532	Desert Locust	49.0333	10.6333
533	Desert Locust	71.5333	26.95
534	Desert Locust	-15.0167	16.8675
535	Desert Locust	-12.8553	16.5861
536	Desert Locust	5.9675	18.7136
537	Desert Locust	-15.1619	19.3242
538	Desert Locust	-13.795	19.6044
539	Desert Locust	-13.4614	19.7181
540	Desert Locust	-14.4139	18.9117
541	Desert Locust	-13.735	18.8092
542	Desert Locust	-13.8564	18.6233
543	Desert Locust	-15.1461	16.9211
544	Desert Locust	-15.2433	16.9075
545	Desert Locust	-9.53556	16.6308
546	Desert Locust	-10.3872	15.5025
547	Desert Locust	-10.4647	14.3733
548	Desert Locust	-10.4511	13.4567
549	Desert Locust	-0.4164	18.5583
550	Desert Locust	64.75	26.9167
551	Desert Locust	65.0333	27.0667
552	Desert Locust	65.5833	27.8333
553	Desert Locust	65.4	26.95
554	Desert Locust	67.3333	25.2333
555	Desert Locust	67.3667	25.2
556	Desert Locust	66.6333	25.25
557	Desert Locust	65.8833	26.25
558	Desert Locust	-9.57083	16.6397
559	Desert Locust	37.7333	18.4167
560	Desert Locust	37.6833	18.4
561	Desert Locust	37.6833	18.3667
562	Desert Locust	37.7	18.3333
563	Desert Locust	37.75	18.3333
564	Desert Locust	36.25	18.75
565	Desert Locust	35.5	14.5
566	Desert Locust	44.3333	10.25
567	Desert Locust	44.3333	10.25
568	Desert Locust	44.3333	10.25
569	Desert Locust	44.3333	10.25
570	Desert Locust	44.3333	10.25
571	Desert Locust	44.3333	10.25
572	Desert Locust	44.3333	10.2042
573	Desert Locust	44.3333	10.2136
574	Desert Locust	2.06	19.7444
575	Desert Locust	2.405	19.8114
576	Desert Locust	2.35972	19.96
577	Desert Locust	2.66333	19.8
578	Desert Locust	2.52972	19.7228
579	Desert Locust	2.58333	19.5936
580	Desert Locust	37.4	19
581	Desert Locust	69.75	24.8333
582	Desert Locust	69.8333	27.6
583	Desert Locust	71.6	28.6667
584	Desert Locust	72.0167	28.1333
585	Desert Locust	71.9667	28.4333
586	Desert Locust	71.1	28.0167
587	Desert Locust	72.15	29.0167
588	Desert Locust	44.4167	10.3833
589	Desert Locust	44.3167	10.15
590	Desert Locust	24.4	14.5833
591	Desert Locust	25.55	14.1333
592	Desert Locust	24.65	14.2167
593	Desert Locust	35.9167	18.2833
594	Desert Locust	38.75	16.4667
595	Desert Locust	72.7833	28.1
596	Desert Locust	70.8	27.6667
597	Desert Locust	-15.5	18.1667
598	Desert Locust	-14.85	18
599	Desert Locust	-13.7667	18.6167
600	Desert Locust	5.5	18.1167
601	Desert Locust	44.7167	10.4
602	Desert Locust	-14.57	17.9481
603	Desert Locust	46	10.2
604	Desert Locust	-15.9164	16.7117
605	Desert Locust	-16.0867	16.5622
606	Desert Locust	-15.9186	15.9886
607	Desert Locust	-15.4933	16.5008
608	Desert Locust	-15.3219	16.47
609	Desert Locust	-15.275	16.5728
610	Desert Locust	-15.1553	16.4528
611	Desert Locust	-15.1192	16.7033
612	Desert Locust	71.6833	28.1
613	Desert Locust	71.3333	28.4167
614	Desert Locust	70.5	28.1
615	Desert Locust	71.6833	28.1
616	Desert Locust	71.9167	28.4333
617	Desert Locust	72.4167	29.75
618	Desert Locust	71.6833	27.8667
619	Desert Locust	-9.61667	16.6667
620	Desert Locust	-15.6833	17.4167
621	Desert Locust	-15.4667	17.25
622	Desert Locust	-15.7	17.6667
623	Desert Locust	65.5833	29.6
624	Desert Locust	66.6333	25.25
625	Desert Locust	66.7333	25.1167
626	Desert Locust	66.6333	25.5333
627	Desert Locust	43.3	11.4167
628	Desert Locust	43.45	10.9833
629	Desert Locust	43.8833	10.7
630	Desert Locust	70.8	27.6667
631	Desert Locust	-14.2936	18.6236
632	Desert Locust	-14.9611	18.3236
633	Desert Locust	-15.1458	18.4081
634	Desert Locust	-15.4431	18.0081
635	Desert Locust	66	28.3
636	Desert Locust	-12.7533	17.6419
637	Desert Locust	-12.5039	17.8206
638	Desert Locust	-10.8419	17.6761
639	Desert Locust	-9.32778	16.7831
640	Desert Locust	-9.33667	16.8478
641	Desert Locust	-7.85722	17.0811
642	Desert Locust	-0.37518	19.4467
643	Desert Locust	70.2167	28.0167
644	Desert Locust	70.5167	27.75
645	Desert Locust	70.6333	28.2333
646	Desert Locust	66.9667	25.2167
647	Desert Locust	66.9167	25.3
648	Desert Locust	66.6	25.55
649	Desert Locust	69.6	25.55
650	Desert Locust	69.6167	25.9
651	Desert Locust	-10.5833	15.4667
652	Desert Locust	-10.35	15.5
653	Desert Locust	-10.75	15.5333
654	Desert Locust	-10.5833	15.4667
655	Desert Locust	-15.25	16.9167
656	Desert Locust	-9.61667	16.6667
657	Desert Locust	-15.4167	17.25
658	Desert Locust	-15.4	16.0833
659	Desert Locust	-15.3333	16.8333
660	Desert Locust	-16.05	16.5833
661	Desert Locust	-15.0333	16.7
662	Desert Locust	-15.5	16.75
663	Desert Locust	71.4167	28.3333
664	Desert Locust	71.9167	28.4167
665	Desert Locust	64.6167	25.2833
666	Desert Locust	63.0833	25.4667
667	Desert Locust	61.7833	25.05
668	Desert Locust	6.31667	26.65
669	Desert Locust	40.95	19.4667
670	Desert Locust	39.8167	21.4333
671	Desert Locust	39.1731	21.5436
672	Desert Locust	39.1333	21.9333
673	Desert Locust	40.35	21.25
674	Desert Locust	41.5	19.25
675	Desert Locust	42.0167	17.7333
676	Desert Locust	71.3833	27.7667
677	Desert Locust	71.9333	26.4
678	Desert Locust	70.6667	26.7667
679	Desert Locust	71.9333	26.4667
680	Desert Locust	70.9167	27.6167
681	Desert Locust	71.3833	27.7667
682	Desert Locust	-14.8017	16.7433
683	Desert Locust	-14.5536	16.745
684	Desert Locust	-14.2242	16.6469
685	Desert Locust	-14.0728	16.6258
686	Desert Locust	-14.0922	16.6258
687	Desert Locust	-13.7656	16.3528
688	Desert Locust	-13.7928	17.0886
689	Desert Locust	-14.7122	17.6014
690	Desert Locust	1.24333	18.7181
691	Desert Locust	4.52611	17.7581
692	Desert Locust	4.52611	17.7581
693	Desert Locust	5.36833	17.2303
694	Desert Locust	5.36833	17.2303
695	Desert Locust	5.36833	17.2181
696	Desert Locust	7.13694	18.1092
697	Desert Locust	7.13694	18.1092
698	Desert Locust	7.13694	18.1092
699	Desert Locust	-16.1772	15.8139
700	Desert Locust	44.6333	12.9833
701	Desert Locust	44.4167	12.9667
702	Desert Locust	44.5	13
703	Desert Locust	37.8667	18.5
704	Desert Locust	37.8667	18.5
705	Desert Locust	37.85	18.4667
706	Desert Locust	38.75	16.4667
707	Desert Locust	39.1731	21.5436
708	Desert Locust	8.02917	18.1947
709	Desert Locust	7.49556	18.515
710	Desert Locust	7.85361	18.9025
711	Desert Locust	8.38361	20.4536
712	Desert Locust	-14.5461	17.9444
713	Desert Locust	-15.055	16.8661
714	Desert Locust	66.4	26.7167
715	Desert Locust	67.3667	25.2
716	Desert Locust	66.0833	25.5167
717	Desert Locust	67.3667	25.2
718	Desert Locust	-15.8022	17.9972
719	Desert Locust	-15.8886	17.3511
720	Desert Locust	0.41275	19.5664
721	Desert Locust	1.13389	19.7322
722	Desert Locust	1.02083	18.895
723	Desert Locust	0.91933	18.4289
724	Desert Locust	2.12917	19.0172
725	Desert Locust	1.20444	20.2311
726	Desert Locust	1.07528	20.4864
727	Desert Locust	1.08278	20.6936
728	Desert Locust	1.4875	20.8786
729	Desert Locust	71.9333	26.4667
730	Desert Locust	71.8833	26.6833
731	Desert Locust	71.0667	27.3833
732	Desert Locust	-14.9442	16.9569
733	Desert Locust	-15.0022	16.9383
734	Desert Locust	-15.1775	16.6472
735	Desert Locust	-14.8478	16.6619
736	Desert Locust	-14.8036	16.7986
737	Desert Locust	-14.705	16.7425
738	Desert Locust	-14.81	16.7825
739	Desert Locust	-14.6175	16.6208
740	Desert Locust	-14.9553	16.6892
741	Desert Locust	-14.8072	16.9867
742	Desert Locust	63.5333	26.85
743	Desert Locust	66.3167	27.3333
744	Desert Locust	66.6333	25.5333
745	Desert Locust	66.7333	25.1167
746	Desert Locust	64.75	26.8667
747	Desert Locust	-13.8333	18.9667
748	Desert Locust	-8.15	17.0667
749	Desert Locust	-13.9833	17.1167
750	Desert Locust	-12.7833	17.8333
751	Desert Locust	-12.75	17.75
752	Desert Locust	6.38333	18.9167
753	Desert Locust	-13	17.7167
754	Desert Locust	-8.86667	16.7667
755	Desert Locust	-8.28333	17.0333
756	Desert Locust	-12.48	22.7
757	Desert Locust	-13.8667	17.9833
758	Desert Locust	-15.8	16.25
759	Desert Locust	4.66667	18.8333
760	Desert Locust	2.3	19.9667
761	Desert Locust	2.3	19.75
762	Desert Locust	-0.8	19.2833
763	Desert Locust	-0.65	19.1833
764	Desert Locust	-13.9	18.05
765	Desert Locust	69.7833	25.8333
766	Desert Locust	38.75	16.2
767	Desert Locust	46.15	13.8833
768	Desert Locust	25.55	14.1333
769	Desert Locust	35.9167	18.2833
770	Desert Locust	38.75	16.4667
771	Desert Locust	38.3833	17.9667
772	Desert Locust	-0.49835	19.7078
773	Desert Locust	-0.07109	19.7239
774	Desert Locust	0.91159	18.7336
775	Desert Locust	0.99348	18.8981
776	Desert Locust	1.07972	18.6514
777	Desert Locust	1.15028	18.6514
778	Desert Locust	1.22806	18.7189
779	Desert Locust	-15.5	16.6667
780	Desert Locust	-15.4167	16.9167
781	Desert Locust	70.4167	25.2833
782	Desert Locust	69.8333	27.5833
783	Desert Locust	69.8	27.5
784	Desert Locust	71.3333	28.75
785	Desert Locust	71.4167	28.3333
786	Desert Locust	71.6833	28.1
787	Desert Locust	71.9333	28.2167
788	Desert Locust	71.9167	28.4167
789	Desert Locust	71.9167	28.4333
790	Desert Locust	-15.7847	18.1036
791	Desert Locust	39.8167	21.4333
792	Desert Locust	71.95	27.5833
793	Desert Locust	70.2167	25.85
794	Desert Locust	-15.6	17.5333
795	Desert Locust	-15.6667	17.4167
796	Desert Locust	-15.3333	16.8333
797	Desert Locust	-15.5	16.6667
798	Desert Locust	69.7667	25.9667
799	Desert Locust	70.0167	26.0833
800	Desert Locust	70.0333	26.3167
801	Desert Locust	69.8	26.0167
802	Desert Locust	69.5	27.3667
803	Desert Locust	69.8	27.5
804	Desert Locust	71.6833	28.1
805	Desert Locust	-15.3667	16.5833
806	Desert Locust	-15.3333	16.8333
807	Desert Locust	-15.8167	16.5
808	Desert Locust	-15.3333	16.8333
809	Desert Locust	64.5833	27.9167
810	Desert Locust	64.6333	26.8333
811	Desert Locust	65.5167	27.5167
812	Desert Locust	65.7833	29.3
813	Desert Locust	66.5833	25.8
814	Desert Locust	66.6333	25.25
815	Desert Locust	69.9333	24.3
816	Desert Locust	70.5167	25.45
817	Desert Locust	56.45	23.65
818	Desert Locust	71.5333	27.75
819	Desert Locust	71.2667	26.4833
820	Desert Locust	72.7833	28.1
821	Desert Locust	35.9167	18.2833
822	Desert Locust	39.9	20.65
823	Desert Locust	47.1167	11
824	Desert Locust	43.2333	11.1333
825	Desert Locust	48.5833	11.2833
826	Desert Locust	-15.3667	16.5833
827	Desert Locust	3.83583	18.2217
828	Desert Locust	-12.7094	22.0461
829	Desert Locust	-0.413056	20.3614
830	Desert Locust	1.24472	19.69
831	Desert Locust	1.93333	17.4
832	Desert Locust	2.13333	17.6
833	Desert Locust	2.03333	17.6833
834	Desert Locust	2.18333	17.4167
835	Desert Locust	2.3	17.6
836	Desert Locust	7.35	18.35
837	Desert Locust	7.35	18.35
838	Desert Locust	2.33333	17.3667
839	Desert Locust	70.2833	28.3333
840	Desert Locust	70.9167	27.75
841	Desert Locust	70.8333	27.8333
842	Desert Locust	70.0833	27.7667
843	Desert Locust	0.9	20.3167
844	Desert Locust	1.75	19.7
845	Desert Locust	-0.05	16.2667
846	Desert Locust	1.86667	17.5333
847	Desert Locust	2.01667	18.5
848	Desert Locust	66.5833	25.5833
849	Desert Locust	66.5833	25.4167
850	Desert Locust	66.75	25.6667
851	Desert Locust	70.9167	25.0833
852	Desert Locust	70.8833	24.8667
853	Desert Locust	70.9833	24.8333
854	Desert Locust	69.8833	24.8167
855	Desert Locust	70.75	24.5167
856	Desert Locust	69.2	24.3333
857	Desert Locust	69.2167	26.9333
858	Desert Locust	68.8833	26.8667
859	Desert Locust	68.8	26.8667
860	Desert Locust	68.7833	26.8333
861	Desert Locust	68.7167	26.7667
862	Desert Locust	2.1	17.3833
863	Desert Locust	2.98333	17.3667
864	Desert Locust	2.13333	17.5
865	Desert Locust	-8.25	29.3833
866	Desert Locust	-8.26667	29.3333
867	Desert Locust	-5.8	30.3833
868	Desert Locust	8.28333	19.1333
869	Desert Locust	8.35	19.15
870	Desert Locust	2.13333	17.4333
871	Desert Locust	2.33333	17.5
872	Desert Locust	2.13333	17.5667
873	Desert Locust	2	17.4667
874	Desert Locust	-9.71667	29.7167
875	Desert Locust	2.16667	17.5667
876	Desert Locust	9.95	24.0667
877	Desert Locust	9.75	24.0667
878	Desert Locust	3	17.8333
879	Desert Locust	36.5	15.2333
880	Desert Locust	36.5333	15.2333
881	Desert Locust	36.5333	15.35
882	Desert Locust	36.3	15.3667
883	Desert Locust	36.25	18.75
884	Desert Locust	32.1167	13.8167
885	Desert Locust	32.0167	15.95
886	Desert Locust	31.6667	14.2333
887	Desert Locust	25.4833	13.3333
888	Desert Locust	36.7167	18.7833
889	Desert Locust	36.7	18.7333
890	Desert Locust	36.9833	18.5333
891	Desert Locust	36.7833	18.65
892	Desert Locust	25.5	11.5
893	Desert Locust	37.4833	18.7333
894	Desert Locust	37.2833	19.1333
895	Desert Locust	38.5211	17.3175
896	Desert Locust	38.75	16.2
897	Desert Locust	38.75	16.2
898	Desert Locust	36.5833	14.25
899	Desert Locust	35.6667	27.35
900	Desert Locust	-4.83722	15.0283
901	Desert Locust	0.00824	19.2964
902	Desert Locust	1.3975	19.9058
903	Desert Locust	1.44972	18.7586
904	Desert Locust	2.195	19.3561
905	Desert Locust	2.48417	19.1789
906	Desert Locust	6.11472	19.2908
907	Desert Locust	6.26417	19.1367
908	Desert Locust	6.18194	18.9919
909	Desert Locust	6.31444	19.0283
910	Desert Locust	6.3975	18.9703
911	Desert Locust	6.24	17.7031
912	Desert Locust	6.69222	17.6158
913	Desert Locust	7.86056	19.2514
914	Desert Locust	7.91333	19.2728
915	Desert Locust	1.99167	17.7314
916	Desert Locust	2.04528	17.6825
917	Desert Locust	1.81694	17.4972
918	Desert Locust	1.87444	17.5339
919	Desert Locust	1.91417	17.4689
920	Desert Locust	1.90111	17.4794
921	Desert Locust	1.93917	17.3944
922	Desert Locust	4.66667	18.8333
923	Desert Locust	8.5	18
924	Desert Locust	73.05	27.95
925	Desert Locust	72.3833	28.3
926	Desert Locust	72.95	28.2167
927	Desert Locust	35.7033	31.18
928	Desert Locust	66.6333	25.6167
929	Desert Locust	66.6333	25.55
930	Desert Locust	67.1667	26.2667
931	Desert Locust	65.8167	25.4167
932	Desert Locust	67.3333	25.6167
933	Desert Locust	66.0833	25.5167
934	Desert Locust	39.035	22.8036
935	Desert Locust	40.35	21.25
936	Desert Locust	39.6	24.4667
937	Desert Locust	39.25	22.8833
938	Desert Locust	48.4089	11.1167
939	Desert Locust	48.4181	11.1167
940	Desert Locust	48.4367	11.1167
941	Desert Locust	48.9058	11.1167
942	Desert Locust	49.0056	11.1167
943	Desert Locust	49.0142	11.1167
944	Desert Locust	49.0233	11.1167
945	Desert Locust	49.0189	11.1167
946	Desert Locust	49.0422	11.1167
947	Desert Locust	4.2875	17.5789
948	Desert Locust	4.12417	17.5797
949	Desert Locust	5.16	17.9856
950	Desert Locust	5.16	17.9858
951	Desert Locust	5.89083	19.0594
952	Desert Locust	5.90306	19.0633
953	Desert Locust	5.82139	19.1172
954	Desert Locust	5.83917	19.1186
955	Desert Locust	5.83944	19.1194
956	Desert Locust	5.83944	19.1194
957	Desert Locust	5.86667	19.1964
958	Desert Locust	36.5733	28.3903
959	Desert Locust	62.85	25.5333
960	Desert Locust	65.3	29.9167
961	Desert Locust	62.7333	28.3667
962	Desert Locust	64.1667	27.3667
963	Desert Locust	66.0833	25.2167
964	Desert Locust	46.5167	23.6167
965	Desert Locust	42.5497	16.8919
966	Desert Locust	-15.1667	16.8333
967	Desert Locust	6.79722	18.7042
968	Desert Locust	6.80472	18.5844
969	Desert Locust	5.82139	18.0878
970	Desert Locust	5.80861	17.7894
971	Desert Locust	44.1833	10.2667
972	Desert Locust	44.6667	10.2167
973	Desert Locust	45.5833	10.3167
974	Desert Locust	45.6	10.7167
975	Desert Locust	-7.64306	28.8394
976	Desert Locust	-7.64444	28.8406
977	Desert Locust	-7.64417	28.8394
978	Desert Locust	8.86889	24.4769
979	Desert Locust	9.97556	23.7931
980	Desert Locust	10.0689	23.8094
981	Desert Locust	8.38528	19.5119
982	Desert Locust	8.31472	19.1633
983	Desert Locust	45.5667	10.55
984	Desert Locust	8.19028	19.6692
985	Desert Locust	-12.6164	17.8411
986	Desert Locust	-12.0111	17.2339
987	Desert Locust	-12.7122	15.9269
988	Desert Locust	-14.9833	18.2167
989	Desert Locust	-14.7	18.0333
990	Desert Locust	-9.55	16.4
991	Desert Locust	-8.63333	16.5667
992	Desert Locust	-15.5833	16.9833
993	Desert Locust	8.16667	18.8667
994	Desert Locust	8.35	18.5167
995	Desert Locust	-9.55	16.2
996	Desert Locust	-15.5167	16.8
997	Desert Locust	-15.3167	16.8833
998	Desert Locust	-12.55	17.8333
999	Desert Locust	-8.35	16.2667
1000	Desert Locust	-8.36667	16.3833
1001	Desert Locust	6.53333	16.8667
1002	Desert Locust	6.53333	17.2667
1003	Desert Locust	-11.05	16.65
1004	Desert Locust	-15.0667	12.0583
1005	Desert Locust	-11.9167	18.0667
1006	Desert Locust	-15.1167	17.175
1007	Desert Locust	-11.6333	18.2667
1008	Desert Locust	-15.1	17.0667
1009	Desert Locust	-11.2667	16.7833
1010	Desert Locust	-10.15	16.2667
1011	Desert Locust	6.2	18.1833
1012	Desert Locust	-13.7333	19.8
1013	Desert Locust	-10.125	17.1583
1014	Desert Locust	-10.1	17.45
1015	Desert Locust	-10.1333	17.4667
1016	Desert Locust	-10.225	17.3917
1017	Desert Locust	-11.3167	17.35
1018	Desert Locust	-10.2667	17.375
1019	Desert Locust	-10.25	17.4
1020	Desert Locust	-11.4167	18.3667
1021	Desert Locust	-10.4667	17.3833
1022	Desert Locust	-10.4667	17.3
1023	Desert Locust	-9.91667	16.85
1024	Desert Locust	-14.9333	18.2333
1025	Desert Locust	-14.8667	18.2833
1026	Desert Locust	58.665	23.5267
1027	Desert Locust	-11.0667	17.55
1028	Desert Locust	-7.66667	17.1667
1029	Desert Locust	-14.7333	18.2842
1030	Desert Locust	-14.8667	18.2833
1031	Desert Locust	-9.01667	16.6333
1032	Desert Locust	-14.7	18.475
1033	Desert Locust	7.83333	19.4667
1034	Desert Locust	5.63333	18.2333
1035	Desert Locust	-11.0333	16.8333
1036	Desert Locust	-8.63333	16.6
1037	Desert Locust	-14.6667	18.5
1038	Desert Locust	-14.6167	18.5167
1039	Desert Locust	8.98333	17.7833
1040	Desert Locust	54.1667	17.3333
1041	Desert Locust	57.75	23.6667
1042	Desert Locust	-6.76667	17.25
1043	Desert Locust	-8.81667	16.9833
1044	Desert Locust	58.1167	22.5
1045	Desert Locust	57.75	23.6667
1046	Desert Locust	59.2564	22.4006
1047	Desert Locust	59.25	21.5667
1048	Desert Locust	55.9833	24.0167
1049	Desert Locust	58.1667	22.8333
1050	Desert Locust	55.7392	23.3831
1051	Desert Locust	57.6203	23.7469
1052	Desert Locust	56.6964	24.3867
1053	Desert Locust	56.7	24.3167
1054	Desert Locust	56.1	22.9
1055	Desert Locust	56.6833	22.7333
1056	Desert Locust	59.7031	22.2256
1057	Desert Locust	56.4667	21.9667
1058	Desert Locust	-6.58333	17.0167
1059	Desert Locust	-12.9667	21.3333
1060	Desert Locust	41.05	-1.71667
1061	Desert Locust	41.05	-1.03333
1062	Desert Locust	57.2817	23.1178
1063	Desert Locust	57.5	22.3833
1064	Desert Locust	57.9619	23.6886
1065	Desert Locust	57.2525	23.7656
1066	Desert Locust	56.75	24.3667
1067	Desert Locust	57.9833	23.6833
1068	Desert Locust	57.2525	23.7656
1069	Desert Locust	56.5425	18.1597
1070	Desert Locust	58.9167	21.9333
1071	Desert Locust	57.2817	23.1178
1072	Desert Locust	57.9167	21.7833
1073	Desert Locust	57.9208	23.3039
1074	Desert Locust	6.31667	17.6167
1075	Desert Locust	58.5469	22.6903
1076	Desert Locust	57.6667	24.8
1077	Desert Locust	6.15	17.45
1078	Desert Locust	5.96667	17.4333
1079	Desert Locust	4.95	17.5333
1080	Desert Locust	7.66667	18.0167
1081	Desert Locust	6.68333	19.0333
1082	Desert Locust	6.9	19.4667
1083	Desert Locust	63.7483	25.3875
1084	Desert Locust	64.6333	26.8333
1085	Desert Locust	64.0833	26.05
1086	Desert Locust	65.55	25.4833
1087	Desert Locust	63.6833	26.2
1088	Desert Locust	63.7333	25.4
1089	Desert Locust	70.6333	27.6833
1090	Desert Locust	71.75	28.8833
1091	Desert Locust	69.4333	27.0667
1092	Desert Locust	66.1833	25.6167
1093	Desert Locust	64.9	26.1167
1094	Desert Locust	63.0167	27.8833
1095	Desert Locust	62.5	26.4167
1096	Desert Locust	66.6333	25.5333
1097	Desert Locust	70.25	25.3333
1098	Desert Locust	66.9333	25.5167
1099	Desert Locust	45.5	14.9667
1100	Desert Locust	44.6167	16
1101	Desert Locust	45.3336	15.4211
1102	Desert Locust	44.2094	15.3614
1103	Desert Locust	44.3925	14.5503
1104	Desert Locust	42.8147	16.3225
1105	Desert Locust	70.2667	27.9667
1106	Desert Locust	71.2667	27.8667
1107	Desert Locust	69.8167	27.6167
1108	Desert Locust	70.0833	24.2167
1109	Desert Locust	66.7	25.9167
1110	Desert Locust	69.5667	27.6167
1111	Desert Locust	72.25	28.5
1112	Desert Locust	69.7333	23.8333
1113	Desert Locust	69.6625	23.2517
1114	Desert Locust	72.1333	26.35
1115	Desert Locust	-2.23333	15.3667
1116	Desert Locust	-1.71667	15.3167
1117	Desert Locust	-2.98333	15.9167
1118	Desert Locust	73.5667	27.1
1119	Desert Locust	69.7333	23.8333
1120	Desert Locust	2.45	16.95
1121	Desert Locust	-2.78333	16
1122	Desert Locust	-1.73333	16.1667
1123	Desert Locust	-3.11667	16.5
1124	Desert Locust	2.43333	16.8833
1125	Desert Locust	73.1667	28.3667
1126	Desert Locust	72.5167	27.3167
1127	Desert Locust	71.6	26.3333
1128	Desert Locust	72.4167	27.7333
1129	Desert Locust	70.9167	26.3667
1130	Desert Locust	73.45	28.0667
1131	Desert Locust	73.1	27.5
1132	Desert Locust	2.68333	19.7167
1133	Desert Locust	2.76667	16.8667
1134	Desert Locust	0.95	20.3
1135	Desert Locust	2.66667	19.65
1136	Desert Locust	3.1	17.75
1137	Desert Locust	2.2	17.6
1138	Desert Locust	1.01667	20.3333
1139	Desert Locust	2.7	19.85
1140	Desert Locust	70.6333	25.75
1141	Desert Locust	3.55	18.4167
1142	Desert Locust	1.1	17.8833
1143	Desert Locust	2.46667	17.3333
1144	Desert Locust	3.13333	17.2667
1145	Desert Locust	2.05	17.7
1146	Desert Locust	2.86667	17.5833
1147	Desert Locust	72.8667	28.1333
1148	Desert Locust	72.3333	27.3333
1149	Desert Locust	70.9128	26.9117
1150	Desert Locust	1.14889	27.8031
1151	Desert Locust	-0.16667	28.2167
1152	Desert Locust	5.18333	26.65
1153	Desert Locust	73.0167	29.1167
1154	Desert Locust	5	21
1155	Desert Locust	71.0608	25.4811
1156	Desert Locust	71.0667	27.3833
1157	Desert Locust	72.7167	28.0667
1158	Desert Locust	74.1667	28.95
1159	Desert Locust	70.9128	26.9117
1160	Desert Locust	72.8833	26.4167
1161	Desert Locust	72.3	28.35
1162	Desert Locust	73.0667	27.5333
1163	Desert Locust	71.9333	26.4667
1164	Desert Locust	72.7667	23.4667
1165	Desert Locust	72.25	27.5667
1166	Desert Locust	74.65	27.5
1167	Desert Locust	73.3	28.1333
1168	Desert Locust	73.3	28.1333
1169	Desert Locust	72.8064	28.5064
1170	Desert Locust	-13.5833	17.7333
1171	Desert Locust	-13.5333	17.5667
1172	Desert Locust	-13.45	17.4667
1173	Desert Locust	-13.1167	17.6667
1174	Desert Locust	-14.4	18.5833
1175	Desert Locust	-13.3	17.5667
1176	Desert Locust	-14.4667	18.5167
1177	Desert Locust	-14.6333	18.5
1178	Desert Locust	-14.0833	19.8833
1179	Desert Locust	-13.25	17.4833
1180	Desert Locust	-14.6167	18.5667
1181	Desert Locust	-13.1	17.5333
1182	Desert Locust	-13.7333	19.4667
1183	Desert Locust	-10.3167	17.25
1184	Desert Locust	-14.4	19.05
1185	Desert Locust	-10.35	17.4167
1186	Desert Locust	-13.9333	17.4
1187	Desert Locust	-13.0833	18.5833
1188	Desert Locust	-13.8167	17.6667
1189	Desert Locust	-13.6333	17.05
1190	Desert Locust	-13.1333	19.0833
1191	Desert Locust	-13.0833	19.1333
1192	Desert Locust	-13.85	17.7333
1193	Desert Locust	-12.8333	18.7
1194	Desert Locust	37.717	18.35
1195	Desert Locust	-14.1	18.6167
1196	Desert Locust	-14.2333	18.65
1197	Desert Locust	-14.4667	19.3333
1198	Desert Locust	-13.9833	18.8167
1199	Desert Locust	-13.7167	19.2
1200	Desert Locust	-14.6333	19.1167
1201	Desert Locust	-12.75	18.5
1202	Desert Locust	-13.2833	18.6
1203	Desert Locust	-13.85	17.4
1204	Desert Locust	-12.3333	20.5
1205	Desert Locust	-13.0333	18.5667
1206	Desert Locust	-13.4333	18.5667
1207	Desert Locust	-13.2333	18.9
1208	Desert Locust	-13.4167	18.9667
1209	Desert Locust	-13.25	19.0167
1210	Desert Locust	-13.6	18.9667
1211	Desert Locust	-13.7167	18.9333
1212	Desert Locust	-13.7833	18.9833
1213	Desert Locust	-12.933	18.367
1214	Desert Locust	72.15	27.75
1215	Desert Locust	39.75	21.333
1216	Desert Locust	44.367	12.75
1217	Desert Locust	6.05	17.333
1218	Desert Locust	40.167	20.5
1219	Desert Locust	20	15.783
1220	Desert Locust	21.117	15.967
1221	Desert Locust	17.417	15.033
1222	Desert Locust	43.35	14.283
1223	Desert Locust	42.867	15.267
1224	Desert Locust	37.283	19.133
1225	Desert Locust	23.75	15.067
1226	Desert Locust	35.633	20.133
1227	Desert Locust	37.65	18.383
1228	Desert Locust	-8.417	16.75
1229	Desert Locust	20	15.783
1230	Desert Locust	70.55	25.417
1231	Desert Locust	57.667	23.667
1232	Desert Locust	37.75	18.367
1233	Desert Locust	37.617	18.267
1234	Desert Locust	37.4	18.7
1235	Desert Locust	37.717	18.35
1236	Desert Locust	-14.767	19.767
1237	Desert Locust	-9.417	16.8
1238	Desert Locust	41.233	18.8
1239	Desert Locust	18	15.75
1240	Desert Locust	17.733	19.25
1241	Desert Locust	37.717	18.35
1242	Desert Locust	37.617	18.267
1243	Desert Locust	37.717	18.2
1244	Desert Locust	5.817	18.65
1245	Desert Locust	-9.917	17.133
1246	Desert Locust	36.45	22.333
1247	Desert Locust	73.767	28.35
1248	Desert Locust	38.367	17.883
1249	Desert Locust	38.367	17.867
1250	Desert Locust	38.85	16.4
1251	Desert Locust	-11.517	21.05
1252	Desert Locust	20.683	15.917
1253	Desert Locust	19.367	15.75
1254	Desert Locust	33.667	24.333
1255	Desert Locust	70.464	25.699
1256	Desert Locust	44.617	16
1257	Desert Locust	37.717	18.35
1258	Desert Locust	38.35	17.767
1259	Desert Locust	42.933	10.517
1260	Desert Locust	3.65	15.267
1261	Desert Locust	-14.317	19.8
1262	Desert Locust	-10.583	21.033
1263	Desert Locust	-6.75	17.3
1264	Desert Locust	20.7	15.767
1265	Desert Locust	17.217	14.417
1266	Desert Locust	44.2	12.967
1267	Desert Locust	37.717	18.35
1268	Desert Locust	23.25	15.1
1269	Desert Locust	7.983	16.967
1270	Desert Locust	-11.5	21.05
1271	Desert Locust	-11.6	18.333
1272	Desert Locust	-12.9	18.433
1273	Desert Locust	-7.417	16.883
1274	Desert Locust	17.5	17.583
1275	Desert Locust	20.25	15.733
1276	Desert Locust	39.183	15.9
1277	Desert Locust	74.15	27.95
1278	Desert Locust	43.3	14.683
1279	Desert Locust	38.35	17.733
1280	Desert Locust	4.017	14.833
1281	Desert Locust	17.367	14.85
1282	Desert Locust	35.367	23.017
1283	Desert Locust	40.583	20.167
1284	Desert Locust	42.967	15.05
1285	Desert Locust	25.367	13.617
1286	Desert Locust	7.983	16.967
1287	Desert Locust	-10.133	17.1
1288	Desert Locust	-0.233	27.883
1289	Desert Locust	20.9	15.905
1290	Desert Locust	46.717	13.517
1291	Desert Locust	7.983	16.967
1292	Desert Locust	-10.05	17.1
1293	Desert Locust	17.289	18.622
1294	Desert Locust	36.633	22.233
1295	Desert Locust	6.05	17.333
1296	Desert Locust	21.117	15.967
1297	Desert Locust	17.417	15.033
1298	Desert Locust	43.217	14.917
1299	Desert Locust	35.667	20.017
1300	Desert Locust	38.417	17.917
1301	Desert Locust	-11.933	23.2
1302	Desert Locust	-14.333	19.067
1303	Desert Locust	-8.5	16.833
1304	Desert Locust	-14.05	18.817
1305	Desert Locust	39.75	21.3333
1306	Desert Locust	40.3333	20.3333
1307	Desert Locust	39.5	15.333
1308	Desert Locust	37.733	18.333
1309	Desert Locust	37.717	18.35
1310	Desert Locust	39.233	15.767
1311	Desert Locust	-12.433	20.85
1312	Desert Locust	-12.183	18.567
1313	Desert Locust	-11.05	16.733
1314	Desert Locust	-15.533	17.733
1315	Desert Locust	41.5	19.167
1316	Desert Locust	20	15.783
1317	Desert Locust	17.033	20.45
1318	Desert Locust	66.183	25.617
1319	Desert Locust	43.283	13.9
1320	Desert Locust	37.683	18.333
1321	Desert Locust	36.05	21.367
1322	Desert Locust	37.4	18.7
1323	Desert Locust	37.717	18.35
1324	Desert Locust	-12.833	22.6
1325	Desert Locust	-14.417	19.767
1326	Desert Locust	39.133	21.917
1327	Desert Locust	38.35	17.8
1328	Desert Locust	6.067	17.633
1329	Desert Locust	-12.433	20.85
1330	Desert Locust	-9.667	16.95
1331	Desert Locust	-15.517	17.883
1332	Desert Locust	20.867	15.733
1333	Desert Locust	44.033	12.633
1334	Desert Locust	38.367	17.8
1335	Desert Locust	63.067	25.983
1336	Desert Locust	66.617	25.8
1337	Desert Locust	70.3	28.417
1338	Desert Locust	69.083	25.55
1339	Desert Locust	5.833	18.033
1340	Desert Locust	-13.483	20.183
1341	Desert Locust	-14.017	19.633
1342	Desert Locust	-13.2	21.117
1343	Desert Locust	-7.667	16.667
1344	Desert Locust	-7.267	17.333
1345	Desert Locust	-11.667	17.883
1346	Desert Locust	-9.05	16.933
1347	Desert Locust	-7.667	16.783
1348	Desert Locust	-11.417	17.167
1349	Desert Locust	-13.15	18.267
1350	Desert Locust	-12.533	17.65
1351	Desert Locust	-14.85	18
1352	Desert Locust	-15.7	16.933
1353	Desert Locust	10.2	31.733
1354	Desert Locust	71.65	27.117
1355	Desert Locust	72.917	27.833
1356	Desert Locust	66.6669	25.8
1357	Desert Locust	64.65	25.2
1358	Desert Locust	66.617	25.8
1359	Desert Locust	72.033	28.5
1360	Desert Locust	43	15.317
1361	Desert Locust	42.7	15.683
1362	Desert Locust	37.15	19.45
1363	Desert Locust	37.683	18.35
1364	Desert Locust	37.183	19.3
1365	Desert Locust	-0.05	16.3
1366	Desert Locust	-8.667	16.967
1367	Desert Locust	-11.183	17.167
1368	Desert Locust	-11.117	16.7
1369	Desert Locust	-13.033	18.35
1370	Desert Locust	-11.817	17.983
1371	Desert Locust	20.817	15.767
1372	Desert Locust	39.5	15.383
1373	Desert Locust	39.167	15.917
1374	Desert Locust	73.75	29.483
1375	Desert Locust	64.1	26.967
1376	Desert Locust	63.067	25.983
1377	Desert Locust	63.067	25.983
1378	Desert Locust	70.3	28.417
1379	Desert Locust	69.333	27.167
1380	Desert Locust	73.367	28.017
1381	Desert Locust	63.317	25.517
1382	Desert Locust	68.517	26.817
1383	Desert Locust	70.217	25.667
1384	Desert Locust	42.9669	16.2333
1385	Desert Locust	37.3	19.883
1386	Desert Locust	39.8333	21.4833
1387	Desert Locust	41	19.95
1388	Desert Locust	41.2833	18.95
1389	Desert Locust	74.95	28.3
1390	Desert Locust	63.067	25.983
1391	Desert Locust	71.683	29.4
1392	Desert Locust	70.017	27.583
1393	Desert Locust	70.2	26.1
1394	Desert Locust	69.917	25.55
1395	Desert Locust	-15.867	17.25
1396	Desert Locust	-14.25	17.433
1397	Desert Locust	22	27.75
1398	Desert Locust	6.25	26.833
1399	Desert Locust	37.767	18.333
1400	Desert Locust	37.75	18.333
1401	Desert Locust	38.367	17.683
1402	Desert Locust	6.083	17.467
1403	Desert Locust	-14.3	19.933
1404	Desert Locust	-14.383	19.4
1405	Desert Locust	-13.55	20.167
1406	Desert Locust	-9.633	17.333
1407	Desert Locust	-5.917	16.817
1408	Desert Locust	-7.5	16.867
1409	Desert Locust	-11.917	18.55
1410	Desert Locust	-11.2	16.7
1411	Desert Locust	-10.5	18.5
1412	Desert Locust	0.7	17.5
1413	Desert Locust	-15.583	23.55
1414	Desert Locust	-4.967	31.633
1415	Desert Locust	37.85	18.517
1416	Desert Locust	38.45	17.917
1417	Desert Locust	5.833	18.033
1418	Desert Locust	5.5	18.167
1419	Desert Locust	-14.017	19.633
1420	Desert Locust	-11.933	23.2
1421	Desert Locust	-12.433	21.133
1422	Desert Locust	-13.333	20.883
1423	Desert Locust	-6	17
1424	Desert Locust	-6.383	17.183
1425	Desert Locust	-12.3	17.95
1426	Desert Locust	-11.35	16.767
1427	Desert Locust	-13.133	17.717
1428	Desert Locust	-10.75	16.5
1429	Desert Locust	-12.933	18.383
1430	Desert Locust	-7.33306	16.8
1431	Desert Locust	-10.617	18.933
1432	Desert Locust	36.35	22.35
1433	Desert Locust	70.25	26.033
1434	Desert Locust	70.667	26.5
1435	Desert Locust	70.5	26.917
1436	Desert Locust	65.283	27.217
1437	Desert Locust	62.333	25.85
1438	Desert Locust	69.767	26.167
1439	Desert Locust	66.183	25.617
1440	Desert Locust	66.617	25.8
1441	Desert Locust	71.683	29.4
1442	Desert Locust	69.0831	25.55
1443	Desert Locust	70.9	26.917
1444	Desert Locust	62.317	25.117
1445	Desert Locust	63.467	25.267
1446	Desert Locust	71.2169	27.8669
1447	Desert Locust	71.383	25.75
1448	Desert Locust	70.9	26.917
1449	Desert Locust	73.3	28.017
1450	Desert Locust	72.617	26.983
1451	Desert Locust	64.233	26.033
1452	Desert Locust	64.533	26.467
1453	Desert Locust	67.25	25.883
1454	Desert Locust	71.383	28.067
1455	Desert Locust	38.35	17.917
1456	Desert Locust	37.783	18.333
1457	Desert Locust	37.7	18.367
1458	Desert Locust	71.683	29.4
1459	Desert Locust	68.9	27.7
1460	Desert Locust	69.083	25.55
1461	Desert Locust	73.367	28.017
1462	Desert Locust	63.067	25.983
1463	Desert Locust	69.083	25.55
1464	Desert Locust	6.117	18.3
1465	Desert Locust	-14.533	19.3
1466	Desert Locust	-11.833	22.333
1467	Desert Locust	-12.85	21.6
1468	Desert Locust	-12.433	20.85
1469	Desert Locust	-8.967	16.3
1470	Desert Locust	-7.333	17.333
1471	Desert Locust	-11.55	16.917
1472	Desert Locust	-11.983	17.817
1473	Desert Locust	-9.25	16.8
1474	Desert Locust	-11.383	17.033
1475	Desert Locust	-13.083	18.283
1476	Desert Locust	-14.033	18.617
1477	Desert Locust	-14.983	17.25
1478	Desert Locust	10.383	32.033
1479	Desert Locust	17.55	18.667
1480	Desert Locust	39.281	15.802
1481	Desert Locust	63.467	25.267
1482	Desert Locust	70.3	28.417
1483	Desert Locust	68.9	27.7
1484	Desert Locust	71.133	27.9
1485	Desert Locust	68.9	27.7
1486	Desert Locust	73.367	28.017
1487	Desert Locust	9.767	31.467
1488	Desert Locust	38.4	17.983
1489	Desert Locust	38.267	18.2
1490	Desert Locust	38.417	17.833
1491	Desert Locust	-14.3	19.9
1492	Desert Locust	-12.833	19.833
1493	Desert Locust	-8.75	16.967
1494	Desert Locust	-7.25	17.417
1495	Desert Locust	-12.033	17.067
1496	Desert Locust	-11.25	16.75
1497	Desert Locust	-13.2	17.917
1498	Desert Locust	-6.467	17.25
1499	Desert Locust	-14.517	17.667
1500	Desert Locust	39.117	16.5
1501	Desert Locust	74.283	25.65
1502	Desert Locust	70.9	26.917
1503	Desert Locust	73.733	28.5
1504	Desert Locust	70.567	26.867
1505	Desert Locust	61.783	25.533
1506	Desert Locust	62.217	25.883
1507	Desert Locust	70	25.733
1508	Desert Locust	43.383	14.517
1509	Desert Locust	37.367	19.117
1510	Desert Locust	37.75	18.383
1511	Desert Locust	38.383	17.85
1512	Desert Locust	6.05	17.333
1513	Desert Locust	-14.55	19.3
1514	Desert Locust	-8.367	17.133
1515	Desert Locust	-13.3	18.083
1516	Desert Locust	-6.75	17.05
1517	Desert Locust	-12.517	17.433
1518	Desert Locust	-13.1	17.5
1519	Desert Locust	-12.517	17.5
1520	Desert Locust	-13.1331	18.95
1521	Desert Locust	-6.917	16.8
1522	Desert Locust	-13.883	18.633
1523	Desert Locust	-8.167	16.25
1524	Desert Locust	-15.55	23.55
1525	Desert Locust	-4.083	32.317
1526	Desert Locust	72.8	28.517
1527	Desert Locust	73.183	27.367
1528	Desert Locust	72.3	27.5
1529	Desert Locust	71.783	27.033
1530	Desert Locust	63.133	25.45
1531	Desert Locust	63.383	26.65
1532	Desert Locust	70.75	24.517
1533	Desert Locust	70.2	26.1
1534	Desert Locust	58.5	23.25
1535	Desert Locust	44.4167	12.7
1536	Desert Locust	43.5	14.517
1537	Desert Locust	38.4	17.867
1538	Desert Locust	37.133	19.883
1539	Desert Locust	37.783	18.3
1540	Desert Locust	42.817	15.867
1541	Desert Locust	-7.383	17.067
1542	Desert Locust	-5.033	31.467
1543	Desert Locust	37.433	18.617
1544	Desert Locust	37.817	18.317
1545	Desert Locust	38.383	17.85
1546	Desert Locust	5.8	17.633
1547	Desert Locust	-8.417	16.667
1548	Desert Locust	-6.367	17.15
1549	Desert Locust	-7.033	17.3
1550	Desert Locust	-12.517	17.5
1551	Desert Locust	-13.1	17.533
1552	Desert Locust	-8.417	16.6
1553	Desert Locust	-12.667	17.383
1554	Desert Locust	-13.917	18.75
1555	Desert Locust	-6.5	16.833
1556	Desert Locust	-10.567	18.817
1557	Desert Locust	16.167	20.567
1558	Desert Locust	72.317	25.983
1559	Desert Locust	72.8	28.567
1560	Desert Locust	70.983	26.817
1561	Desert Locust	63.55	26.717
1562	Desert Locust	61.783	25.533
1563	Desert Locust	71.217	27.867
1564	Desert Locust	41.533	19.167
1565	Desert Locust	43.033	15.017
1566	Desert Locust	-8.067	16.967
1567	Desert Locust	-11.2	16.6
1568	Desert Locust	-13.917	18.817
1569	Desert Locust	-6.433	16.967
1570	Desert Locust	-13.633	18.783
1571	Desert Locust	-7.3	17.033
1572	Desert Locust	-12.85	18.383
1573	Desert Locust	-13.083	18.283
1574	Desert Locust	-15.633	23.4
1575	Desert Locust	-3.417	32.533
1576	Desert Locust	43.033	15.617
1577	Desert Locust	37.4	18.75
1578	Desert Locust	37.75	18.467
1579	Desert Locust	37.733	18.333
1580	Desert Locust	38.35	17.767
1581	Desert Locust	6.067	17.633
1582	Desert Locust	5.833	18.417
1583	Desert Locust	-12.883	21.8
1584	Desert Locust	-13.4831	20.1831
1585	Desert Locust	-6.317	17.1
1586	Desert Locust	-6.933	17.383
1587	Desert Locust	-12.483	17.567
1588	Desert Locust	-13.117	17.533
1589	Desert Locust	33.6669	25.2
1590	Desert Locust	72.317	25.583
1591	Desert Locust	72.8	28.517
1592	Desert Locust	72.017	26.6
1593	Desert Locust	70.183	26.7
1594	Desert Locust	64.217	26.05
1595	Desert Locust	65.6	26.5
1596	Desert Locust	72.667	28.967
1597	Desert Locust	66.617	25.8
1598	Desert Locust	63.467	25.267
1599	Desert Locust	64.1	26.967
1600	Desert Locust	66.6169	25.8
1601	Desert Locust	71.6831	29.4
1602	Desert Locust	70.9	26.917
1603	Desert Locust	74.95	28.3
1604	Desert Locust	64.1	26.967
1605	Desert Locust	68.9	27.7
1606	Desert Locust	70.033	26.15
1607	Desert Locust	71.683	29.4
1608	Desert Locust	68.9	27.7
1609	Desert Locust	73.367	28.017
1610	Desert Locust	39.067	15.867
1611	Desert Locust	10.117	25
1612	Desert Locust	-5.183	31.433
1613	Desert Locust	37.633	18.3
1614	Desert Locust	38.367	17.85
1615	Desert Locust	-13.617	20.2
1616	Desert Locust	-13.483	20.183
1617	Desert Locust	-9.5	17.417
1618	Desert Locust	-6.3	15.867
1619	Desert Locust	-7.317	17.167
1620	Desert Locust	-11.85	18.617
1621	Desert Locust	-11.55	16.983
1622	Desert Locust	-8.8	16.883
1623	Desert Locust	-11.45	17.317
1624	Desert Locust	-11.067	16.65
1625	Desert Locust	-13.033	18.3
1626	Desert Locust	-12.133	18.083
1627	Desert Locust	-15.917	16.967
1628	Desert Locust	71.5	24.75
1629	Desert Locust	73.883	28.383
1630	Desert Locust	66.75	25.25
1631	Desert Locust	70.6	25.5
1632	Desert Locust	43	15.733
1633	Desert Locust	37.033	19.95
1634	Desert Locust	36.883	18.633
1635	Desert Locust	37.8	18.383
1636	Desert Locust	66.617	25.8
1637	Desert Locust	71.683	29.4
1638	Desert Locust	70.9	26.917
1639	Desert Locust	62.317	25.117
1640	Desert Locust	69.083	25.55
1641	Desert Locust	10.367	32.25
1642	Desert Locust	37.683	18.35
1643	Desert Locust	-11.533	21.017
1644	Desert Locust	-12.8669	21.2669
1645	Desert Locust	-7.867	16.7
1646	Desert Locust	-7.167	17.5
1647	Desert Locust	-12.083	18.55
1648	Desert Locust	-11.983	17.817
1649	Desert Locust	-9.35	16.783
1650	Desert Locust	-7.5	16.75
1651	Desert Locust	-11.417	16.75
1652	Desert Locust	-13.867	17.333
1653	Desert Locust	-13.117	17.8
1654	Desert Locust	-8.667	16.967
1655	Desert Locust	-10.883	16.55
1656	Desert Locust	-11.55	18.35
1657	Desert Locust	-7.033	17.3
1658	Desert Locust	36.3	22.5
1659	Desert Locust	70.75	25.35
1660	Desert Locust	71.667	27.783
1661	Desert Locust	70.517	26.833
1662	Desert Locust	62.933	25.833
1663	Desert Locust	63.917	25.417
1664	Desert Locust	70.05	28
1665	Desert Locust	71.65	28.317
1666	Desert Locust	42.967	16.25
1667	Desert Locust	36.05	21.717
1668	Desert Locust	37.667	18.317
1669	Desert Locust	-13.217	18.083
1670	Desert Locust	-6.417	17.083
1671	Desert Locust	-14.5	17.567
1672	Desert Locust	39.183	16.211
1673	Desert Locust	72.317	25.983
1674	Desert Locust	70.367	26.65
1675	Desert Locust	66.95	25.55
1676	Desert Locust	64.783	26.933
1677	Desert Locust	71.217	27.867
1678	Desert Locust	69.083	25.55
1679	Desert Locust	70.383	25.733
1680	Desert Locust	43.117	16.017
1681	Desert Locust	37.283	19.133
1682	Desert Locust	37.3	19.4
1683	Desert Locust	66.6169	25.8
1684	Desert Locust	74.95	28.3
1685	Desert Locust	73.367	28.017
1686	Desert Locust	62.317	25.117
1687	Desert Locust	66.617	25.8
1688	Desert Locust	62.317	25.117
1689	Desert Locust	-1.233	32.1
1690	Desert Locust	-5.55	31.533
1691	Desert Locust	5.2	18.167
1692	Desert Locust	-14.517	19.317
1693	Desert Locust	-13.717	19.817
1694	Desert Locust	-13.1	18.3
1695	Desert Locust	-6.417	17.2
1696	Desert Locust	-7.95	16.6
1697	Desert Locust	66.617	25.8
1698	Desert Locust	62.317	25.117
1699	Desert Locust	65.417	28.583
1700	Desert Locust	70.05	28.117
1701	Desert Locust	70.3	28.417
1702	Desert Locust	70.9	26.917
1703	Desert Locust	70.9	26.917
1704	Desert Locust	-7.25	16.617
1705	Desert Locust	-13.033	18.333
1706	Desert Locust	-13.133	17.833
1707	Desert Locust	63.067	25.983
1708	Desert Locust	64.1	26.967
1709	Desert Locust	66.617	25.8
1710	Desert Locust	71.683	29.4
1711	Desert Locust	72.033	28.333
1712	Desert Locust	74.117	28.417
1713	Desert Locust	-7.667	16.667
1714	Desert Locust	0.4	17.417
1715	Desert Locust	-14.6	24.5
1716	Desert Locust	-4.95	31.817
1717	Desert Locust	63.467	25.267
1718	Desert Locust	69.083	25.55
1719	Desert Locust	66.183	25.617
1720	Desert Locust	70.3	28.417
1721	Desert Locust	71.683	29.4
1722	Desert Locust	70.9	26.917
1723	Desert Locust	-15.55	17.25
1724	Desert Locust	-14.467	19.433
1725	Desert Locust	11	31.867
1726	Desert Locust	-4.4	31.117
1727	Desert Locust	37.8	18.283
1728	Desert Locust	37.333	19.15
1729	Desert Locust	37.467	18.4
1730	Desert Locust	-14.317	19.8
1731	Desert Locust	-14.183	19.917
1732	Desert Locust	-13	20.5
1733	Desert Locust	-14.383	19.894
1734	Desert Locust	-12.583	18.367
1735	Desert Locust	-5.7	15.867
1736	Desert Locust	-7.25	17.167
1737	Desert Locust	-11.6	18.533
1738	Desert Locust	-11.367	16.983
1739	Desert Locust	-8.833	16.9
1740	Desert Locust	-11.183	17.367
1741	Desert Locust	-11.05	16.617
1742	Desert Locust	-12.933	18.25
1743	Desert Locust	-12.317	17.9
1744	Desert Locust	34.6669	23.55
1745	Desert Locust	73.3	28.017
1746	Desert Locust	70.5	26.833
1747	Desert Locust	62.217	25.55
1748	Desert Locust	65.067	27.817
1749	Desert Locust	67.25	25.883
1750	Desert Locust	69.83	27.468
1751	Desert Locust	43.117	16.017
1752	Desert Locust	43.3	14.683
1753	Desert Locust	38.3	18.183
1754	Desert Locust	71.383	25.75
1755	Desert Locust	66.617	25.8
1756	Desert Locust	66.617	25.8
1757	Desert Locust	69.417	27.167
1758	Desert Locust	66.417	26.467
1759	Desert Locust	70.3	28.417
1760	Desert Locust	-7.75	26.95
1761	Desert Locust	45	10.417
1762	Desert Locust	5.917	18.333
1763	Desert Locust	-14.233	19.867
1764	Desert Locust	-10.6	21.55
1765	Desert Locust	-9.583	17.083
1766	Desert Locust	-5.867	16.633
1767	Desert Locust	-7.783	16.833
1768	Desert Locust	-12.033	18.567
1769	Desert Locust	-11.383	16.7
1770	Desert Locust	-11.117	16.767
1771	Desert Locust	-12.833	18.333
1772	Desert Locust	-11.6	18.2
1773	Desert Locust	-15.917	17.133
1774	Desert Locust	-14.5	17.567
1775	Desert Locust	-14.417	19.767
1776	Desert Locust	22	27.75
1777	Desert Locust	39.45	15.533
1778	Desert Locust	39.183	15.9
1779	Desert Locust	74.017	28.45
1780	Desert Locust	74.117	28.417
1781	Desert Locust	61.783	25.533
1782	Desert Locust	71.333	28.333
1783	Desert Locust	70.783	28.317
1784	Desert Locust	42.9669	16.2333
1785	Desert Locust	33.433	16.7
1786	Desert Locust	37.85	18.367
1787	Desert Locust	37.683	18.35
1788	Desert Locust	-13.75	17.317
1789	Desert Locust	-10.967	16.567
1790	Desert Locust	-7.417	16.833
1791	Desert Locust	-11.333	18.5
1792	Desert Locust	20.867	16.008
1793	Desert Locust	73.767	28.183
1794	Desert Locust	72.8	28.517
1795	Desert Locust	67.25	25.883
1796	Desert Locust	62	25.5
1797	Desert Locust	71.5	28.5
1798	Desert Locust	69.867	27.517
1799	Desert Locust	43	15.733
1800	Desert Locust	35.717	20.067
1801	Desert Locust	37.8	18.333
1802	Desert Locust	5.933	17.4
1803	Desert Locust	5.917	18.5
1804	Desert Locust	-11.383	21.017
1805	Desert Locust	-13.967	21.133
1806	Desert Locust	-6.167	17.05
1807	Desert Locust	-6.383	17.167
1808	Desert Locust	-11.283	16.75
1809	Desert Locust	-12.35	17.833
1810	Desert Locust	-11.317	16.817
1811	Desert Locust	-13.083	17.55
1812	Desert Locust	-10.95	16.55
1813	Desert Locust	-12.967	18.367
1814	Desert Locust	-11.05	18.567
1815	Desert Locust	34.1331	23.1331
1816	Desert Locust	70.25	26.35
1817	Desert Locust	73.033	28.117
1818	Desert Locust	70.567	26.867
1819	Desert Locust	62.9	25.467
1820	Desert Locust	65.817	25.417
1821	Desert Locust	65.6	26.5
1822	Desert Locust	70.5	25.833
1823	Desert Locust	37.083	17.05
1824	Desert Locust	63.067	25.983
1825	Desert Locust	62.317	25.117
1826	Desert Locust	68.9	27.7
1827	Desert Locust	73.367	28.017
1828	Desert Locust	-12.833	18.167
1829	Desert Locust	-12.8	26.883
1830	Desert Locust	-4.467	32.217
1831	Desert Locust	37.8	18.333
1832	Desert Locust	37.683	18.35
1833	Desert Locust	38.3	18.183
1834	Desert Locust	37.883	18.3
1835	Desert Locust	5.833	18.417
1836	Desert Locust	5.7	18.767
1837	Desert Locust	-14.55	19.3
1838	Desert Locust	-11.6169	20.9331
1839	Desert Locust	-8.417	16.6
1840	Desert Locust	-6.3	17.083
1841	Desert Locust	-6.667	17.033
1842	Desert Locust	-12.433	17.383
1843	Desert Locust	-13.15	17.533
1844	Desert Locust	-7.983	16.7
1845	Desert Locust	-12.483	17.55
1846	Desert Locust	-13.267	18.983
1847	Desert Locust	-7.467	16.817
1848	Desert Locust	-13.75	18.65
1849	Desert Locust	16.733	20.033
1850	Desert Locust	34.6669	23.55
1851	Desert Locust	72.8	28.517
1852	Desert Locust	73.05	27.65
1853	Desert Locust	71.8	26.917
1854	Desert Locust	62.217	25.55
1855	Desert Locust	64.467	26.05
1856	Desert Locust	71.967	28.2
1857	Desert Locust	69.517	27.317
1858	Desert Locust	43.3	14.683
1859	Desert Locust	37.3	18.983
1860	Desert Locust	-4.467	31.917
1861	Desert Locust	-6.917	30.917
1862	Desert Locust	39.067	15.867
1863	Desert Locust	6.117	18.3
1864	Desert Locust	5.55	18.733
1865	Desert Locust	-11.5	21.05
1866	Desert Locust	-14.517	19.65
1867	Desert Locust	-12.717	18.533
1868	Desert Locust	-11.367	17.367
1869	Desert Locust	-6.467	17.233
1870	Desert Locust	-11.35	16.767
1871	Desert Locust	-11.7	18.333
1872	Desert Locust	73.367	28.017
1873	Desert Locust	37.4	18.7
1874	Desert Locust	38.417	17.867
1875	Desert Locust	-14.767	19.767
1876	Desert Locust	37.8	18.283
1877	Desert Locust	38.417	17.85
1878	Desert Locust	37.717	18.2
1879	Desert Locust	37.4	18.7
1880	Desert Locust	37.683	18.35
1881	Desert Locust	-12.85	18.383
1882	Desert Locust	37.717	18.35
1883	Desert Locust	-14.017	19.633
1884	Desert Locust	-12.967	18.367
1885	Desert Locust	38.35	17.733
1886	Desert Locust	37.7	18.367
1887	Desert Locust	-11.3	21.217
1888	Desert Locust	37.75	18.283
1889	Desert Locust	40.75	19.667
1890	Desert Locust	39.667	20.583
1891	Desert Locust	43.283	15.05
1892	Desert Locust	74.117	28.417
1893	Desert Locust	39.067	15.867
1894	Desert Locust	12.083	13.317
1895	Desert Locust	-11.15	16.9
1896	Desert Locust	-0.05	27.6
1897	Desert Locust	37.333	18.937
1898	Desert Locust	32.833	23.533
1899	Desert Locust	72.133	29.017
1900	Desert Locust	34.083	23.667
1901	Desert Locust	69.183	26.817
1902	Desert Locust	-0.217	28.217
1903	Desert Locust	-16.217	15.617
1904	Desert Locust	11.367	13.4
1905	Desert Locust	73.367	28.017
1906	Desert Locust	34.667	23.75
1907	Desert Locust	34.5	24.033
1908	Desert Locust	70.483	28.267
1909	Desert Locust	26.017	14.617
1910	Desert Locust	30.39	14.348
1911	Desert Locust	38.333	17.746
1912	Desert Locust	37.333	18.937
1913	Desert Locust	32.833	23.25
1914	Desert Locust	12.217	13.25
1915	Desert Locust	-14.95	16.667
1916	Desert Locust	37.333	18.982
1917	Desert Locust	34.75	23.583
1918	Desert Locust	-16.167	15.833
1919	Desert Locust	11.483	13.25
1920	Desert Locust	-16.5	16.033
1921	Desert Locust	22.0831	14.5169
1922	Desert Locust	-15.567	16.167
1923	Desert Locust	-17.417	14.683
1924	Desert Locust	11.35	13.383
1925	Desert Locust	-0.267	27.767
1926	Desert Locust	-16.117	16.117
1927	Desert Locust	-16.25	16.017
1928	Desert Locust	-0.3	27.883
1929	Desert Locust	-16.067	14.15
1930	Desert Locust	-15.833	16.267
1931	Desert Locust	31.833	22.5
1932	Desert Locust	37.357	19.105
1933	Desert Locust	38.333	17.764
1934	Desert Locust	71.383	25.75
1935	Desert Locust	38.333	17.845
1936	Desert Locust	42.5333	16.9
1937	Desert Locust	39.3167	22.15
1938	Desert Locust	39.2667	22.5333
1939	Desert Locust	39.2	25.7
1940	Desert Locust	40.45	25.9667
1941	Desert Locust	40.8667	25.9833
1942	Desert Locust	31.833	16.1
1943	Desert Locust	-11.609	17.059
1944	Desert Locust	-15.983	16.1
1945	Desert Locust	40.9167	19.8333
1946	Desert Locust	37.307	19.055
1947	Desert Locust	-0.267	27.767
1948	Desert Locust	45.733	14.783
1949	Desert Locust	45.717	14.983
1950	Desert Locust	66.6169	25.8
1951	Desert Locust	66.617	25.8
1952	Desert Locust	65.917	29.633
1953	Desert Locust	64.383	25.383
1954	Desert Locust	73.4	28
1955	Desert Locust	59.5	25.45
1956	Desert Locust	39.383	15.717
1957	Desert Locust	38.75	16.25
1958	Desert Locust	47.117	10.75
1959	Desert Locust	11.683	13.583
1960	Desert Locust	12.217	13.25
1961	Desert Locust	7.5	18.083
1962	Desert Locust	-14.983	16.667
1963	Desert Locust	-15.683	16.467
1964	Desert Locust	-14.525	16.609
1965	Desert Locust	-14.817	16.65
1966	Desert Locust	-1.433	32.067
1967	Desert Locust	16.533	19.117
1968	Desert Locust	18.517	16.9
1969	Desert Locust	20.6	15.65
1970	Desert Locust	17	21.417
1971	Desert Locust	20.917	15.75
1972	Desert Locust	17.367	15.017
1973	Desert Locust	2.267	16.5
1974	Desert Locust	0.017	20.283
1975	Desert Locust	0.883	20.317
1976	Desert Locust	-9.617	16.667
1977	Desert Locust	-11.667	17.7
1978	Desert Locust	-12.167	21.65
1979	Desert Locust	2.883	24.733
1980	Desert Locust	-14.2	22.567
1981	Desert Locust	-1.95	32.533
1982	Desert Locust	25.617	14.5
1983	Desert Locust	37.417	18.75
1984	Desert Locust	38.267	18.167
1985	Desert Locust	44.7	12.967
1986	Desert Locust	42.95	14.8
1987	Desert Locust	45.05	16.883
1988	Desert Locust	33.8167	15.9
1989	Desert Locust	33.3167	15.4167
1990	Desert Locust	32.3833	15.8333
1991	Desert Locust	33.1167	15.5333
1992	Desert Locust	33.4167	15.8
1993	Desert Locust	-11.5833	18.2
1994	Desert Locust	35.9225	21.1047
1995	Desert Locust	20.9167	15.8167
1996	Desert Locust	20.9167	15.8167
1997	Desert Locust	20.9	15.7411
1998	Desert Locust	1.46667	19.4833
1999	Desert Locust	2.36667	18.3833
[truncated: 16,619 more rows]

## Sheet: Occurrence data after cleaning
ID	SPECIES	lon	lat
1	Desert Locust	-15.5481	17.5094
2	Desert Locust	37.7275	18.4261
3	Desert Locust	37.3333	19.3167
4	Desert Locust	37.35	19.2333
5	Desert Locust	-11.4136	18.5239
6	Desert Locust	-12.4328	18.4033
7	Desert Locust	-15.2525	16.9861
8	Desert Locust	-14.8361	17.1178
9	Desert Locust	-13.4983	17.4872
10	Desert Locust	-14.6747	18.1189
11	Desert Locust	-14.6781	17.985
12	Desert Locust	-14.6228	17.9256
13	Desert Locust	-14.7428	17.9922
14	Desert Locust	-15.3508	17.4586
15	Desert Locust	72.2667	27.5333
16	Desert Locust	69.7	24.6667
17	Desert Locust	-9.61667	16.6667
18	Desert Locust	-11.1667	19
19	Desert Locust	-13.5	17.5
20	Desert Locust	-14.8	17.2
21	Desert Locust	47	15
22	Desert Locust	61.7833	25.05
23	Desert Locust	64.45	28.2
24	Desert Locust	66.5	27.3667
25	Desert Locust	64.9833	28.5167
26	Desert Locust	-12.6639	18.2853
27	Desert Locust	-10.3839	15.4661
28	Desert Locust	-9.43722	16.6064
29	Desert Locust	-9.39389	16.5725
30	Desert Locust	1.185	20.2672
31	Desert Locust	1.07056	20.5539
32	Desert Locust	1.06917	20.7589
33	Desert Locust	2.3	19.9667
34	Desert Locust	71.0667	27.3833
35	Desert Locust	70.8	27.6667
36	Desert Locust	70.7	27.7833
37	Desert Locust	70.4	27.8667
38	Desert Locust	70.3667	28.8
39	Desert Locust	71.4167	27.1
40	Desert Locust	71.8333	27.5167
41	Desert Locust	72.1667	29.0667
42	Desert Locust	66.7333	25.5167
43	Desert Locust	66.75	25.3
44	Desert Locust	66.7333	25.4667
45	Desert Locust	66.9167	25.3
46	Desert Locust	66.9667	25.2167
47	Desert Locust	66.6	25.55
48	Desert Locust	69.75	25.5
49	Desert Locust	69.8333	24.9667
50	Desert Locust	66.1667	25.6167
51	Desert Locust	66.4167	25.55
52	Desert Locust	66.75	25.25
53	Desert Locust	66.0667	25.6667
54	Desert Locust	66.8167	25.4167
55	Desert Locust	66.75	25.6667
56	Desert Locust	35.9167	18.2833
57	Desert Locust	38.75	16.4667
58	Desert Locust	-15.7992	16.1981
59	Desert Locust	-6.45306	15.2153
60	Desert Locust	-0.40423	20.3722
61	Desert Locust	1.25333	19.6836
62	Desert Locust	1.41778	19.8056
63	Desert Locust	3.83583	18.2217
64	Desert Locust	7.85972	18.7769
65	Desert Locust	8.41778	19.8817
66	Desert Locust	-8.30222	17.0206
67	Desert Locust	49.1833	11.2833
68	Desert Locust	49.1667	11.2833
69	Desert Locust	48.7728	10.2139
70	Desert Locust	39.8167	21.4333
71	Desert Locust	40.35	21.25
72	Desert Locust	71.6667	27.7667
73	Desert Locust	71.6833	27.7667
74	Desert Locust	-15.4339	16.6047
75	Desert Locust	-12.585	22.64
76	Desert Locust	-12.3964	20.4014
77	Desert Locust	-13.7558	18.8089
78	Desert Locust	-14.2483	18.7861
79	Desert Locust	-13.6786	17.9786
80	Desert Locust	-11.0833	17.6667
81	Desert Locust	72.7	28.1
82	Desert Locust	71.8833	27.85
83	Desert Locust	71.8333	27.0833
84	Desert Locust	69.6	27.7667
85	Desert Locust	69.75	27.4833
86	Desert Locust	-16.1008	16.8883
87	Desert Locust	-16.2936	16.6378
88	Desert Locust	-16.0322	16.6161
89	Desert Locust	-15.8344	16.4683
90	Desert Locust	-15.3144	16.5633
91	Desert Locust	-14.2775	16.6478
92	Desert Locust	-15.7489	16.6556
93	Desert Locust	-15.5944	16.6836
94	Desert Locust	43.45	10.9833
95	Desert Locust	43.4667	11.2
96	Desert Locust	-14.8028	17.7792
97	Desert Locust	-14.7881	17.7731
98	Desert Locust	-15.6347	18.1272
99	Desert Locust	-14.0369	18.2019
100	Desert Locust	27.6667	27.75
101	Desert Locust	44.7167	13.8
102	Desert Locust	25.55	14.1333
103	Desert Locust	71.4167	25.7167
104	Desert Locust	72.4833	27.1833
105	Desert Locust	71.5333	26.95
106	Desert Locust	71.5833	26.85
107	Desert Locust	71.2667	27.2833
108	Desert Locust	71.5	25.0667
109	Desert Locust	66.7833	25.6333
110	Desert Locust	66.6333	25.6167
111	Desert Locust	66.9167	25.9833
112	Desert Locust	69.9667	25.1667
113	Desert Locust	70.5833	25.0333
114	Desert Locust	70.6667	24.35
115	Desert Locust	70.0333	27.7667
116	Desert Locust	66.4	25.55
117	Desert Locust	66.7	25.5333
118	Desert Locust	69.7333	25.45
119	Desert Locust	30.3167	17.9
120	Desert Locust	0.966667	19.8667
121	Desert Locust	-10.6167	13.4333
122	Desert Locust	43.6	10.75
123	Desert Locust	6.47528	18.0561
124	Desert Locust	6.59611	18.0506
125	Desert Locust	7.50944	18.7172
126	Desert Locust	7.80333	18.5219
127	Desert Locust	37.7333	18.4167
128	Desert Locust	36.8	18.6167
129	Desert Locust	1.475	20.9467
130	Desert Locust	3.81611	16.9003
131	Desert Locust	6.04028	17.3881
132	Desert Locust	7.90194	18.6186
133	Desert Locust	-15.7847	18.1036
134	Desert Locust	71.75	27.3667
135	Desert Locust	70.6667	25.6333
136	Desert Locust	69.7333	27.4833
137	Desert Locust	69.9333	27.9667
138	Desert Locust	70	27.6333
139	Desert Locust	68.85	26.8333
140	Desert Locust	71.4167	28.3333
141	Desert Locust	71.6833	28.1
142	Desert Locust	71.9667	28.2
143	Desert Locust	71.1	27.2167
144	Desert Locust	72.8167	27.0667
145	Desert Locust	-14.2847	18.9036
146	Desert Locust	-13.9575	18.7875
147	Desert Locust	-11.8817	18.4533
148	Desert Locust	-11.8833	18.46
149	Desert Locust	-11.0839	17.6383
150	Desert Locust	-10.5242	15.4422
151	Desert Locust	-9.57972	16.6158
152	Desert Locust	-9.57194	16.6067
153	Desert Locust	24.4333	18.5833
154	Desert Locust	24.4833	14.2167
155	Desert Locust	44.1322	17.4917
156	Desert Locust	37.9167	18.4167
157	Desert Locust	37.4	19
158	Desert Locust	37.3	19.1167
159	Desert Locust	37.3	19.4
160	Desert Locust	-7.35222	17.8789
161	Desert Locust	-0.58883	19.2161
162	Desert Locust	-0.39251	19.0272
163	Desert Locust	1.43111	19.0364
164	Desert Locust	1.48444	18.5997
165	Desert Locust	1.77222	18.6697
166	Desert Locust	2.25611	18.6106
167	Desert Locust	0.97129	19.5256
168	Desert Locust	72.7833	28.1
169	Desert Locust	72.8	28.5167
170	Desert Locust	71.9167	25.4
171	Desert Locust	72.3	27.5333
172	Desert Locust	72.6833	28.4
173	Desert Locust	70.9167	27.6167
174	Desert Locust	69.75	26.1667
175	Desert Locust	69.8333	26.0833
176	Desert Locust	70.0833	26.4167
177	Desert Locust	70.05	26.3333
178	Desert Locust	70.0333	26.1
179	Desert Locust	70.25	25.1667
180	Desert Locust	69.75	25.9167
181	Desert Locust	69.8333	26.1667
182	Desert Locust	69.75	25.8833
183	Desert Locust	47.15	10.7
184	Desert Locust	-0.833333	18.8333
185	Desert Locust	1.16667	19.9167
186	Desert Locust	-14.2667	16.5833
187	Desert Locust	-15.95	18.1
188	Desert Locust	-11.0636	17.6656
189	Desert Locust	-10.3283	16.8556
190	Desert Locust	-13.2589	17.7786
191	Desert Locust	-14.7808	17.7894
192	Desert Locust	-15.5858	17.5394
193	Desert Locust	-15.2342	16.9922
194	Desert Locust	-11.9508	17.9522
195	Desert Locust	-14.3036	18.1775
196	Desert Locust	-14.2969	17.7233
197	Desert Locust	-14.6475	17.9347
198	Desert Locust	71.8667	27.85
199	Desert Locust	72.0167	27.7833
200	Desert Locust	72.0333	28.7833
201	Desert Locust	72.0333	27.7167
202	Desert Locust	72.4333	27.65
203	Desert Locust	71.9833	27.9333
204	Desert Locust	40.75	20.15
205	Desert Locust	-14.0333	12.9167
206	Desert Locust	-14.1333	18.9167
207	Desert Locust	70.5167	27.75
208	Desert Locust	70.9667	27.7667
209	Desert Locust	70.2667	25.15
210	Desert Locust	70.7	25.6667
211	Desert Locust	70.7	25.65
212	Desert Locust	69.8833	24.8167
213	Desert Locust	70.7667	24.55
214	Desert Locust	70.3667	24.6667
215	Desert Locust	-11.2417	20.3208
216	Desert Locust	-12.7094	22.0461
217	Desert Locust	-0.41298	20.3614
218	Desert Locust	1.24472	19.69
219	Desert Locust	2.28417	19.7342
220	Desert Locust	-14.05	18.6667
221	Desert Locust	1.16667	19.0333
222	Desert Locust	1.76667	19.05
223	Desert Locust	1.91667	19.55
224	Desert Locust	2.08333	19.05
225	Desert Locust	2.11667	19.3
226	Desert Locust	1.75	19.7
227	Desert Locust	7.75	18.75
228	Desert Locust	5.88333	17.4167
229	Desert Locust	2	18.5
230	Desert Locust	-15.6833	17.4167
231	Desert Locust	2.11667	20
232	Desert Locust	2.36667	19.8333
233	Desert Locust	-1.4	18.4333
234	Desert Locust	43.85	10.7667
235	Desert Locust	44.2667	10.2833
236	Desert Locust	44.3333	10.25
237	Desert Locust	6.42528	26.5794
238	Desert Locust	-13.8731	18.9356
239	Desert Locust	-13.8483	18.8708
240	Desert Locust	-13.4464	18.2708
241	Desert Locust	-13.7928	17.0886
242	Desert Locust	-9.32778	16.7831
243	Desert Locust	-15.7903	18.0653
244	Desert Locust	-15.6822	18.0339
245	Desert Locust	-16.3089	16.4806
246	Desert Locust	-14.0708	16.6617
247	Desert Locust	-15.2167	16.9333
248	Desert Locust	0.9	18.6667
249	Desert Locust	1.43333	18.75
250	Desert Locust	-14.3167	16.65
251	Desert Locust	-14.4167	16.65
252	Desert Locust	2.91667	17.5833
253	Desert Locust	-14.7	16.6833
254	Desert Locust	-14.95	16.6667
255	Desert Locust	-14.9	16.75
256	Desert Locust	-14.85	18
257	Desert Locust	-15.3333	16.8333
258	Desert Locust	-15.8167	16.5
259	Desert Locust	-15.1833	17.8167
260	Desert Locust	-15.0333	14.5
261	Desert Locust	-15.1	18.5333
262	Desert Locust	-12	18
263	Desert Locust	6.53333	18.0333
264	Desert Locust	5.38333	18.0333
265	Desert Locust	7.41667	18.7167
266	Desert Locust	5.75	18.75
267	Desert Locust	-14.95	18.1833
268	Desert Locust	-15.1333	18.3167
269	Desert Locust	-14.9	18.4167
270	Desert Locust	41.4833	20.0333
271	Desert Locust	43.5667	15.4833
272	Desert Locust	72.2833	27.4333
273	Desert Locust	71.1333	25.5167
274	Desert Locust	72.7081	28.1
275	Desert Locust	71.5167	27
276	Desert Locust	72.8333	29.0167
277	Desert Locust	71.9333	28.2167
278	Desert Locust	70.2833	28.3333
279	Desert Locust	69.6	24.4667
280	Desert Locust	69.75	24.8333
281	Desert Locust	70.25	25.1
282	Desert Locust	-16.25	15.7167
283	Desert Locust	-13.8333	18.9667
284	Desert Locust	37.8333	18.4167
285	Desert Locust	42.0833	11.3333
286	Desert Locust	-10.35	15.5
287	Desert Locust	-10.75	15.5333
288	Desert Locust	69.7833	26.1167
289	Desert Locust	40.1667	20.1667
290	Desert Locust	39.7	20.8333
291	Desert Locust	35.9333	27.9167
292	Desert Locust	39.35	21.9247
293	Desert Locust	39.3167	22.15
294	Desert Locust	44.6333	10.3833
295	Desert Locust	-15.3128	16.6864
296	Desert Locust	-14.8964	16.7669
297	Desert Locust	-14.9133	16.8694
298	Desert Locust	-15.1264	17.0019
299	Desert Locust	-15.4042	16.9481
300	Desert Locust	-15.1914	16.9706
301	Desert Locust	-15.1097	16.9708
302	Desert Locust	-15.0622	16.8342
303	Desert Locust	-14.5589	17.4658
304	Desert Locust	-14.5367	17.6475
305	Desert Locust	-14.2892	17.6825
306	Desert Locust	-14.2881	17.6828
307	Desert Locust	-14.6761	18.0069
308	Desert Locust	-13.7814	17.9861
309	Desert Locust	-12.9031	18.3967
310	Desert Locust	-12.8578	18.6367
311	Desert Locust	71.9167	28.2167
312	Desert Locust	71.9167	28.4333
313	Desert Locust	70.0333	26.3167
314	Desert Locust	2.48333	20.8167
315	Desert Locust	2.08333	20.4833
316	Desert Locust	1.96667	20.7833
317	Desert Locust	2.3	20.6167
318	Desert Locust	2.56667	20.3333
319	Desert Locust	-15.25	16.8333
320	Desert Locust	-15.5	16.6667
321	Desert Locust	-15.4167	16.9167
322	Desert Locust	-14.85	16.75
323	Desert Locust	-14.9167	16.8333
324	Desert Locust	3.79167	18.1603
325	Desert Locust	2.09139	17.7081
326	Desert Locust	5.71917	18.7794
327	Desert Locust	6.49028	18.05
328	Desert Locust	6.59333	18.0517
329	Desert Locust	24.4	14.5833
330	Desert Locust	1.08278	19.7769
331	Desert Locust	1.35667	19.9111
332	Desert Locust	5.90528	18.6836
333	Desert Locust	70.0667	27.5833
334	Desert Locust	69.9167	27
335	Desert Locust	69.8833	27.4167
336	Desert Locust	69.35	27.0333
337	Desert Locust	71.3333	28.4167
338	Desert Locust	71.9167	28.1667
339	Desert Locust	62	25.5
340	Desert Locust	61.8667	25.4333
341	Desert Locust	-3	13
342	Desert Locust	-15.4333	17.3167
343	Desert Locust	-15.5	17.2333
344	Desert Locust	-15.2333	16.9167
345	Desert Locust	39.1731	21.5436
346	Desert Locust	43.9333	10.5333
347	Desert Locust	44.4333	10.4
348	Desert Locust	43.0167	15.3333
349	Desert Locust	43	15.7333
350	Desert Locust	72.25	27.5667
351	Desert Locust	74.25	28.45
352	Desert Locust	-15.0967	16.9086
353	Desert Locust	-14.8161	17.0133
354	Desert Locust	-15.8219	16.5383
355	Desert Locust	-15.5939	16.5817
356	Desert Locust	-15.5744	16.4417
357	Desert Locust	-15.5806	16.4417
358	Desert Locust	48.3	15.8333
359	Desert Locust	2.27444	19.0453
360	Desert Locust	2.35306	19.2739
361	Desert Locust	2.02694	19.5428
362	Desert Locust	1.14833	19.7919
363	Desert Locust	2.02306	19.0644
364	Desert Locust	25.55	14.5833
365	Desert Locust	7.91667	19.6333
366	Desert Locust	7.56667	19.7167
367	Desert Locust	7.75	18.8333
368	Desert Locust	70.7	27.6667
369	Desert Locust	72.9167	27.6667
370	Desert Locust	70.85	24.9667
371	Desert Locust	6.5	19
372	Desert Locust	-7.4	19.5167
373	Desert Locust	8.33333	19.9167
374	Desert Locust	8.1	19.6667
375	Desert Locust	7.76667	18.9833
376	Desert Locust	7.31667	18.5167
377	Desert Locust	-13.4467	18.2056
378	Desert Locust	-11.9639	17.9139
379	Desert Locust	-8.85472	16.7267
380	Desert Locust	6.43056	18.7597
381	Desert Locust	5.27278	18.255
382	Desert Locust	4.52611	17.7581
383	Desert Locust	44.4167	12.9667
384	Desert Locust	44.5	13
385	Desert Locust	44.3131	12.9806
386	Desert Locust	44.3333	10.2219
387	Desert Locust	44.3333	10.2308
388	Desert Locust	44.3333	10.24
389	Desert Locust	2.47139	19.5078
390	Desert Locust	2.86806	20.3039
391	Desert Locust	2.84028	20.4606
392	Desert Locust	2.575	20.5036
393	Desert Locust	2.33111	20.4094
394	Desert Locust	2.18306	20.6594
395	Desert Locust	2.72806	20.7469
396	Desert Locust	4.17611	17.4658
397	Desert Locust	5.325	18.3808
398	Desert Locust	-15.4667	16.5833
399	Desert Locust	-15.5167	16.6333
400	Desert Locust	-15.1333	16.5333
401	Desert Locust	72.4167	29.75
402	Desert Locust	2.5	20.5
403	Desert Locust	-15.1667	16.9167
404	Desert Locust	-15.4167	17.0833
405	Desert Locust	-15.0833	16.9167
406	Desert Locust	70.0667	24.9667
407	Desert Locust	70.4667	24.8
408	Desert Locust	69.5	25.7667
409	Desert Locust	69.7667	25.9667
410	Desert Locust	72.8167	28.0667
411	Desert Locust	71.9167	27.1333
412	Desert Locust	39.05	22.45
413	Desert Locust	38.7667	25.9333
414	Desert Locust	39.035	22.8036
415	Desert Locust	38.5833	23.6667
416	Desert Locust	38.0667	24.1167
417	Desert Locust	-14.8	17.9333
418	Desert Locust	-14.85	17.9167
419	Desert Locust	5.5	18.1167
420	Desert Locust	-11.9711	17.9719
421	Desert Locust	-15.2122	16.6478
422	Desert Locust	-15.1106	16.8933
423	Desert Locust	3.01472	17.5025
424	Desert Locust	4.27111	18.3528
425	Desert Locust	4.13917	18.6311
426	Desert Locust	5.17056	18.2967
427	Desert Locust	5.76972	18.0889
428	Desert Locust	7.97528	18.6053
429	Desert Locust	1.08611	18.6783
430	Desert Locust	1.13083	18.6269
431	Desert Locust	49.0333	10.6333
432	Desert Locust	-15.0167	16.8675
433	Desert Locust	-12.8553	16.5861
434	Desert Locust	5.9675	18.7136
435	Desert Locust	-15.1619	19.3242
436	Desert Locust	-13.795	19.6044
437	Desert Locust	-13.4614	19.7181
438	Desert Locust	-14.4139	18.9117
439	Desert Locust	-13.735	18.8092
440	Desert Locust	-13.8564	18.6233
441	Desert Locust	-15.1461	16.9211
442	Desert Locust	-15.2433	16.9075
443	Desert Locust	-9.53556	16.6308
444	Desert Locust	-10.3872	15.5025
445	Desert Locust	-10.4647	14.3733
446	Desert Locust	-10.4511	13.4567
447	Desert Locust	-0.4164	18.5583
448	Desert Locust	64.75	26.9167
449	Desert Locust	65.0333	27.0667
450	Desert Locust	65.5833	27.8333
451	Desert Locust	65.4	26.95
452	Desert Locust	67.3333	25.2333
453	Desert Locust	67.3667	25.2
454	Desert Locust	66.6333	25.25
455	Desert Locust	65.8833	26.25
456	Desert Locust	-9.57083	16.6397
457	Desert Locust	37.6833	18.4
458	Desert Locust	37.6833	18.3667
459	Desert Locust	37.7	18.3333
460	Desert Locust	37.75	18.3333
461	Desert Locust	36.25	18.75
462	Desert Locust	35.5	14.5
463	Desert Locust	44.3333	10.2042
464	Desert Locust	44.3333	10.2136
465	Desert Locust	2.06	19.7444
466	Desert Locust	2.405	19.8114
467	Desert Locust	2.35972	19.96
468	Desert Locust	2.66333	19.8
469	Desert Locust	2.52972	19.7228
470	Desert Locust	2.58333	19.5936
471	Desert Locust	69.8333	27.6
472	Desert Locust	71.6	28.6667
473	Desert Locust	72.0167	28.1333
474	Desert Locust	71.9667	28.4333
475	Desert Locust	71.1	28.0167
476	Desert Locust	72.15	29.0167
477	Desert Locust	44.4167	10.3833
478	Desert Locust	44.3167	10.15
479	Desert Locust	24.65	14.2167
480	Desert Locust	-15.5	18.1667
481	Desert Locust	-13.7667	18.6167
482	Desert Locust	44.7167	10.4
483	Desert Locust	-14.57	17.9481
484	Desert Locust	46	10.2
485	Desert Locust	-15.9164	16.7117
486	Desert Locust	-16.0867	16.5622
487	Desert Locust	-15.9186	15.9886
488	Desert Locust	-15.4933	16.5008
489	Desert Locust	-15.3219	16.47
490	Desert Locust	-15.275	16.5728
491	Desert Locust	-15.1553	16.4528
492	Desert Locust	-15.1192	16.7033
493	Desert Locust	70.5	28.1
494	Desert Locust	71.6833	27.8667
495	Desert Locust	-15.4667	17.25
496	Desert Locust	-15.7	17.6667
497	Desert Locust	65.5833	29.6
498	Desert Locust	66.7333	25.1167
499	Desert Locust	66.6333	25.5333
500	Desert Locust	43.3	11.4167
501	Desert Locust	43.8833	10.7
502	Desert Locust	-14.2936	18.6236
503	Desert Locust	-14.9611	18.3236
504	Desert Locust	-15.1458	18.4081
505	Desert Locust	-15.4431	18.0081
506	Desert Locust	66	28.3
507	Desert Locust	-12.7533	17.6419
508	Desert Locust	-12.5039	17.8206
509	Desert Locust	-10.8419	17.6761
510	Desert Locust	-9.33667	16.8478
511	Desert Locust	-7.85722	17.0811
512	Desert Locust	-0.37518	19.4467
513	Desert Locust	70.2167	28.0167
514	Desert Locust	70.6333	28.2333
515	Desert Locust	69.6	25.55
516	Desert Locust	69.6167	25.9
517	Desert Locust	-10.5833	15.4667
518	Desert Locust	-15.25	16.9167
519	Desert Locust	-15.4167	17.25
520	Desert Locust	-15.4	16.0833
521	Desert Locust	-16.05	16.5833
522	Desert Locust	-15.0333	16.7
523	Desert Locust	-15.5	16.75
524	Desert Locust	71.9167	28.4167
525	Desert Locust	63.0833	25.4667
526	Desert Locust	6.31667	26.65
527	Desert Locust	39.1333	21.9333
528	Desert Locust	41.5	19.25
529	Desert Locust	42.0167	17.7333
530	Desert Locust	71.3833	27.7667
531	Desert Locust	71.9333	26.4
532	Desert Locust	70.6667	26.7667
533	Desert Locust	71.9333	26.4667
534	Desert Locust	-14.8017	16.7433
535	Desert Locust	-14.5536	16.745
536	Desert Locust	-14.2242	16.6469
537	Desert Locust	-14.0728	16.6258
538	Desert Locust	-14.0922	16.6258
539	Desert Locust	-13.7656	16.3528
540	Desert Locust	-14.7122	17.6014
541	Desert Locust	1.24333	18.7181
542	Desert Locust	5.36833	17.2303
543	Desert Locust	5.36833	17.2181
544	Desert Locust	7.13694	18.1092
545	Desert Locust	-16.1772	15.8139
546	Desert Locust	37.8667	18.5
547	Desert Locust	37.85	18.4667
548	Desert Locust	8.02917	18.1947
549	Desert Locust	7.49556	18.515
550	Desert Locust	7.85361	18.9025
551	Desert Locust	8.38361	20.4536
552	Desert Locust	-14.5461	17.9444
553	Desert Locust	-15.055	16.8661
554	Desert Locust	66.4	26.7167
555	Desert Locust	66.0833	25.5167
556	Desert Locust	-15.8022	17.9972
557	Desert Locust	-15.8886	17.3511
558	Desert Locust	0.41275	19.5664
559	Desert Locust	1.13389	19.7322
560	Desert Locust	1.02083	18.895
561	Desert Locust	0.91933	18.4289
562	Desert Locust	2.12917	19.0172
563	Desert Locust	1.20444	20.2311
564	Desert Locust	1.07528	20.4864
565	Desert Locust	1.08278	20.6936
566	Desert Locust	1.4875	20.8786
567	Desert Locust	71.8833	26.6833
568	Desert Locust	-14.9442	16.9569
569	Desert Locust	-15.0022	16.9383
570	Desert Locust	-15.1775	16.6472
571	Desert Locust	-14.8478	16.6619
572	Desert Locust	-14.8036	16.7986
573	Desert Locust	-14.705	16.7425
574	Desert Locust	-14.81	16.7825
575	Desert Locust	-14.6175	16.6208
576	Desert Locust	-14.9553	16.6892
577	Desert Locust	-14.8072	16.9867
578	Desert Locust	63.5333	26.85
579	Desert Locust	66.3167	27.3333
580	Desert Locust	64.75	26.8667
581	Desert Locust	-8.15	17.0667
582	Desert Locust	-13.9833	17.1167
583	Desert Locust	-12.7833	17.8333
584	Desert Locust	-12.75	17.75
585	Desert Locust	6.38333	18.9167
586	Desert Locust	-13	17.7167
587	Desert Locust	-8.86667	16.7667
588	Desert Locust	-8.28333	17.0333
589	Desert Locust	-12.48	22.7
590	Desert Locust	-13.8667	17.9833
591	Desert Locust	-15.8	16.25
592	Desert Locust	4.66667	18.8333
593	Desert Locust	2.3	19.75
594	Desert Locust	-0.8	19.2833
595	Desert Locust	-0.65	19.1833
596	Desert Locust	-13.9	18.05
597	Desert Locust	69.7833	25.8333
598	Desert Locust	38.75	16.2
599	Desert Locust	46.15	13.8833
600	Desert Locust	38.3833	17.9667
601	Desert Locust	-0.49835	19.7078
602	Desert Locust	-0.07109	19.7239
603	Desert Locust	0.91159	18.7336
604	Desert Locust	0.99348	18.8981
605	Desert Locust	1.07972	18.6514
606	Desert Locust	1.15028	18.6514
607	Desert Locust	1.22806	18.7189
608	Desert Locust	70.4167	25.2833
609	Desert Locust	69.8333	27.5833
610	Desert Locust	69.8	27.5
611	Desert Locust	71.3333	28.75
612	Desert Locust	71.95	27.5833
613	Desert Locust	70.2167	25.85
614	Desert Locust	-15.6	17.5333
615	Desert Locust	-15.6667	17.4167
616	Desert Locust	70.0167	26.0833
617	Desert Locust	69.8	26.0167
618	Desert Locust	69.5	27.3667
619	Desert Locust	-15.3667	16.5833
620	Desert Locust	64.5833	27.9167
621	Desert Locust	64.6333	26.8333
622	Desert Locust	65.5167	27.5167
623	Desert Locust	65.7833	29.3
624	Desert Locust	66.5833	25.8
625	Desert Locust	69.9333	24.3
626	Desert Locust	70.5167	25.45
627	Desert Locust	56.45	23.65
628	Desert Locust	71.5333	27.75
629	Desert Locust	71.2667	26.4833
630	Desert Locust	39.9	20.65
631	Desert Locust	47.1167	11
632	Desert Locust	43.2333	11.1333
633	Desert Locust	48.5833	11.2833
634	Desert Locust	-0.413056	20.3614
635	Desert Locust	1.93333	17.4
636	Desert Locust	2.13333	17.6
637	Desert Locust	2.03333	17.6833
638	Desert Locust	2.18333	17.4167
639	Desert Locust	2.3	17.6
640	Desert Locust	7.35	18.35
641	Desert Locust	2.33333	17.3667
642	Desert Locust	70.9167	27.75
643	Desert Locust	70.8333	27.8333
644	Desert Locust	70.0833	27.7667
645	Desert Locust	0.9	20.3167
646	Desert Locust	-0.05	16.2667
647	Desert Locust	1.86667	17.5333
648	Desert Locust	2.01667	18.5
649	Desert Locust	66.5833	25.5833
650	Desert Locust	66.5833	25.4167
651	Desert Locust	70.9167	25.0833
652	Desert Locust	70.8833	24.8667
653	Desert Locust	70.9833	24.8333
654	Desert Locust	70.75	24.5167
655	Desert Locust	69.2	24.3333
656	Desert Locust	69.2167	26.9333
657	Desert Locust	68.8833	26.8667
658	Desert Locust	68.8	26.8667
659	Desert Locust	68.7833	26.8333
660	Desert Locust	68.7167	26.7667
661	Desert Locust	2.1	17.3833
662	Desert Locust	2.98333	17.3667
663	Desert Locust	2.13333	17.5
664	Desert Locust	-8.25	29.3833
665	Desert Locust	-8.26667	29.3333
666	Desert Locust	-5.8	30.3833
667	Desert Locust	8.28333	19.1333
668	Desert Locust	8.35	19.15
669	Desert Locust	2.13333	17.4333
670	Desert Locust	2.33333	17.5
671	Desert Locust	2.13333	17.5667
672	Desert Locust	2	17.4667
673	Desert Locust	-9.71667	29.7167
674	Desert Locust	2.16667	17.5667
675	Desert Locust	9.95	24.0667
676	Desert Locust	9.75	24.0667
677	Desert Locust	3	17.8333
678	Desert Locust	36.5	15.2333
679	Desert Locust	36.5333	15.2333
680	Desert Locust	36.5333	15.35
681	Desert Locust	36.3	15.3667
682	Desert Locust	32.1167	13.8167
683	Desert Locust	32.0167	15.95
684	Desert Locust	31.6667	14.2333
685	Desert Locust	25.4833	13.3333
686	Desert Locust	36.7167	18.7833
687	Desert Locust	36.7	18.7333
688	Desert Locust	36.9833	18.5333
689	Desert Locust	36.7833	18.65
690	Desert Locust	25.5	11.5
691	Desert Locust	37.4833	18.7333
692	Desert Locust	37.2833	19.1333
693	Desert Locust	38.5211	17.3175
694	Desert Locust	36.5833	14.25
695	Desert Locust	-4.83722	15.0283
696	Desert Locust	0.00824	19.2964
697	Desert Locust	1.3975	19.9058
698	Desert Locust	1.44972	18.7586
699	Desert Locust	2.195	19.3561
700	Desert Locust	2.48417	19.1789
701	Desert Locust	6.11472	19.2908
702	Desert Locust	6.26417	19.1367
703	Desert Locust	6.18194	18.9919
704	Desert Locust	6.31444	19.0283
705	Desert Locust	6.3975	18.9703
706	Desert Locust	6.24	17.7031
707	Desert Locust	6.69222	17.6158
708	Desert Locust	7.86056	19.2514
709	Desert Locust	7.91333	19.2728
710	Desert Locust	1.99167	17.7314
711	Desert Locust	2.04528	17.6825
712	Desert Locust	1.81694	17.4972
713	Desert Locust	1.87444	17.5339
714	Desert Locust	1.91417	17.4689
715	Desert Locust	1.90111	17.4794
716	Desert Locust	1.93917	17.3944
717	Desert Locust	8.5	18
718	Desert Locust	73.05	27.95
719	Desert Locust	72.3833	28.3
720	Desert Locust	72.95	28.2167
721	Desert Locust	35.7033	31.18
722	Desert Locust	66.6333	25.55
723	Desert Locust	67.1667	26.2667
724	Desert Locust	67.3333	25.6167
725	Desert Locust	39.6	24.4667
726	Desert Locust	39.25	22.8833
727	Desert Locust	48.9058	11.1167
728	Desert Locust	49.0056	11.1167
729	Desert Locust	49.0142	11.1167
730	Desert Locust	49.0233	11.1167
731	Desert Locust	49.0189	11.1167
732	Desert Locust	49.0422	11.1167
733	Desert Locust	4.2875	17.5789
734	Desert Locust	4.12417	17.5797
735	Desert Locust	5.16	17.9856
736	Desert Locust	5.16	17.9858
737	Desert Locust	5.89083	19.0594
738	Desert Locust	5.90306	19.0633
739	Desert Locust	5.82139	19.1172
740	Desert Locust	5.83917	19.1186
741	Desert Locust	5.83944	19.1194
742	Desert Locust	5.86667	19.1964
743	Desert Locust	36.5733	28.3903
744	Desert Locust	62.85	25.5333
745	Desert Locust	65.3	29.9167
746	Desert Locust	62.7333	28.3667
747	Desert Locust	64.1667	27.3667
748	Desert Locust	46.5167	23.6167
749	Desert Locust	42.5497	16.8919
750	Desert Locust	-15.1667	16.8333
751	Desert Locust	6.79722	18.7042
752	Desert Locust	6.80472	18.5844
753	Desert Locust	5.82139	18.0878
754	Desert Locust	5.80861	17.7894
755	Desert Locust	44.1833	10.2667
756	Desert Locust	44.6667	10.2167
757	Desert Locust	45.5833	10.3167
758	Desert Locust	45.6	10.7167
759	Desert Locust	-7.64306	28.8394
760	Desert Locust	-7.64444	28.8406
761	Desert Locust	-7.64417	28.8394
762	Desert Locust	8.86889	24.4769
763	Desert Locust	9.97556	23.7931
764	Desert Locust	10.0689	23.8094
765	Desert Locust	8.38528	19.5119
766	Desert Locust	8.31472	19.1633
767	Desert Locust	45.5667	10.55
768	Desert Locust	8.19028	19.6692
769	Desert Locust	-12.6164	17.8411
770	Desert Locust	-12.0111	17.2339
771	Desert Locust	-12.7122	15.9269
772	Desert Locust	-14.9833	18.2167
773	Desert Locust	-14.7	18.0333
774	Desert Locust	-9.55	16.4
775	Desert Locust	-8.63333	16.5667
776	Desert Locust	-15.5833	16.9833
777	Desert Locust	8.16667	18.8667
778	Desert Locust	8.35	18.5167
779	Desert Locust	-9.55	16.2
780	Desert Locust	-15.5167	16.8
781	Desert Locust	-15.3167	16.8833
782	Desert Locust	-12.55	17.8333
783	Desert Locust	-8.35	16.2667
784	Desert Locust	-8.36667	16.3833
785	Desert Locust	6.53333	16.8667
786	Desert Locust	6.53333	17.2667
787	Desert Locust	-11.05	16.65
788	Desert Locust	-15.0667	12.0583
789	Desert Locust	-11.9167	18.0667
790	Desert Locust	-15.1167	17.175
791	Desert Locust	-11.6333	18.2667
792	Desert Locust	-15.1	17.0667
793	Desert Locust	-11.2667	16.7833
794	Desert Locust	-10.15	16.2667
795	Desert Locust	6.2	18.1833
796	Desert Locust	-13.7333	19.8
797	Desert Locust	-10.125	17.1583
798	Desert Locust	-10.1	17.45
799	Desert Locust	-10.1333	17.4667
800	Desert Locust	-10.225	17.3917
801	Desert Locust	-11.3167	17.35
802	Desert Locust	-10.2667	17.375
803	Desert Locust	-10.25	17.4
804	Desert Locust	-11.4167	18.3667
805	Desert Locust	-10.4667	17.3833
806	Desert Locust	-10.4667	17.3
807	Desert Locust	-9.91667	16.85
808	Desert Locust	-14.9333	18.2333
809	Desert Locust	-14.8667	18.2833
810	Desert Locust	-11.0667	17.55
811	Desert Locust	-7.66667	17.1667
812	Desert Locust	-14.7333	18.2842
813	Desert Locust	-9.01667	16.6333
814	Desert Locust	-14.7	18.475
815	Desert Locust	7.83333	19.4667
816	Desert Locust	5.63333	18.2333
817	Desert Locust	-11.0333	16.8333
818	Desert Locust	-8.63333	16.6
819	Desert Locust	-14.6667	18.5
820	Desert Locust	-14.6167	18.5167
821	Desert Locust	8.98333	17.7833
822	Desert Locust	54.1667	17.3333
823	Desert Locust	57.75	23.6667
824	Desert Locust	-6.76667	17.25
825	Desert Locust	-8.81667	16.9833
826	Desert Locust	58.1167	22.5
827	Desert Locust	59.2564	22.4006
828	Desert Locust	59.25	21.5667
829	Desert Locust	55.9833	24.0167
830	Desert Locust	58.1667	22.8333
831	Desert Locust	55.7392	23.3831
832	Desert Locust	57.6203	23.7469
833	Desert Locust	56.6964	24.3867
834	Desert Locust	56.7	24.3167
835	Desert Locust	56.1	22.9
836	Desert Locust	56.6833	22.7333
837	Desert Locust	59.7031	22.2256
838	Desert Locust	56.4667	21.9667
839	Desert Locust	-6.58333	17.0167
840	Desert Locust	-12.9667	21.3333
841	Desert Locust	41.05	-1.71667
842	Desert Locust	41.05	-1.03333
843	Desert Locust	57.2817	23.1178
844	Desert Locust	57.5	22.3833
845	Desert Locust	57.9619	23.6886
846	Desert Locust	57.2525	23.7656
847	Desert Locust	56.75	24.3667
848	Desert Locust	57.9833	23.6833
849	Desert Locust	58.9167	21.9333
850	Desert Locust	57.9167	21.7833
851	Desert Locust	57.9208	23.3039
852	Desert Locust	6.31667	17.6167
853	Desert Locust	58.5469	22.6903
854	Desert Locust	6.15	17.45
855	Desert Locust	5.96667	17.4333
856	Desert Locust	4.95	17.5333
857	Desert Locust	7.66667	18.0167
858	Desert Locust	6.68333	19.0333
859	Desert Locust	6.9	19.4667
860	Desert Locust	64.0833	26.05
861	Desert Locust	63.6833	26.2
862	Desert Locust	70.6333	27.6833
863	Desert Locust	71.75	28.8833
864	Desert Locust	69.4333	27.0667
865	Desert Locust	66.1833	25.6167
866	Desert Locust	64.9	26.1167
867	Desert Locust	63.0167	27.8833
868	Desert Locust	62.5	26.4167
869	Desert Locust	70.25	25.3333
870	Desert Locust	66.9333	25.5167
871	Desert Locust	45.5	14.9667
872	Desert Locust	44.6167	16
873	Desert Locust	45.3336	15.4211
874	Desert Locust	44.2094	15.3614
875	Desert Locust	44.3925	14.5503
876	Desert Locust	70.2667	27.9667
877	Desert Locust	71.2667	27.8667
878	Desert Locust	69.8167	27.6167
879	Desert Locust	70.0833	24.2167
880	Desert Locust	66.7	25.9167
881	Desert Locust	69.5667	27.6167
882	Desert Locust	72.25	28.5
883	Desert Locust	69.7333	23.8333
884	Desert Locust	69.6625	23.2517
885	Desert Locust	72.1333	26.35
886	Desert Locust	-2.23333	15.3667
887	Desert Locust	-1.71667	15.3167
888	Desert Locust	-2.98333	15.9167
889	Desert Locust	73.5667	27.1
890	Desert Locust	2.45	16.95
891	Desert Locust	-2.78333	16
892	Desert Locust	-1.73333	16.1667
893	Desert Locust	-3.11667	16.5
894	Desert Locust	2.43333	16.8833
895	Desert Locust	73.1667	28.3667
896	Desert Locust	72.5167	27.3167
897	Desert Locust	71.6	26.3333
898	Desert Locust	72.4167	27.7333
899	Desert Locust	70.9167	26.3667
900	Desert Locust	73.45	28.0667
901	Desert Locust	73.1	27.5
902	Desert Locust	2.68333	19.7167
903	Desert Locust	2.76667	16.8667
904	Desert Locust	0.95	20.3
905	Desert Locust	2.66667	19.65
906	Desert Locust	3.1	17.75
907	Desert Locust	2.2	17.6
908	Desert Locust	1.01667	20.3333
909	Desert Locust	2.7	19.85
910	Desert Locust	70.6333	25.75
911	Desert Locust	3.55	18.4167
912	Desert Locust	1.1	17.8833
913	Desert Locust	2.46667	17.3333
914	Desert Locust	3.13333	17.2667
915	Desert Locust	2.05	17.7
916	Desert Locust	2.86667	17.5833
917	Desert Locust	72.8667	28.1333
918	Desert Locust	72.3333	27.3333
919	Desert Locust	70.9128	26.9117
920	Desert Locust	1.14889	27.8031
921	Desert Locust	-0.16667	28.2167
922	Desert Locust	5.18333	26.65
923	Desert Locust	73.0167	29.1167
924	Desert Locust	5	21
925	Desert Locust	71.0608	25.4811
926	Desert Locust	72.7167	28.0667
927	Desert Locust	74.1667	28.95
928	Desert Locust	72.8833	26.4167
929	Desert Locust	72.3	28.35
930	Desert Locust	73.0667	27.5333
931	Desert Locust	72.7667	23.4667
932	Desert Locust	74.65	27.5
933	Desert Locust	73.3	28.1333
934	Desert Locust	72.8064	28.5064
935	Desert Locust	-13.5833	17.7333
936	Desert Locust	-13.5333	17.5667
937	Desert Locust	-13.45	17.4667
938	Desert Locust	-13.1167	17.6667
939	Desert Locust	-14.4	18.5833
940	Desert Locust	-13.3	17.5667
941	Desert Locust	-14.4667	18.5167
942	Desert Locust	-14.6333	18.5
943	Desert Locust	-14.0833	19.8833
944	Desert Locust	-13.25	17.4833
945	Desert Locust	-14.6167	18.5667
946	Desert Locust	-13.1	17.5333
947	Desert Locust	-13.7333	19.4667
948	Desert Locust	-10.3167	17.25
949	Desert Locust	-14.4	19.05
950	Desert Locust	-10.35	17.4167
951	Desert Locust	-13.9333	17.4
952	Desert Locust	-13.0833	18.5833
953	Desert Locust	-13.8167	17.6667
954	Desert Locust	-13.6333	17.05
955	Desert Locust	-13.1333	19.0833
956	Desert Locust	-13.0833	19.1333
957	Desert Locust	-13.85	17.7333
958	Desert Locust	-12.8333	18.7
959	Desert Locust	37.717	18.35
960	Desert Locust	-14.1	18.6167
961	Desert Locust	-14.2333	18.65
962	Desert Locust	-14.4667	19.3333
963	Desert Locust	-13.9833	18.8167
964	Desert Locust	-13.7167	19.2
965	Desert Locust	-14.6333	19.1167
966	Desert Locust	-12.75	18.5
967	Desert Locust	-13.2833	18.6
968	Desert Locust	-13.85	17.4
969	Desert Locust	-12.3333	20.5
970	Desert Locust	-13.0333	18.5667
971	Desert Locust	-13.4333	18.5667
972	Desert Locust	-13.2333	18.9
973	Desert Locust	-13.4167	18.9667
974	Desert Locust	-13.25	19.0167
975	Desert Locust	-13.6	18.9667
976	Desert Locust	-13.7167	18.9333
977	Desert Locust	-13.7833	18.9833
978	Desert Locust	-12.933	18.367
979	Desert Locust	72.15	27.75
980	Desert Locust	39.75	21.333
981	Desert Locust	44.367	12.75
982	Desert Locust	6.05	17.333
983	Desert Locust	40.167	20.5
984	Desert Locust	20	15.783
985	Desert Locust	21.117	15.967
986	Desert Locust	17.417	15.033
987	Desert Locust	43.35	14.283
988	Desert Locust	37.283	19.133
989	Desert Locust	23.75	15.067
990	Desert Locust	35.633	20.133
991	Desert Locust	37.65	18.383
992	Desert Locust	-8.417	16.75
993	Desert Locust	70.55	25.417
994	Desert Locust	57.667	23.667
995	Desert Locust	37.75	18.367
996	Desert Locust	37.617	18.267
997	Desert Locust	37.4	18.7
998	Desert Locust	-14.767	19.767
999	Desert Locust	-9.417	16.8
1000	Desert Locust	41.233	18.8
1001	Desert Locust	18	15.75
1002	Desert Locust	17.733	19.25
1003	Desert Locust	37.717	18.2
1004	Desert Locust	5.817	18.65
1005	Desert Locust	-9.917	17.133
1006	Desert Locust	36.45	22.333
1007	Desert Locust	73.767	28.35
1008	Desert Locust	38.367	17.883
1009	Desert Locust	38.367	17.867
1010	Desert Locust	38.85	16.4
1011	Desert Locust	-11.517	21.05
1012	Desert Locust	20.683	15.917
1013	Desert Locust	19.367	15.75
1014	Desert Locust	33.667	24.333
1015	Desert Locust	70.464	25.699
1016	Desert Locust	44.617	16
1017	Desert Locust	38.35	17.767
1018	Desert Locust	42.933	10.517
1019	Desert Locust	3.65	15.267
1020	Desert Locust	-14.317	19.8
1021	Desert Locust	-10.583	21.033
1022	Desert Locust	-6.75	17.3
1023	Desert Locust	20.7	15.767
1024	Desert Locust	17.217	14.417
1025	Desert Locust	44.2	12.967
1026	Desert Locust	23.25	15.1
1027	Desert Locust	7.983	16.967
1028	Desert Locust	-11.5	21.05
1029	Desert Locust	-11.6	18.333
1030	Desert Locust	-12.9	18.433
1031	Desert Locust	-7.417	16.883
1032	Desert Locust	17.5	17.583
1033	Desert Locust	20.25	15.733
1034	Desert Locust	39.183	15.9
1035	Desert Locust	74.15	27.95
1036	Desert Locust	43.3	14.683
1037	Desert Locust	38.35	17.733
1038	Desert Locust	4.017	14.833
1039	Desert Locust	17.367	14.85
1040	Desert Locust	35.367	23.017
1041	Desert Locust	40.583	20.167
1042	Desert Locust	25.367	13.617
1043	Desert Locust	-10.133	17.1
1044	Desert Locust	-0.233	27.883
1045	Desert Locust	20.9	15.905
1046	Desert Locust	46.717	13.517
1047	Desert Locust	-10.05	17.1
1048	Desert Locust	17.289	18.622
1049	Desert Locust	43.217	14.917
1050	Desert Locust	35.667	20.017
1051	Desert Locust	38.417	17.917
1052	Desert Locust	-11.933	23.2
1053	Desert Locust	-14.333	19.067
1054	Desert Locust	-8.5	16.833
1055	Desert Locust	-14.05	18.817
1056	Desert Locust	39.75	21.3333
1057	Desert Locust	40.3333	20.3333
1058	Desert Locust	39.5	15.333
1059	Desert Locust	37.733	18.333
1060	Desert Locust	39.233	15.767
1061	Desert Locust	-12.433	20.85
1062	Desert Locust	-12.183	18.567
1063	Desert Locust	-11.05	16.733
1064	Desert Locust	-15.533	17.733
1065	Desert Locust	41.5	19.167
1066	Desert Locust	17.033	20.45
1067	Desert Locust	66.183	25.617
1068	Desert Locust	37.683	18.333
1069	Desert Locust	36.05	21.367
1070	Desert Locust	-12.833	22.6
1071	Desert Locust	-14.417	19.767
1072	Desert Locust	39.133	21.917
1073	Desert Locust	38.35	17.8
1074	Desert Locust	6.067	17.633
1075	Desert Locust	-9.667	16.95
1076	Desert Locust	-15.517	17.883
1077	Desert Locust	20.867	15.733
1078	Desert Locust	44.033	12.633
1079	Desert Locust	38.367	17.8
1080	Desert Locust	63.067	25.983
1081	Desert Locust	66.617	25.8
1082	Desert Locust	70.3	28.417
1083	Desert Locust	69.083	25.55
1084	Desert Locust	5.833	18.033
1085	Desert Locust	-13.483	20.183
1086	Desert Locust	-14.017	19.633
1087	Desert Locust	-13.2	21.117
1088	Desert Locust	-7.667	16.667
1089	Desert Locust	-7.267	17.333
1090	Desert Locust	-11.667	17.883
1091	Desert Locust	-9.05	16.933
1092	Desert Locust	-7.667	16.783
1093	Desert Locust	-11.417	17.167
1094	Desert Locust	-13.15	18.267
1095	Desert Locust	-12.533	17.65
1096	Desert Locust	-15.7	16.933
1097	Desert Locust	10.2	31.733
1098	Desert Locust	71.65	27.117
1099	Desert Locust	72.917	27.833
1100	Desert Locust	66.6669	25.8
1101	Desert Locust	72.033	28.5
1102	Desert Locust	43	15.317
1103	Desert Locust	42.7	15.683
1104	Desert Locust	37.15	19.45
1105	Desert Locust	37.683	18.35
1106	Desert Locust	37.183	19.3
1107	Desert Locust	-0.05	16.3
1108	Desert Locust	-8.667	16.967
1109	Desert Locust	-11.183	17.167
1110	Desert Locust	-11.117	16.7
1111	Desert Locust	-13.033	18.35
1112	Desert Locust	-11.817	17.983
1113	Desert Locust	20.817	15.767
1114	Desert Locust	39.5	15.383
1115	Desert Locust	39.167	15.917
1116	Desert Locust	73.75	29.483
1117	Desert Locust	64.1	26.967
1118	Desert Locust	69.333	27.167
1119	Desert Locust	73.367	28.017
1120	Desert Locust	63.317	25.517
1121	Desert Locust	68.517	26.817
1122	Desert Locust	70.217	25.667
1123	Desert Locust	37.3	19.883
1124	Desert Locust	39.8333	21.4833
1125	Desert Locust	41	19.95
1126	Desert Locust	41.2833	18.95
1127	Desert Locust	74.95	28.3
1128	Desert Locust	71.683	29.4
1129	Desert Locust	70.017	27.583
1130	Desert Locust	70.2	26.1
1131	Desert Locust	69.917	25.55
1132	Desert Locust	-15.867	17.25
1133	Desert Locust	-14.25	17.433
1134	Desert Locust	22	27.75
1135	Desert Locust	6.25	26.833
1136	Desert Locust	37.767	18.333
1137	Desert Locust	37.75	18.333
1138	Desert Locust	38.367	17.683
1139	Desert Locust	6.083	17.467
1140	Desert Locust	-14.3	19.933
1141	Desert Locust	-14.383	19.4
1142	Desert Locust	-13.55	20.167
1143	Desert Locust	-9.633	17.333
1144	Desert Locust	-5.917	16.817
1145	Desert Locust	-7.5	16.867
1146	Desert Locust	-11.917	18.55
1147	Desert Locust	-11.2	16.7
1148	Desert Locust	-10.5	18.5
1149	Desert Locust	0.7	17.5
1150	Desert Locust	-15.583	23.55
1151	Desert Locust	-4.967	31.633
1152	Desert Locust	38.45	17.917
1153	Desert Locust	5.5	18.167
1154	Desert Locust	-12.433	21.133
1155	Desert Locust	-13.333	20.883
1156	Desert Locust	-6	17
1157	Desert Locust	-6.383	17.183
1158	Desert Locust	-12.3	17.95
1159	Desert Locust	-11.35	16.767
1160	Desert Locust	-13.133	17.717
1161	Desert Locust	-10.75	16.5
1162	Desert Locust	-12.933	18.383
1163	Desert Locust	-7.33306	16.8
1164	Desert Locust	-10.617	18.933
1165	Desert Locust	36.35	22.35
1166	Desert Locust	70.25	26.033
1167	Desert Locust	70.667	26.5
1168	Desert Locust	70.5	26.917
1169	Desert Locust	65.283	27.217
1170	Desert Locust	62.333	25.85
1171	Desert Locust	69.767	26.167
1172	Desert Locust	69.0831	25.55
1173	Desert Locust	70.9	26.917
1174	Desert Locust	62.317	25.117
1175	Desert Locust	63.467	25.267
1176	Desert Locust	71.2169	27.8669
1177	Desert Locust	71.383	25.75
1178	Desert Locust	73.3	28.017
1179	Desert Locust	72.617	26.983
1180	Desert Locust	64.233	26.033
1181	Desert Locust	64.533	26.467
1182	Desert Locust	67.25	25.883
1183	Desert Locust	71.383	28.067
1184	Desert Locust	38.35	17.917
1185	Desert Locust	37.783	18.333
1186	Desert Locust	37.7	18.367
1187	Desert Locust	68.9	27.7
1188	Desert Locust	6.117	18.3
1189	Desert Locust	-14.533	19.3
1190	Desert Locust	-11.833	22.333
1191	Desert Locust	-12.85	21.6
1192	Desert Locust	-8.967	16.3
1193	Desert Locust	-7.333	17.333
1194	Desert Locust	-11.55	16.917
1195	Desert Locust	-11.983	17.817
1196	Desert Locust	-9.25	16.8
1197	Desert Locust	-11.383	17.033
1198	Desert Locust	-13.083	18.283
1199	Desert Locust	-14.033	18.617
1200	Desert Locust	-14.983	17.25
1201	Desert Locust	10.383	32.033
1202	Desert Locust	17.55	18.667
1203	Desert Locust	39.281	15.802
1204	Desert Locust	71.133	27.9
1205	Desert Locust	9.767	31.467
1206	Desert Locust	38.4	17.983
1207	Desert Locust	38.417	17.833
1208	Desert Locust	-14.3	19.9
1209	Desert Locust	-12.833	19.833
1210	Desert Locust	-8.75	16.967
1211	Desert Locust	-7.25	17.417
1212	Desert Locust	-12.033	17.067
1213	Desert Locust	-11.25	16.75
1214	Desert Locust	-13.2	17.917
1215	Desert Locust	-6.467	17.25
1216	Desert Locust	-14.517	17.667
1217	Desert Locust	74.283	25.65
1218	Desert Locust	73.733	28.5
1219	Desert Locust	70.567	26.867
1220	Desert Locust	61.783	25.533
1221	Desert Locust	62.217	25.883
1222	Desert Locust	70	25.733
1223	Desert Locust	43.383	14.517
1224	Desert Locust	37.367	19.117
1225	Desert Locust	37.75	18.383
1226	Desert Locust	38.383	17.85
1227	Desert Locust	-14.55	19.3
1228	Desert Locust	-8.367	17.133
1229	Desert Locust	-13.3	18.083
1230	Desert Locust	-6.75	17.05
1231	Desert Locust	-12.517	17.433
1232	Desert Locust	-13.1	17.5
1233	Desert Locust	-12.517	17.5
1234	Desert Locust	-13.1331	18.95
1235	Desert Locust	-6.917	16.8
1236	Desert Locust	-13.883	18.633
1237	Desert Locust	-8.167	16.25
1238	Desert Locust	-15.55	23.55
1239	Desert Locust	-4.083	32.317
1240	Desert Locust	72.8	28.517
1241	Desert Locust	73.183	27.367
1242	Desert Locust	72.3	27.5
1243	Desert Locust	71.783	27.033
1244	Desert Locust	63.133	25.45
1245	Desert Locust	63.383	26.65
1246	Desert Locust	70.75	24.517
1247	Desert Locust	58.5	23.25
1248	Desert Locust	44.4167	12.7
1249	Desert Locust	43.5	14.517
1250	Desert Locust	38.4	17.867
1251	Desert Locust	37.133	19.883
1252	Desert Locust	37.783	18.3
1253	Desert Locust	42.817	15.867
1254	Desert Locust	-7.383	17.067
1255	Desert Locust	-5.033	31.467
1256	Desert Locust	37.433	18.617
1257	Desert Locust	37.817	18.317
1258	Desert Locust	5.8	17.633
1259	Desert Locust	-8.417	16.667
1260	Desert Locust	-6.367	17.15
1261	Desert Locust	-7.033	17.3
1262	Desert Locust	-13.1	17.533
1263	Desert Locust	-8.417	16.6
1264	Desert Locust	-12.667	17.383
1265	Desert Locust	-13.917	18.75
1266	Desert Locust	-6.5	16.833
1267	Desert Locust	-10.567	18.817
1268	Desert Locust	16.167	20.567
1269	Desert Locust	72.317	25.983
1270	Desert Locust	72.8	28.567
1271	Desert Locust	70.983	26.817
1272	Desert Locust	63.55	26.717
1273	Desert Locust	71.217	27.867
1274	Desert Locust	41.533	19.167
1275	Desert Locust	43.033	15.017
1276	Desert Locust	-8.067	16.967
1277	Desert Locust	-11.2	16.6
1278	Desert Locust	-13.917	18.817
1279	Desert Locust	-6.433	16.967
1280	Desert Locust	-13.633	18.783
1281	Desert Locust	-7.3	17.033
1282	Desert Locust	-12.85	18.383
1283	Desert Locust	-15.633	23.4
1284	Desert Locust	-3.417	32.533
1285	Desert Locust	43.033	15.617
1286	Desert Locust	37.4	18.75
1287	Desert Locust	37.75	18.467
1288	Desert Locust	5.833	18.417
1289	Desert Locust	-12.883	21.8
1290	Desert Locust	-13.4831	20.1831
1291	Desert Locust	-6.317	17.1
1292	Desert Locust	-6.933	17.383
1293	Desert Locust	-12.483	17.567
1294	Desert Locust	-13.117	17.533
1295	Desert Locust	33.6669	25.2
1296	Desert Locust	72.317	25.583
1297	Desert Locust	72.017	26.6
1298	Desert Locust	70.183	26.7
1299	Desert Locust	64.217	26.05
1300	Desert Locust	65.6	26.5
1301	Desert Locust	72.667	28.967
1302	Desert Locust	66.6169	25.8
1303	Desert Locust	71.6831	29.4
1304	Desert Locust	70.033	26.15
1305	Desert Locust	39.067	15.867
1306	Desert Locust	10.117	25
1307	Desert Locust	-5.183	31.433
1308	Desert Locust	37.633	18.3
1309	Desert Locust	38.367	17.85
1310	Desert Locust	-13.617	20.2
1311	Desert Locust	-9.5	17.417
1312	Desert Locust	-6.3	15.867
1313	Desert Locust	-7.317	17.167
1314	Desert Locust	-11.85	18.617
1315	Desert Locust	-11.55	16.983
1316	Desert Locust	-8.8	16.883
1317	Desert Locust	-11.45	17.317
1318	Desert Locust	-11.067	16.65
1319	Desert Locust	-13.033	18.3
1320	Desert Locust	-12.133	18.083
1321	Desert Locust	-15.917	16.967
1322	Desert Locust	71.5	24.75
1323	Desert Locust	73.883	28.383
1324	Desert Locust	70.6	25.5
1325	Desert Locust	43	15.733
1326	Desert Locust	37.033	19.95
1327	Desert Locust	36.883	18.633
1328	Desert Locust	37.8	18.383
1329	Desert Locust	10.367	32.25
1330	Desert Locust	-11.533	21.017
1331	Desert Locust	-12.8669	21.2669
1332	Desert Locust	-7.867	16.7
1333	Desert Locust	-7.167	17.5
1334	Desert Locust	-12.083	18.55
1335	Desert Locust	-9.35	16.783
1336	Desert Locust	-7.5	16.75
1337	Desert Locust	-11.417	16.75
1338	Desert Locust	-13.867	17.333
1339	Desert Locust	-13.117	17.8
1340	Desert Locust	-10.883	16.55
1341	Desert Locust	-11.55	18.35
1342	Desert Locust	36.3	22.5
1343	Desert Locust	70.75	25.35
1344	Desert Locust	71.667	27.783
1345	Desert Locust	70.517	26.833
1346	Desert Locust	62.933	25.833
1347	Desert Locust	70.05	28
1348	Desert Locust	71.65	28.317
1349	Desert Locust	36.05	21.717
1350	Desert Locust	37.667	18.317
1351	Desert Locust	-13.217	18.083
1352	Desert Locust	-6.417	17.083
1353	Desert Locust	-14.5	17.567
1354	Desert Locust	70.367	26.65
1355	Desert Locust	66.95	25.55
1356	Desert Locust	64.783	26.933
1357	Desert Locust	70.383	25.733
1358	Desert Locust	43.117	16.017
1359	Desert Locust	-1.233	32.1
1360	Desert Locust	-5.55	31.533
1361	Desert Locust	5.2	18.167
1362	Desert Locust	-14.517	19.317
1363	Desert Locust	-13.717	19.817
1364	Desert Locust	-13.1	18.3
1365	Desert Locust	-6.417	17.2
1366	Desert Locust	-7.95	16.6
1367	Desert Locust	65.417	28.583
1368	Desert Locust	70.05	28.117
1369	Desert Locust	-7.25	16.617
1370	Desert Locust	-13.033	18.333
1371	Desert Locust	-13.133	17.833
1372	Desert Locust	72.033	28.333
1373	Desert Locust	74.117	28.417
1374	Desert Locust	0.4	17.417
1375	Desert Locust	-14.6	24.5
1376	Desert Locust	-4.95	31.817
1377	Desert Locust	-15.55	17.25
1378	Desert Locust	-14.467	19.433
1379	Desert Locust	11	31.867
1380	Desert Locust	-4.4	31.117
1381	Desert Locust	37.8	18.283
1382	Desert Locust	37.333	19.15
1383	Desert Locust	37.467	18.4
1384	Desert Locust	-14.183	19.917
1385	Desert Locust	-13	20.5
1386	Desert Locust	-14.383	19.894
1387	Desert Locust	-12.583	18.367
1388	Desert Locust	-5.7	15.867
1389	Desert Locust	-7.25	17.167
1390	Desert Locust	-11.6	18.533
1391	Desert Locust	-11.367	16.983
1392	Desert Locust	-8.833	16.9
1393	Desert Locust	-11.183	17.367
1394	Desert Locust	-11.05	16.617
1395	Desert Locust	-12.933	18.25
1396	Desert Locust	-12.317	17.9
1397	Desert Locust	34.6669	23.55
1398	Desert Locust	70.5	26.833
1399	Desert Locust	62.217	25.55
1400	Desert Locust	65.067	27.817
1401	Desert Locust	69.83	27.468
1402	Desert Locust	69.417	27.167
1403	Desert Locust	66.417	26.467
1404	Desert Locust	-7.75	26.95
1405	Desert Locust	45	10.417
1406	Desert Locust	5.917	18.333
1407	Desert Locust	-14.233	19.867
1408	Desert Locust	-10.6	21.55
1409	Desert Locust	-9.583	17.083
1410	Desert Locust	-5.867	16.633
1411	Desert Locust	-7.783	16.833
1412	Desert Locust	-12.033	18.567
1413	Desert Locust	-11.383	16.7
1414	Desert Locust	-11.117	16.767
1415	Desert Locust	-12.833	18.333
1416	Desert Locust	-11.6	18.2
1417	Desert Locust	-15.917	17.133
1418	Desert Locust	39.45	15.533
1419	Desert Locust	74.017	28.45
1420	Desert Locust	71.333	28.333
1421	Desert Locust	70.783	28.317
1422	Desert Locust	33.433	16.7
1423	Desert Locust	37.85	18.367
1424	Desert Locust	-13.75	17.317
1425	Desert Locust	-10.967	16.567
1426	Desert Locust	-7.417	16.833
1427	Desert Locust	-11.333	18.5
1428	Desert Locust	20.867	16.008
1429	Desert Locust	73.767	28.183
1430	Desert Locust	71.5	28.5
1431	Desert Locust	69.867	27.517
1432	Desert Locust	35.717	20.067
1433	Desert Locust	37.8	18.333
1434	Desert Locust	5.933	17.4
1435	Desert Locust	5.917	18.5
1436	Desert Locust	-11.383	21.017
1437	Desert Locust	-13.967	21.133
1438	Desert Locust	-6.167	17.05
1439	Desert Locust	-6.383	17.167
1440	Desert Locust	-11.283	16.75
1441	Desert Locust	-12.35	17.833
1442	Desert Locust	-11.317	16.817
1443	Desert Locust	-13.083	17.55
1444	Desert Locust	-10.95	16.55
1445	Desert Locust	-12.967	18.367
1446	Desert Locust	-11.05	18.567
1447	Desert Locust	34.1331	23.1331
1448	Desert Locust	70.25	26.35
1449	Desert Locust	73.033	28.117
1450	Desert Locust	70.5	25.833
1451	Desert Locust	37.083	17.05
1452	Desert Locust	-12.833	18.167
1453	Desert Locust	-12.8	26.883
1454	Desert Locust	-4.467	32.217
1455	Desert Locust	37.883	18.3
1456	Desert Locust	5.7	18.767
1457	Desert Locust	-11.6169	20.9331
1458	Desert Locust	-6.3	17.083
1459	Desert Locust	-6.667	17.033
1460	Desert Locust	-12.433	17.383
1461	Desert Locust	-13.15	17.533
1462	Desert Locust	-7.983	16.7
1463	Desert Locust	-12.483	17.55
1464	Desert Locust	-13.267	18.983
1465	Desert Locust	-7.467	16.817
1466	Desert Locust	-13.75	18.65
1467	Desert Locust	16.733	20.033
1468	Desert Locust	73.05	27.65
1469	Desert Locust	71.8	26.917
1470	Desert Locust	64.467	26.05
1471	Desert Locust	71.967	28.2
1472	Desert Locust	69.517	27.317
1473	Desert Locust	37.3	18.983
1474	Desert Locust	-4.467	31.917
1475	Desert Locust	-6.917	30.917
1476	Desert Locust	5.55	18.733
1477	Desert Locust	-14.517	19.65
1478	Desert Locust	-12.717	18.533
1479	Desert Locust	-11.367	17.367
1480	Desert Locust	-6.467	17.233
1481	Desert Locust	-11.7	18.333
1482	Desert Locust	38.417	17.867
1483	Desert Locust	38.417	17.85
1484	Desert Locust	-11.3	21.217
1485	Desert Locust	37.75	18.283
1486	Desert Locust	39.667	20.583
1487	Desert Locust	43.283	15.05
1488	Desert Locust	12.083	13.317
1489	Desert Locust	-11.15	16.9
1490	Desert Locust	-0.05	27.6
1491	Desert Locust	37.333	18.937
1492	Desert Locust	32.833	23.533
1493	Desert Locust	72.133	29.017
1494	Desert Locust	34.083	23.667
1495	Desert Locust	69.183	26.817
1496	Desert Locust	-0.217	28.217
1497	Desert Locust	-16.217	15.617
1498	Desert Locust	11.367	13.4
1499	Desert Locust	34.667	23.75
1500	Desert Locust	34.5	24.033
1501	Desert Locust	70.483	28.267
1502	Desert Locust	26.017	14.617
1503	Desert Locust	30.39	14.348
1504	Desert Locust	38.333	17.746
1505	Desert Locust	32.833	23.25
1506	Desert Locust	12.217	13.25
1507	Desert Locust	-14.95	16.667
1508	Desert Locust	37.333	18.982
1509	Desert Locust	34.75	23.583
1510	Desert Locust	-16.167	15.833
1511	Desert Locust	11.483	13.25
1512	Desert Locust	-16.5	16.033
1513	Desert Locust	22.0831	14.5169
1514	Desert Locust	-15.567	16.167
1515	Desert Locust	-17.417	14.683
1516	Desert Locust	11.35	13.383
1517	Desert Locust	-0.267	27.767
1518	Desert Locust	-16.117	16.117
1519	Desert Locust	-16.25	16.017
1520	Desert Locust	-0.3	27.883
1521	Desert Locust	-16.067	14.15
1522	Desert Locust	-15.833	16.267
1523	Desert Locust	31.833	22.5
1524	Desert Locust	37.357	19.105
1525	Desert Locust	38.333	17.764
1526	Desert Locust	38.333	17.845
1527	Desert Locust	42.5333	16.9
1528	Desert Locust	39.2667	22.5333
1529	Desert Locust	39.2	25.7
1530	Desert Locust	40.45	25.9667
1531	Desert Locust	40.8667	25.9833
1532	Desert Locust	31.833	16.1
1533	Desert Locust	-11.609	17.059
1534	Desert Locust	-15.983	16.1
1535	Desert Locust	37.307	19.055
1536	Desert Locust	45.733	14.783
1537	Desert Locust	45.717	14.983
1538	Desert Locust	65.917	29.633
1539	Desert Locust	73.4	28
1540	Desert Locust	39.383	15.717
1541	Desert Locust	38.75	16.25
1542	Desert Locust	47.117	10.75
1543	Desert Locust	11.683	13.583
1544	Desert Locust	7.5	18.083
1545	Desert Locust	-14.983	16.667
1546	Desert Locust	-15.683	16.467
1547	Desert Locust	-14.525	16.609
1548	Desert Locust	-14.817	16.65
1549	Desert Locust	-1.433	32.067
1550	Desert Locust	16.533	19.117
1551	Desert Locust	18.517	16.9
1552	Desert Locust	20.6	15.65
1553	Desert Locust	17	21.417
1554	Desert Locust	20.917	15.75
1555	Desert Locust	17.367	15.017
1556	Desert Locust	2.267	16.5
1557	Desert Locust	0.017	20.283
1558	Desert Locust	0.883	20.317
1559	Desert Locust	-9.617	16.667
1560	Desert Locust	-11.667	17.7
1561	Desert Locust	-12.167	21.65
1562	Desert Locust	2.883	24.733
1563	Desert Locust	-14.2	22.567
1564	Desert Locust	-1.95	32.533
1565	Desert Locust	25.617	14.5
1566	Desert Locust	37.417	18.75
1567	Desert Locust	45.05	16.883
1568	Desert Locust	33.8167	15.9
1569	Desert Locust	33.3167	15.4167
1570	Desert Locust	32.3833	15.8333
1571	Desert Locust	33.1167	15.5333
1572	Desert Locust	33.4167	15.8
1573	Desert Locust	-11.5833	18.2
1574	Desert Locust	35.9225	21.1047
1575	Desert Locust	20.9167	15.8167
1576	Desert Locust	20.9	15.7411
1577	Desert Locust	1.46667	19.4833
1578	Desert Locust	2.36667	18.3833
1579	Desert Locust	1.75	19.6167
1580	Desert Locust	38.2953	14.2219
1581	Desert Locust	20.9	15.6447
1582	Desert Locust	20.9942	15.8333
1583	Desert Locust	20.9	15.7911
1584	Desert Locust	21.0678	15.8333
1585	Desert Locust	20.9	15.7536
1586	Desert Locust	21.0856	15.8333
1587	Desert Locust	45.3331	15.4167
1588	Desert Locust	42.75	18.3333
1589	Desert Locust	41.5	18.75
1590	Desert Locust	-9.61722	16.5931
1591	Desert Locust	-11.5833	18.0167
1592	Desert Locust	-12.0247	22.8556
1593	Desert Locust	-12.0667	23.4333
1594	Desert Locust	4.01667	22.8333
1595	Desert Locust	3.16667	23.45
1596	Desert Locust	21.0053	15.8414
1597	Desert Locust	21.0614	15.8414
1598	Desert Locust	39.2	21.4833
1599	Desert Locust	40.5333	12.95
1600	Desert Locust	31.6167	14.1167
1601	Desert Locust	32.1833	13.75
1602	Desert Locust	20.9606	15.8758
1603	Desert Locust	20.9	16.2881
1604	Desert Locust	20.9364	15.8056
1605	Desert Locust	20.9483	15.8047
1606	Desert Locust	20.7833	16.2667
1607	Desert Locust	18.4217	20.0178
1608	Desert Locust	22.25	15.1167
1609	Desert Locust	2.35	18.3667
1610	Desert Locust	1.6	19.7667
1611	Desert Locust	1.58333	19.7667
1612	Desert Locust	1.73333	19.8167
1613	Desert Locust	1.65	19.4167
1614	Desert Locust	1.8	19.6333
1615	Desert Locust	1.7	19.65
1616	Desert Locust	39.1667	11.1667
1617	Desert Locust	39.7	11.7
1618	Desert Locust	39.0292	15.1914
1619	Desert Locust	37.5911	15.1139
1620	Desert Locust	38.7764	14.8528
1621	Desert Locust	20.8944	15.7756
1622	Desert Locust	-11	18.65
1623	Desert Locust	-12.7667	23.6
1624	Desert Locust	39.4667	15.6167
1625	Desert Locust	39.4	12.9667
1626	Desert Locust	40.5	13.75
1627	Desert Locust	40.9639	11.6614
1628	Desert Locust	41.3133	11.9508
1629	Desert Locust	39.0667	15.1833
1630	Desert Locust	4.08333	18.3667
1631	Desert Locust	0.78333	19.7167
1632	Desert Locust	2.58333	17.6
1633	Desert Locust	4.15	18.3833
1634	Desert Locust	38	18.3333
1635	Desert Locust	36.5667	16.9167
1636	Desert Locust	35.9167	17.0833
1637	Desert Locust	33.25	16.9167
1638	Desert Locust	20.0031	15.8333
1639	Desert Locust	21.035	15.8333
1640	Desert Locust	20.9464	15.8333
1641	Desert Locust	22.5611	15.4958
1642	Desert Locust	22.4489	15.3544
1643	Desert Locust	22.4489	15.3972
1644	Desert Locust	-11.8333	18.1667
1645	Desert Locust	-12.25	18.6667
1646	Desert Locust	-9.49583	18.44
1647	Desert Locust	-13.05	20.0333
1648	Desert Locust	8.58333	19.1667
1649	Desert Locust	-11.5833	17.8333
1650	Desert Locust	-11.5833	25.2333
1651	Desert Locust	-11.7236	18.5575
1652	Desert Locust	21.04	15.8475
1653	Desert Locust	1.5	19.4333
1654	Desert Locust	1.4	19.8667
1655	Desert Locust	-13.9	18.85
1656	Desert Locust	-14	18.6167
1657	Desert Locust	-11.8167	17.3
1658	Desert Locust	-11.6667	16.8333
1659	Desert Locust	-13.8333	18.9889
1660	Desert Locust	32.75	17.75
1661	Desert Locust	32.75	17.25
1662	Desert Locust	32.6667	17.1667
1663	Desert Locust	31.5667	15.4833
1664	Desert Locust	31.5333	15.4833
1665	Desert Locust	31.8	16.35
1666	Desert Locust	31.5833	14.25
1667	Desert Locust	31.9	14.3667
1668	Desert Locust	32.1333	13.8167
1669	Desert Locust	66.2219	25.6711
1670	Desert Locust	63.4833	25.35
1671	Desert Locust	63.4167	25.2833
1672	Desert Locust	65.1167	28.5833
1673	Desert Locust	66.3	27.9833
1674	Desert Locust	62.1167	25.6
1675	Desert Locust	35.5333	18.2667
1676	Desert Locust	35.8667	17.55
1677	Desert Locust	36.0833	17.3333
1678	Desert Locust	35.4833	18.35
1679	Desert Locust	33.8333	17.5
1680	Desert Locust	34.5	17.3333
1681	Desert Locust	39.4167	15.7
1682	Desert Locust	39.4	15.8333
1683	Desert Locust	38.8333	15.8333
1684	Desert Locust	38.3	17.9
1685	Desert Locust	24.25	15.25
1686	Desert Locust	31.4167	22.3333
1687	Desert Locust	30.6	24.6667
1688	Desert Locust	-10.5833	15.1167
1689	Desert Locust	0.8	19.5
1690	Desert Locust	8.66667	19.5
1691	Desert Locust	8.88333	18.4167
1692	Desert Locust	8.95	19.2
1693	Desert Locust	9.08333	19.0833
1694	Desert Locust	38.4167	17.7833
1695	Desert Locust	20.9	15.8333
1696	Desert Locust	21.5858	17.1931
1697	Desert Locust	19.6881	13.3031
1698	Desert Locust	18.3381	13.2144
1699	Desert Locust	19.6511	13.9453
1700	Desert Locust	0.43333	19.45
1701	Desert Locust	61.7558	25.0572
1702	Desert Locust	65.05	26.1167
1703	Desert Locust	64.1578	26.0606
1704	Desert Locust	64.1411	26.9797
1705	Desert Locust	66.0833	27.0833
1706	Desert Locust	66.4444	27.7556
1707	Desert Locust	65.3667	28.4833
1708	Desert Locust	64.8833	27.4167
1709	Desert Locust	66.7333	28.5167
1710	Desert Locust	32.9167	16.55
1711	Desert Locust	10.1753	31.0381
1712	Desert Locust	10.25	30.9167
1713	Desert Locust	10.1333	31.25
1714	Desert Locust	3.72333	35.9967
1715	Desert Locust	38.4167	17.8833
1716	Desert Locust	20.9	16.0256
1717	Desert Locust	20.4833	15.5086
1718	Desert Locust	29.1667	25.5
1719	Desert Locust	34.7989	23.4156
1720	Desert Locust	8.41667	19.3333
1721	Desert Locust	0.98917	20.2542
1722	Desert Locust	1.40306	18.8333
1723	Desert Locust	35.8167	20.4833
1724	Desert Locust	35.9833	20.5
1725	Desert Locust	-12.4	23.1833
1726	Desert Locust	54.3436	27.6842
1727	Desert Locust	-14.7167	19.5333
1728	Desert Locust	-12.5	22.7
1729	Desert Locust	68.75	26.8667
1730	Desert Locust	72.4667	28.7833
1731	Desert Locust	70.8075	27.8525
1732	Desert Locust	66.1667	27.9167
1733	Desert Locust	70.45	25.6667
1734	Desert Locust	49.8833	11.25
1735	Desert Locust	65.9167	28.9667
1736	Desert Locust	63.5	26.8
1737	Desert Locust	21.0028	15.85
1738	Desert Locust	20.9167	15.85
1739	Desert Locust	36.45	22.35
1740	Desert Locust	7.85	17.9
1741	Desert Locust	8.86667	18.5833
1742	Desert Locust	7.3	19.5833
1743	Desert Locust	7.75	18.6667
1744	Desert Locust	35.75	20.55
1745	Desert Locust	-12.0667	23.8667
1746	Desert Locust	-12.3333	23.0833
1747	Desert Locust	-12.0667	23.2
1748	Desert Locust	-12.0333	23.3
1749	Desert Locust	20.7611	15.8183
1750	Desert Locust	20.9633	15.8872
1751	Desert Locust	20.9711	15.8928
1752	Desert Locust	20.9475	15.8031
1753	Desert Locust	21.1331	15.8581
1754	Desert Locust	8.66667	18.6667
1755	Desert Locust	6.33333	18.15
1756	Desert Locust	6.5	18.0333
1757	Desert Locust	37.5	16
1758	Desert Locust	29.1667	14.8333
1759	Desert Locust	30.1833	13.25
1760	Desert Locust	30.75	17.5167
1761	Desert Locust	30.7833	17.65
1762	Desert Locust	30.3667	16.6667
1763	Desert Locust	34.2167	18.4
1764	Desert Locust	32.75	17.7167
1765	Desert Locust	32.15	17.6833
1766	Desert Locust	12	30
1767	Desert Locust	2.75	17.6333
1768	Desert Locust	0.56667	19.5167
1769	Desert Locust	2.4	18.4167
1770	Desert Locust	0.58333	19.4167
1771	Desert Locust	0.58333	19.5667
1772	Desert Locust	0.5	19.3333
1773	Desert Locust	2.35	18.35
1774	Desert Locust	2.41667	18.35
1775	Desert Locust	32.7333	14.9333
1776	Desert Locust	26.1667	15.1667
1777	Desert Locust	36.5667	15.4833
1778	Desert Locust	32.3167	14
1779	Desert Locust	33.65	18.05
1780	Desert Locust	22.4225	15.4172
1781	Desert Locust	9.11667	18.95
1782	Desert Locust	9.3	18.8
1783	Desert Locust	9.13333	18.75
1784	Desert Locust	9.5	18.7667
1785	Desert Locust	9.21667	18.85
1786	Desert Locust	9.45	18.3167
1787	Desert Locust	9.45	18.35
1788	Desert Locust	71.5833	30.9667
1789	Desert Locust	70	27.75
1790	Desert Locust	67.2333	26.3
1791	Desert Locust	69.4	24.3333
1792	Desert Locust	70.9333	24.5667
1793	Desert Locust	68.8486	27.6908
1794	Desert Locust	71.6781	28.0836
1795	Desert Locust	48.55	11.2833
1796	Desert Locust	35.8333	20.3167
1797	Desert Locust	35.8333	20.4667
1798	Desert Locust	38.5833	17.25
1799	Desert Locust	3.83333	18.1333
1800	Desert Locust	4.16667	18.05
1801	Desert Locust	4	18.35
1802	Desert Locust	2.46667	17.5333
1803	Desert Locust	20.9	15.8131
1804	Desert Locust	41.1167	19.15
1805	Desert Locust	6.08333	17.95
1806	Desert Locust	-12.6667	22.5333
1807	Desert Locust	-11.0167	18.5833
1808	Desert Locust	2.47389	27.1939
1809	Desert Locust	1.56667	27.0167
1810	Desert Locust	1.07306	26.9581
1811	Desert Locust	5.18111	22.9761
1812	Desert Locust	0.35	29.3333
1813	Desert Locust	9.3	18.3333
1814	Desert Locust	8.91667	18.0833
1815	Desert Locust	9.3	18.2167
1816	Desert Locust	9.25	18.3
1817	Desert Locust	9.33333	18.2833
1818	Desert Locust	9.01667	18.4833
1819	Desert Locust	9.03333	18.45
1820	Desert Locust	-15.9617	18.1008
1821	Desert Locust	32.5333	15.6
1822	Desert Locust	41.9167	19.75
1823	Desert Locust	42	21
1824	Desert Locust	70.7803	27.8686
1825	Desert Locust	70.55	25.0333
1826	Desert Locust	70.1	27.7167
1827	Desert Locust	71.5	26.5
1828	Desert Locust	70.95	27.75
1829	Desert Locust	2.53333	17.6333
1830	Desert Locust	2.48333	17.95
1831	Desert Locust	38.7167	17.5
1832	Desert Locust	39.55	12.9833
1833	Desert Locust	36.5833	15.6
1834	Desert Locust	36.6667	15.7
1835	Desert Locust	35.35	15.2833
1836	Desert Locust	20.9	15.8706
1837	Desert Locust	20.9	15.8525
1838	Desert Locust	20.965	15.8333
1839	Desert Locust	21.0772	15.8333
1840	Desert Locust	20.8228	15.915
1841	Desert Locust	40.5	13
1842	Desert Locust	46.2833	14.6167
1843	Desert Locust	46.3833	14.8667
1844	Desert Locust	46.3	14.9167
1845	Desert Locust	46.0833	14.9
1846	Desert Locust	46.25	14.6167
1847	Desert Locust	46.3333	14.8667
1848	Desert Locust	46.8167	14.9833
1849	Desert Locust	45.2167	13.2333
1850	Desert Locust	45.9167	14.9167
1851	Desert Locust	46.65	13.55
1852	Desert Locust	46.5	14.5
1853	Desert Locust	46.5	14.5167
1854	Desert Locust	46.55	14.7833
1855	Desert Locust	38.4531	15.7731
1856	Desert Locust	37.2511	15.6161
1857	Desert Locust	38.0833	16.1833
1858	Desert Locust	37.8833	18.3
1859	Desert Locust	34.9167	17.1
1860	Desert Locust	34.4333	17.3
1861	Desert Locust	35	17.1667
1862	Desert Locust	34.4167	17.6667
1863	Desert Locust	39.2831	15.84
1864	Desert Locust	9.5	31
1865	Desert Locust	38.7667	16.95
1866	Desert Locust	39	13.5
1867	Desert Locust	36.6333	17.05
1868	Desert Locust	31.6667	14.7378
1869	Desert Locust	34.4333	16.4667
1870	Desert Locust	35.7833	17.7
1871	Desert Locust	23.15	15
1872	Desert Locust	36.5667	15.45
1873	Desert Locust	36.0667	16.9167
1874	Desert Locust	35.4	14.0333
1875	Desert Locust	35.9167	16.8333
1876	Desert Locust	32.9167	17.5833
1877	Desert Locust	31.6833	16.0667
1878	Desert Locust	31.3167	15.25
1879	Desert Locust	35.6167	18.7833
1880	Desert Locust	72.2917	26.3278
1881	Desert Locust	75.9833	28.1
1882	Desert Locust	71.7153	27.0222
1883	Desert Locust	71.3167	27.0833
1884	Desert Locust	72.5167	28.5
1885	Desert Locust	72.5167	28.0833
1886	Desert Locust	0.08333	16.9
1887	Desert Locust	34.1833	16.1833
1888	Desert Locust	31.6667	14.3333
1889	Desert Locust	31.6833	14.2683
1890	Desert Locust	72.5333	27.8
1891	Desert Locust	72.8167	24.7833
1892	Desert Locust	72.1333	27.0333
1893	Desert Locust	71.05	24.7167
1894	Desert Locust	72.7167	27.2167
1895	Desert Locust	72.2667	27.1
1896	Desert Locust	72.7333	27.55
1897	Desert Locust	32.9167	17.6667
1898	Desert Locust	34.5	16.5
1899	Desert Locust	-0.051	16.2731
1900	Desert Locust	46.4167	14.8333
1901	Desert Locust	46.4167	14.7833
1902	Desert Locust	21.1	15.85
1903	Desert Locust	21.2506	16.1347
1904	Desert Locust	21.3744	14.5339
1905	Desert Locust	22.0872	14.5128
1906	Desert Locust	20.8833	14.6333
1907	Desert Locust	4.58333	18.25
1908	Desert Locust	-12.3	19.8333
1909	Desert Locust	-11.5833	24.15
1910	Desert Locust	-13.4167	19.95
1911	Desert Locust	-12.75	22.6167
1912	Desert Locust	21.25	16.1978
1913	Desert Locust	20.9844	15.8408
1914	Desert Locust	21.0194	15.9217
1915	Desert Locust	22.1422	16.9683
1916	Desert Locust	22.0511	16.8481
1917	Desert Locust	6.56667	17.85
1918	Desert Locust	5.98333	17.3333
1919	Desert Locust	41.0553	20.2319
1920	Desert Locust	38.8631	14.6653
1921	Desert Locust	36.7	14.6
1922	Desert Locust	38.5	15
1923	Desert Locust	38.8167	14.45
1924	Desert Locust	39.3825	14.1764
1925	Desert Locust	39.0667	15.8333
1926	Desert Locust	20.8667	14.7167
1927	Desert Locust	21.8333	15.55
1928	Desert Locust	21.4333	15.1333
1929	Desert Locust	10	32
1930	Desert Locust	4.5	22.7833
1931	Desert Locust	2.9	24.2333
1932	Desert Locust	70.8333	24.8333
1933	Desert Locust	70.9833	27.75
1934	Desert Locust	66.4678	25.9497
1935	Desert Locust	66.75	25.3333
1936	Desert Locust	69.9667	25.9167
1937	Desert Locust	33.15	17.75
1938	Desert Locust	33.25	16.6167
1939	Desert Locust	36.5833	15.4833
1940	Desert Locust	2	20
1941	Desert Locust	20.9856	15.9028
1942	Desert Locust	3.93333	18.35
1943	Desert Locust	20.815	15.8333
1944	Desert Locust	20.9647	15.7819
1945	Desert Locust	41.9167	19.6667
1946	Desert Locust	42.7339	18.3061
1947	Desert Locust	42.5083	18.2203
1948	Desert Locust	46.5333	13.5
1949	Desert Locust	37.2667	28.0333
1950	Desert Locust	-15.45	16.75
1951	Desert Locust	-11.95	23.2
1952	Desert Locust	-0.143	27.1189
1953	Desert Locust	-8.15194	27.67
1954	Desert Locust	5.7	19.5333
1955	Desert Locust	0.164	26.7161
1956	Desert Locust	4.33333	23.3667
1957	Desert Locust	4.58333	22.75
1958	Desert Locust	4.3	22.9167
1959	Desert Locust	3.65	22.7
1960	Desert Locust	4.23333	22.95
1961	Desert Locust	8.25	19.55
1962	Desert Locust	23.6333	15.5
1963	Desert Locust	23.5	15.3833
1964	Desert Locust	23.5167	15.55
1965	Desert Locust	23.4833	15.2833
1966	Desert Locust	-16	17.25
1967	Desert Locust	4.66667	18.0833
1968	Desert Locust	4.53333	18.4167
1969	Desert Locust	5.08333	18.6
1970	Desert Locust	7.53333	19.5833
1971	Desert Locust	7.66667	19.1667
1972	Desert Locust	1.75	18.5333
1973	Desert Locust	7.71667	19.65
1974	Desert Locust	7.85	19.0333
1975	Desert Locust	7.81667	19.15
1976	Desert Locust	7.61667	19.1167
1977	Desert Locust	5.08333	18.4167
1978	Desert Locust	6.7	17.3667
1979	Desert Locust	7.79528	18.3864
1980	Desert Locust	7.26806	18.5197
1981	Desert Locust	6.75	19.1333
1982	Desert Locust	6.96667	19.0333
1983	Desert Locust	6.33333	18.1833
1984	Desert Locust	7.35	19.45
1985	Desert Locust	7.28333	19.4167
1986	Desert Locust	6.38333	18.9333
1987	Desert Locust	43.0614	16.4108
1988	Desert Locust	4.75	18.2
1989	Desert Locust	4.46667	18.1333
1990	Desert Locust	4.5	18.45
1991	Desert Locust	4.46667	18.3
1992	Desert Locust	6.91667	18.95
1993	Desert Locust	6.38333	18.8333
1994	Desert Locust	-9.71111	16.6519
1995	Desert Locust	-11.8667	25.8667
1996	Desert Locust	70.35	25.7667
1997	Desert Locust	72.95	27.25
1998	Desert Locust	72.95	27.4667
1999	Desert Locust	-11.5833	23.4833
[truncated: 11,971 more rows]

## Sheet: Sample data for MaxEnt modeling
SPECIES	lon	lat
Desert Locust	41.25	-1.75
Desert Locust	41.25	-1.25
Desert Locust	47.75	8.25
Desert Locust	48.25	8.25
Desert Locust	49.75	8.25
Desert Locust	40.75	8.75
Desert Locust	48.75	8.75
Desert Locust	49.75	8.75
Desert Locust	42.25	9.25
Desert Locust	43.75	9.25
Desert Locust	44.25	9.25
Desert Locust	45.25	9.25
Desert Locust	46.75	9.25
Desert Locust	48.75	9.25
Desert Locust	49.25	9.25
Desert Locust	38.75	9.75
Desert Locust	41.25	9.75
Desert Locust	41.75	9.75
Desert Locust	42.75	9.75
Desert Locust	43.25	9.75
Desert Locust	43.75	9.75
Desert Locust	44.75	9.75
Desert Locust	45.25	9.75
Desert Locust	45.75	9.75
Desert Locust	46.25	9.75
Desert Locust	46.75	9.75
Desert Locust	47.25	9.75
Desert Locust	48.25	9.75
Desert Locust	38.75	10.25
Desert Locust	42.25	10.25
Desert Locust	42.75	10.25
Desert Locust	43.25	10.25
Desert Locust	43.75	10.25
Desert Locust	44.25	10.25
Desert Locust	44.75	10.25
Desert Locust	45.25	10.25
Desert Locust	45.75	10.25
Desert Locust	46.25	10.25
Desert Locust	47.25	10.25
Desert Locust	48.75	10.25
Desert Locust	49.25	10.25
Desert Locust	49.75	10.25
Desert Locust	50.25	10.25
Desert Locust	-6.25	10.75
Desert Locust	42.75	10.75
Desert Locust	43.25	10.75
Desert Locust	43.75	10.75
Desert Locust	45.75	10.75
Desert Locust	46.25	10.75
Desert Locust	46.75	10.75
Desert Locust	47.25	10.75
Desert Locust	47.75	10.75
Desert Locust	48.25	10.75
Desert Locust	48.75	10.75
Desert Locust	49.25	10.75
Desert Locust	49.75	10.75
Desert Locust	50.25	10.75
Desert Locust	-4.75	11.25
Desert Locust	2.25	11.25
Desert Locust	19.25	11.25
Desert Locust	29.75	11.25
Desert Locust	39.25	11.25
Desert Locust	42.25	11.25
Desert Locust	42.75	11.25
Desert Locust	43.25	11.25
Desert Locust	48.75	11.25
Desert Locust	49.25	11.25
Desert Locust	49.75	11.25
Desert Locust	50.25	11.25
Desert Locust	2.75	11.75
Desert Locust	21.25	11.75
Desert Locust	25.75	11.75
Desert Locust	39.75	11.75
Desert Locust	40.75	11.75
Desert Locust	41.25	11.75
Desert Locust	42.25	11.75
Desert Locust	42.75	11.75
Desert Locust	-15.75	12.25
Desert Locust	-15.25	12.25
Desert Locust	-8.75	12.25
Desert Locust	-6.75	12.25
Desert Locust	-3.25	12.25
Desert Locust	-2.25	12.25
Desert Locust	14.25	12.25
Desert Locust	29.25	12.25
Desert Locust	31.25	12.25
Desert Locust	33.75	12.25
Desert Locust	42.25	12.25
Desert Locust	42.75	12.25
Desert Locust	43.25	12.25
Desert Locust	-16.25	12.75
Desert Locust	-15.75	12.75
Desert Locust	-14.25	12.75
Desert Locust	-4.75	12.75
Desert Locust	-3.25	12.75
Desert Locust	-2.75	12.75
Desert Locust	-0.25	12.75
Desert Locust	15.75	12.75
Desert Locust	16.75	12.75
Desert Locust	24.75	12.75
Desert Locust	29.25	12.75
Desert Locust	34.75	12.75
Desert Locust	35.25	12.75
Desert Locust	36.25	12.75
Desert Locust	39.25	12.75
Desert Locust	39.75	12.75
Desert Locust	40.75	12.75
Desert Locust	43.75	12.75
Desert Locust	44.25	12.75
Desert Locust	-16.75	13.25
Desert Locust	-16.25	13.25
Desert Locust	-14.75	13.25
Desert Locust	-13.75	13.25
Desert Locust	-10.75	13.25
Desert Locust	-10.25	13.25
Desert Locust	-5.75	13.25
Desert Locust	-4.75	13.25
Desert Locust	-3.25	13.25
Desert Locust	-2.75	13.25
Desert Locust	2.25	13.25
Desert Locust	10.25	13.25
Desert Locust	11.25	13.25
Desert Locust	11.75	13.25
Desert Locust	12.25	13.25
Desert Locust	12.75	13.25
Desert Locust	14.75	13.25
Desert Locust	15.75	13.25
Desert Locust	16.25	13.25
Desert Locust	18.25	13.25
Desert Locust	19.75	13.25
Desert Locust	20.75	13.25
Desert Locust	21.25	13.25
Desert Locust	22.25	13.25
Desert Locust	25.25	13.25
Desert Locust	25.75	13.25
Desert Locust	27.25	13.25
Desert Locust	27.75	13.25
Desert Locust	29.75	13.25
Desert Locust	30.25	13.25
Desert Locust	39.25	13.25
Desert Locust	39.75	13.25
Desert Locust	40.75	13.25
Desert Locust	44.25	13.25
Desert Locust	44.75	13.25
Desert Locust	45.25	13.25
Desert Locust	-16.25	13.75
Desert Locust	-15.75	13.75
Desert Locust	-15.25	13.75
Desert Locust	-14.25	13.75
Desert Locust	-11.25	13.75
Desert Locust	-10.75	13.75
Desert Locust	-8.25	13.75
Desert Locust	-7.75	13.75
Desert Locust	-6.75	13.75
Desert Locust	-6.25	13.75
Desert Locust	-5.75	13.75
Desert Locust	-4.75	13.75
Desert Locust	-3.75	13.75
Desert Locust	-2.75	13.75
Desert Locust	-2.25	13.75
Desert Locust	1.75	13.75
Desert Locust	2.75	13.75
Desert Locust	4.25	13.75
Desert Locust	4.75	13.75
Desert Locust	5.25	13.75
Desert Locust	8.75	13.75
Desert Locust	9.75	13.75
Desert Locust	10.25	13.75
Desert Locust	10.75	13.75
Desert Locust	11.75	13.75
Desert Locust	12.25	13.75
Desert Locust	12.75	13.75
Desert Locust	13.25	13.75
Desert Locust	14.25	13.75
Desert Locust	14.75	13.75
Desert Locust	15.25	13.75
Desert Locust	15.75	13.75
Desert Locust	16.25	13.75
Desert Locust	18.75	13.75
Desert Locust	19.75	13.75
Desert Locust	20.25	13.75
Desert Locust	20.75	13.75
Desert Locust	22.25	13.75
Desert Locust	22.75	13.75
Desert Locust	24.25	13.75
Desert Locust	24.75	13.75
Desert Locust	25.25	13.75
Desert Locust	25.75	13.75
Desert Locust	26.25	13.75
Desert Locust	30.25	13.75
Desert Locust	31.25	13.75
Desert Locust	31.75	13.75
Desert Locust	32.25	13.75
Desert Locust	32.75	13.75
Desert Locust	33.75	13.75
Desert Locust	36.25	13.75
Desert Locust	39.25	13.75
Desert Locust	40.25	13.75
Desert Locust	40.75	13.75
Desert Locust	41.25	13.75
Desert Locust	41.75	13.75
Desert Locust	43.75	13.75
Desert Locust	44.25	13.75
Desert Locust	44.75	13.75
Desert Locust	45.25	13.75
Desert Locust	45.75	13.75
Desert Locust	46.25	13.75
Desert Locust	46.75	13.75
Desert Locust	47.25	13.75
Desert Locust	-16.75	14.25
Desert Locust	-16.25	14.25
Desert Locust	-15.75	14.25
Desert Locust	-13.25	14.25
Desert Locust	-12.75	14.25
Desert Locust	-11.75	14.25
Desert Locust	-11.25	14.25
Desert Locust	-10.25	14.25
Desert Locust	-9.75	14.25
Desert Locust	-9.25	14.25
Desert Locust	-8.25	14.25
Desert Locust	-7.75	14.25
Desert Locust	-7.25	14.25
Desert Locust	-6.25	14.25
Desert Locust	-5.75	14.25
Desert Locust	-5.25	14.25
Desert Locust	-4.75	14.25
Desert Locust	-4.25	14.25
Desert Locust	-1.75	14.25
Desert Locust	-1.25	14.25
Desert Locust	-0.25	14.25
Desert Locust	0.75	14.25
Desert Locust	1.25	14.25
Desert Locust	5.25	14.25
Desert Locust	5.75	14.25
Desert Locust	7.75	14.25
Desert Locust	9.25	14.25
Desert Locust	9.75	14.25
Desert Locust	10.25	14.25
Desert Locust	14.25	14.25
Desert Locust	14.75	14.25
Desert Locust	15.25	14.25
Desert Locust	15.75	14.25
Desert Locust	17.25	14.25
Desert Locust	17.75	14.25
Desert Locust	20.75	14.25
Desert Locust	21.25	14.25
Desert Locust	21.75	14.25
Desert Locust	22.25	14.25
Desert Locust	24.25	14.25
Desert Locust	24.75	14.25
Desert Locust	25.25	14.25
Desert Locust	25.75	14.25
Desert Locust	26.25	14.25
Desert Locust	27.75	14.25
Desert Locust	28.75	14.25
Desert Locust	29.25	14.25
Desert Locust	29.75	14.25
Desert Locust	30.25	14.25
Desert Locust	30.75	14.25
Desert Locust	31.25	14.25
Desert Locust	31.75	14.25
Desert Locust	32.25	14.25
Desert Locust	32.75	14.25
Desert Locust	33.75	14.25
Desert Locust	35.25	14.25
Desert Locust	35.75	14.25
Desert Locust	36.75	14.25
Desert Locust	38.25	14.25
Desert Locust	38.75	14.25
Desert Locust	39.25	14.25
Desert Locust	39.75	14.25
Desert Locust	43.25	14.25
Desert Locust	43.75	14.25
Desert Locust	44.25	14.25
Desert Locust	44.75	14.25
Desert Locust	45.75	14.25
Desert Locust	46.25	14.25
Desert Locust	46.75	14.25
Desert Locust	47.25	14.25
Desert Locust	47.75	14.25
Desert Locust	48.75	14.25
Desert Locust	-17.25	14.75
Desert Locust	-16.75	14.75
Desert Locust	-16.25	14.75
Desert Locust	-15.75	14.75
Desert Locust	-15.25	14.75
Desert Locust	-12.25	14.75
Desert Locust	-11.75	14.75
Desert Locust	-9.25	14.75
Desert Locust	-7.75	14.75
Desert Locust	-7.25	14.75
Desert Locust	-6.75	14.75
Desert Locust	-5.25	14.75
Desert Locust	-4.75	14.75
Desert Locust	-4.25	14.75
Desert Locust	-0.25	14.75
Desert Locust	0.75	14.75
Desert Locust	1.25	14.75
Desert Locust	2.25	14.75
Desert Locust	3.25	14.75
Desert Locust	4.25	14.75
Desert Locust	4.75	14.75
Desert Locust	5.25	14.75
Desert Locust	5.75	14.75
Desert Locust	6.25	14.75
Desert Locust	7.75	14.75
Desert Locust	8.75	14.75
Desert Locust	9.25	14.75
Desert Locust	9.75	14.75
Desert Locust	10.25	14.75
Desert Locust	13.75	14.75
Desert Locust	14.25	14.75
Desert Locust	14.75	14.75
Desert Locust	15.25	14.75
Desert Locust	15.75	14.75
Desert Locust	17.25	14.75
Desert Locust	17.75	14.75
Desert Locust	20.75	14.75
Desert Locust	21.25	14.75
Desert Locust	21.75	14.75
Desert Locust	22.25	14.75
Desert Locust	23.25	14.75
Desert Locust	23.75	14.75
Desert Locust	24.25	14.75
Desert Locust	24.75	14.75
Desert Locust	25.75	14.75
Desert Locust	26.25	14.75
Desert Locust	27.75	14.75
Desert Locust	28.25	14.75
Desert Locust	28.75	14.75
Desert Locust	29.25	14.75
Desert Locust	29.75	14.75
Desert Locust	30.25	14.75
Desert Locust	30.75	14.75
Desert Locust	31.25	14.75
Desert Locust	31.75	14.75
Desert Locust	32.25	14.75
Desert Locust	32.75	14.75
Desert Locust	33.25	14.75
Desert Locust	34.75	14.75
Desert Locust	35.25	14.75
Desert Locust	35.75	14.75
Desert Locust	36.75	14.75
Desert Locust	38.25	14.75
Desert Locust	38.75	14.75
Desert Locust	39.25	14.75
Desert Locust	39.75	14.75
Desert Locust	40.25	14.75
Desert Locust	43.25	14.75
Desert Locust	43.75	14.75
Desert Locust	44.25	14.75
Desert Locust	44.75	14.75
Desert Locust	45.25	14.75
Desert Locust	45.75	14.75
Desert Locust	46.25	14.75
Desert Locust	46.75	14.75
Desert Locust	47.25	14.75
Desert Locust	49.25	14.75
Desert Locust	-16.75	15.25
Desert Locust	-16.25	15.25
Desert Locust	-15.75	15.25
Desert Locust	-15.25	15.25
Desert Locust	-13.25	15.25
Desert Locust	-12.25	15.25
Desert Locust	-11.75	15.25
Desert Locust	-10.75	15.25
Desert Locust	-10.25	15.25
Desert Locust	-9.75	15.25
Desert Locust	-8.75	15.25
Desert Locust	-8.25	15.25
Desert Locust	-7.75	15.25
Desert Locust	-7.25	15.25
Desert Locust	-6.75	15.25
Desert Locust	-6.25	15.25
Desert Locust	-5.25	15.25
Desert Locust	-4.75	15.25
Desert Locust	-4.25	15.25
Desert Locust	-3.75	15.25
Desert Locust	-3.25	15.25
Desert Locust	-2.25	15.25
Desert Locust	-1.75	15.25
Desert Locust	-1.25	15.25
Desert Locust	-0.25	15.25
Desert Locust	2.25	15.25
Desert Locust	2.75	15.25
Desert Locust	3.25	15.25
Desert Locust	3.75	15.25
Desert Locust	4.75	15.25
Desert Locust	5.25	15.25
Desert Locust	8.75	15.25
Desert Locust	9.75	15.25
Desert Locust	10.25	15.25
Desert Locust	11.25	15.25
Desert Locust	11.75	15.25
Desert Locust	14.25	15.25
Desert Locust	16.25	15.25
Desert Locust	17.25	15.25
Desert Locust	20.25	15.25
Desert Locust	20.75	15.25
Desert Locust	21.25	15.25
Desert Locust	21.75	15.25
Desert Locust	22.25	15.25
Desert Locust	22.75	15.25
Desert Locust	23.25	15.25
Desert Locust	23.75	15.25
Desert Locust	24.25	15.25
Desert Locust	24.75	15.25
Desert Locust	26.25	15.25
Desert Locust	26.75	15.25
Desert Locust	28.25	15.25
Desert Locust	29.75	15.25
Desert Locust	30.25	15.25
Desert Locust	30.75	15.25
Desert Locust	31.25	15.25
Desert Locust	31.75	15.25
Desert Locust	32.25	15.25
Desert Locust	32.75	15.25
Desert Locust	33.25	15.25
Desert Locust	33.75	15.25
Desert Locust	34.75	15.25
Desert Locust	35.25	15.25
Desert Locust	35.75	15.25
Desert Locust	36.25	15.25
Desert Locust	36.75	15.25
Desert Locust	37.75	15.25
Desert Locust	38.25	15.25
Desert Locust	38.75	15.25
Desert Locust	39.25	15.25
Desert Locust	43.25	15.25
Desert Locust	43.75	15.25
Desert Locust	44.25	15.25
Desert Locust	45.25	15.25
Desert Locust	45.75	15.25
Desert Locust	46.25	15.25
Desert Locust	46.75	15.25
Desert Locust	47.25	15.25
Desert Locust	49.75	15.25
Desert Locust	50.25	15.25
Desert Locust	-16.25	15.75
Desert Locust	-15.75	15.75
Desert Locust	-15.25	15.75
Desert Locust	-14.75	15.75
Desert Locust	-13.75	15.75
Desert Locust	-13.25	15.75
Desert Locust	-12.75	15.75
Desert Locust	-12.25	15.75
Desert Locust	-11.75	15.75
Desert Locust	-11.25	15.75
Desert Locust	-10.75	15.75
Desert Locust	-10.25	15.75
Desert Locust	-9.75	15.75
Desert Locust	-9.25	15.75
Desert Locust	-8.75	15.75
Desert Locust	-8.25	15.75
Desert Locust	-7.75	15.75
Desert Locust	-7.25	15.75
Desert Locust	-6.25	15.75
Desert Locust	-5.75	15.75
Desert Locust	-5.25	15.75
Desert Locust	-4.75	15.75
Desert Locust	-4.25	15.75
Desert Locust	-3.75	15.75
Desert Locust	-3.25	15.75
Desert Locust	-2.75	15.75
Desert Locust	-2.25	15.75
Desert Locust	-1.75	15.75
Desert Locust	-1.25	15.75
Desert Locust	-0.25	15.75
Desert Locust	0.25	15.75
Desert Locust	0.75	15.75
Desert Locust	2.25	15.75
Desert Locust	3.25	15.75
Desert Locust	7.75	15.75
Desert Locust	8.75	15.75
Desert Locust	9.25	15.75
Desert Locust	9.75	15.75
Desert Locust	11.25	15.75
Desert Locust	17.75	15.75
Desert Locust	18.25	15.75
Desert Locust	19.25	15.75
Desert Locust	19.75	15.75
Desert Locust	20.25	15.75
Desert Locust	20.75	15.75
Desert Locust	21.25	15.75
Desert Locust	21.75	15.75
Desert Locust	22.75	15.75
Desert Locust	23.75	15.75
Desert Locust	24.75	15.75
Desert Locust	25.75	15.75
Desert Locust	26.25	15.75
Desert Locust	26.75	15.75
Desert Locust	28.25	15.75
Desert Locust	28.75	15.75
Desert Locust	29.75	15.75
Desert Locust	30.25	15.75
Desert Locust	30.75	15.75
Desert Locust	31.25	15.75
Desert Locust	31.75	15.75
Desert Locust	32.25	15.75
Desert Locust	32.75	15.75
Desert Locust	33.25	15.75
Desert Locust	33.75	15.75
Desert Locust	34.25	15.75
Desert Locust	36.25	15.75
Desert Locust	36.75	15.75
Desert Locust	37.25	15.75
Desert Locust	37.75	15.75
Desert Locust	38.25	15.75
Desert Locust	38.75	15.75
Desert Locust	39.25	15.75
Desert Locust	42.75	15.75
Desert Locust	43.25	15.75
Desert Locust	44.25	15.75
Desert Locust	44.75	15.75
Desert Locust	45.25	15.75
Desert Locust	45.75	15.75
Desert Locust	46.25	15.75
Desert Locust	46.75	15.75
Desert Locust	48.25	15.75
Desert Locust	48.75	15.75
Desert Locust	-16.25	16.25
Desert Locust	-15.75	16.25
Desert Locust	-15.25	16.25
Desert Locust	-14.75	16.25
Desert Locust	-14.25	16.25
Desert Locust	-13.75	16.25
Desert Locust	-13.25	16.25
Desert Locust	-12.75	16.25
Desert Locust	-12.25	16.25
Desert Locust	-11.75	16.25
Desert Locust	-11.25	16.25
Desert Locust	-10.75	16.25
Desert Locust	-10.25	16.25
Desert Locust	-9.75	16.25
Desert Locust	-9.25	16.25
Desert Locust	-8.75	16.25
Desert Locust	-8.25	16.25
Desert Locust	-7.75	16.25
Desert Locust	-7.25	16.25
Desert Locust	-6.75	16.25
Desert Locust	-6.25	16.25
Desert Locust	-5.75	16.25
Desert Locust	-5.25	16.25
Desert Locust	-4.75	16.25
Desert Locust	-4.25	16.25
Desert Locust	-3.75	16.25
Desert Locust	-3.25	16.25
Desert Locust	-2.75	16.25
Desert Locust	-1.75	16.25
Desert Locust	-1.25	16.25
Desert Locust	-0.75	16.25
Desert Locust	-0.25	16.25
Desert Locust	0.25	16.25
Desert Locust	0.75	16.25
Desert Locust	1.75	16.25
Desert Locust	2.25	16.25
Desert Locust	3.25	16.25
Desert Locust	4.25	16.25
Desert Locust	5.25	16.25
Desert Locust	6.25	16.25
Desert Locust	7.75	16.25
Desert Locust	8.25	16.25
Desert Locust	8.75	16.25
Desert Locust	9.25	16.25
Desert Locust	10.25	16.25
Desert Locust	14.75	16.25
Desert Locust	17.25	16.25
Desert Locust	20.75	16.25
Desert Locust	21.25	16.25
Desert Locust	21.75	16.25
Desert Locust	26.75	16.25
Desert Locust	28.75	16.25
Desert Locust	29.75	16.25
Desert Locust	30.75	16.25
Desert Locust	31.75	16.25
Desert Locust	32.25	16.25
Desert Locust	32.75	16.25
Desert Locust	33.25	16.25
Desert Locust	33.75	16.25
Desert Locust	34.25	16.25
Desert Locust	34.75	16.25
Desert Locust	35.25	16.25
Desert Locust	35.75	16.25
Desert Locust	36.25	16.25
Desert Locust	36.75	16.25
Desert Locust	37.25	16.25
Desert Locust	37.75	16.25
Desert Locust	38.25	16.25
Desert Locust	38.75	16.25
Desert Locust	43.25	16.25
Desert Locust	43.75	16.25
Desert Locust	44.25	16.25
Desert Locust	44.75	16.25
Desert Locust	45.25	16.25
Desert Locust	46.25	16.25
Desert Locust	47.75	16.25
Desert Locust	48.75	16.25
Desert Locust	-16.25	16.75
Desert Locust	-15.75	16.75
Desert Locust	-15.25	16.75
Desert Locust	-14.75	16.75
Desert Locust	-14.25	16.75
Desert Locust	-13.75	16.75
Desert Locust	-13.25	16.75
Desert Locust	-12.75	16.75
Desert Locust	-12.25	16.75
Desert Locust	-11.75	16.75
Desert Locust	-11.25	16.75
Desert Locust	-10.75	16.75
Desert Locust	-10.25	16.75
Desert Locust	-9.75	16.75
Desert Locust	-9.25	16.75
Desert Locust	-8.75	16.75
Desert Locust	-8.25	16.75
Desert Locust	-7.75	16.75
Desert Locust	-7.25	16.75
Desert Locust	-6.75	16.75
Desert Locust	-6.25	16.75
Desert Locust	-5.75	16.75
Desert Locust	-4.25	16.75
Desert Locust	-3.25	16.75
Desert Locust	-2.75	16.75
Desert Locust	-2.25	16.75
Desert Locust	-1.75	16.75
Desert Locust	-1.25	16.75
Desert Locust	-0.25	16.75
Desert Locust	0.25	16.75
Desert Locust	0.75	16.75
Desert Locust	1.75	16.75
Desert Locust	2.25	16.75
Desert Locust	2.75	16.75
Desert Locust	3.75	16.75
Desert Locust	4.25	16.75
Desert Locust	5.25	16.75
Desert Locust	5.75	16.75
Desert Locust	6.25	16.75
Desert Locust	6.75	16.75
Desert Locust	7.25	16.75
Desert Locust	7.75	16.75
Desert Locust	8.25	16.75
Desert Locust	8.75	16.75
Desert Locust	10.25	16.75
Desert Locust	18.75	16.75
Desert Locust	20.75	16.75
Desert Locust	21.25	16.75
Desert Locust	21.75	16.75
Desert Locust	22.25	16.75
Desert Locust	30.25	16.75
Desert Locust	32.25	16.75
Desert Locust	32.75	16.75
Desert Locust	33.25	16.75
Desert Locust	33.75	16.75
Desert Locust	34.25	16.75
Desert Locust	34.75	16.75
Desert Locust	35.25	16.75
Desert Locust	35.75	16.75
Desert Locust	36.25	16.75
Desert Locust	36.75	16.75
Desert Locust	37.25	16.75
Desert Locust	38.75	16.75
Desert Locust	42.75	16.75
Desert Locust	43.75	16.75
Desert Locust	44.75	16.75
Desert Locust	45.25	16.75
Desert Locust	53.25	16.75
Desert Locust	-15.75	17.25
Desert Locust	-15.25	17.25
Desert Locust	-14.75	17.25
Desert Locust	-14.25	17.25
Desert Locust	-13.75	17.25
Desert Locust	-13.25	17.25
Desert Locust	-12.75	17.25
Desert Locust	-12.25	17.25
Desert Locust	-11.75	17.25
Desert Locust	-11.25	17.25
Desert Locust	-10.75	17.25
Desert Locust	-10.25	17.25
Desert Locust	-9.75	17.25
Desert Locust	-9.25	17.25
Desert Locust	-8.75	17.25
Desert Locust	-8.25	17.25
Desert Locust	-7.75	17.25
Desert Locust	-7.25	17.25
Desert Locust	-6.75	17.25
Desert Locust	-6.25	17.25
Desert Locust	-5.75	17.25
Desert Locust	-5.25	17.25
Desert Locust	-0.25	17.25
Desert Locust	0.25	17.25
Desert Locust	0.75	17.25
Desert Locust	1.75	17.25
Desert Locust	2.25	17.25
Desert Locust	2.75	17.25
Desert Locust	3.25	17.25
Desert Locust	3.75	17.25
Desert Locust	4.25	17.25
Desert Locust	4.75	17.25
Desert Locust	5.25	17.25
Desert Locust	5.75	17.25
Desert Locust	6.25	17.25
Desert Locust	6.75	17.25
Desert Locust	7.25	17.25
Desert Locust	7.75	17.25
Desert Locust	8.25	17.25
Desert Locust	8.75	17.25
Desert Locust	9.25	17.25
Desert Locust	9.75	17.25
Desert Locust	18.75	17.25
Desert Locust	19.25	17.25
Desert Locust	20.25	17.25
Desert Locust	20.75	17.25
Desert Locust	21.25	17.25
Desert Locust	21.75	17.25
Desert Locust	22.25	17.25
Desert Locust	31.25	17.25
Desert Locust	32.75	17.25
Desert Locust	33.25	17.25
Desert Locust	33.75	17.25
Desert Locust	34.25	17.25
Desert Locust	34.75	17.25
Desert Locust	35.25	17.25
Desert Locust	35.75	17.25
Desert Locust	36.25	17.25
Desert Locust	36.75	17.25
Desert Locust	37.25	17.25
Desert Locust	37.75	17.25
Desert Locust	38.25	17.25
Desert Locust	38.75	17.25
Desert Locust	42.75	17.25
Desert Locust	43.25	17.25
Desert Locust	44.25	17.25
Desert Locust	49.75	17.25
Desert Locust	54.25	17.25
Desert Locust	-15.75	17.75
Desert Locust	-15.25	17.75
Desert Locust	-14.75	17.75
Desert Locust	-14.25	17.75
Desert Locust	-13.75	17.75
Desert Locust	-13.25	17.75
Desert Locust	-12.75	17.75
Desert Locust	-12.25	17.75
Desert Locust	-11.75	17.75
Desert Locust	-11.25	17.75
Desert Locust	-10.75	17.75
Desert Locust	-10.25	17.75
Desert Locust	-9.75	17.75
Desert Locust	-9.25	17.75
Desert Locust	-8.75	17.75
Desert Locust	-7.75	17.75
Desert Locust	-7.25	17.75
Desert Locust	-6.75	17.75
Desert Locust	-6.25	17.75
Desert Locust	-4.75	17.75
Desert Locust	0.25	17.75
Desert Locust	0.75	17.75
Desert Locust	1.25	17.75
Desert Locust	1.75	17.75
Desert Locust	2.25	17.75
Desert Locust	2.75	17.75
Desert Locust	3.25	17.75
Desert Locust	3.75	17.75
Desert Locust	4.25	17.75
Desert Locust	4.75	17.75
Desert Locust	5.25	17.75
Desert Locust	5.75	17.75
Desert Locust	6.25	17.75
Desert Locust	6.75	17.75
Desert Locust	7.25	17.75
Desert Locust	7.75	17.75
Desert Locust	8.25	17.75
Desert Locust	8.75	17.75
Desert Locust	9.25	17.75
Desert Locust	9.75	17.75
Desert Locust	17.25	17.75
Desert Locust	17.75	17.75
Desert Locust	18.25	17.75
Desert Locust	18.75	17.75
Desert Locust	19.25	17.75
Desert Locust	21.75	17.75
Desert Locust	30.25	17.75
Desert Locust	30.75	17.75
Desert Locust	32.25	17.75
Desert Locust	32.75	17.75
Desert Locust	33.25	17.75
Desert Locust	33.75	17.75
Desert Locust	34.25	17.75
Desert Locust	34.75	17.75
Desert Locust	35.25	17.75
Desert Locust	35.75	17.75
Desert Locust	36.25	17.75
Desert Locust	38.25	17.75
Desert Locust	42.25	17.75
Desert Locust	42.75	17.75
Desert Locust	54.25	17.75
Desert Locust	-15.75	18.25
Desert Locust	-15.25	18.25
Desert Locust	-14.75	18.25
Desert Locust	-14.25	18.25
Desert Locust	-13.75	18.25
Desert Locust	-13.25	18.25
Desert Locust	-12.75	18.25
Desert Locust	-12.25	18.25
Desert Locust	-11.75	18.25
Desert Locust	-11.25	18.25
Desert Locust	-10.75	18.25
Desert Locust	-10.25	18.25
Desert Locust	-9.75	18.25
Desert Locust	-9.25	18.25
Desert Locust	-8.75	18.25
Desert Locust	-1.25	18.25
Desert Locust	-0.25	18.25
Desert Locust	0.25	18.25
Desert Locust	0.75	18.25
Desert Locust	1.25	18.25
Desert Locust	1.75	18.25
Desert Locust	2.25	18.25
Desert Locust	2.75	18.25
Desert Locust	3.25	18.25
Desert Locust	3.75	18.25
Desert Locust	4.25	18.25
Desert Locust	4.75	18.25
Desert Locust	5.25	18.25
Desert Locust	5.75	18.25
Desert Locust	6.25	18.25
Desert Locust	6.75	18.25
Desert Locust	7.25	18.25
Desert Locust	7.75	18.25
Desert Locust	8.25	18.25
Desert Locust	8.75	18.25
Desert Locust	9.25	18.25
Desert Locust	9.75	18.25
Desert Locust	10.25	18.25
Desert Locust	11.75	18.25
Desert Locust	14.25	18.25
Desert Locust	18.25	18.25
Desert Locust	18.75	18.25
Desert Locust	19.25	18.25
Desert Locust	19.75	18.25
Desert Locust	21.75	18.25
Desert Locust	30.75	18.25
Desert Locust	31.75	18.25
Desert Locust	32.75	18.25
Desert Locust	33.25	18.25
Desert Locust	33.75	18.25
Desert Locust	34.25	18.25
Desert Locust	35.25	18.25
Desert Locust	35.75	18.25
Desert Locust	36.25	18.25
Desert Locust	36.75	18.25
Desert Locust	37.25	18.25
Desert Locust	37.75	18.25
Desert Locust	41.75	18.25
Desert Locust	42.25	18.25
Desert Locust	42.75	18.25
Desert Locust	-15.75	18.75
Desert Locust	-15.25	18.75
Desert Locust	-14.75	18.75
Desert Locust	-14.25	18.75
Desert Locust	-13.75	18.75
Desert Locust	-13.25	18.75
Desert Locust	-12.75	18.75
Desert Locust	-12.25	18.75
Desert Locust	-11.75	18.75
Desert Locust	-11.25	18.75
Desert Locust	-10.75	18.75
Desert Locust	-10.25	18.75
Desert Locust	-9.75	18.75
Desert Locust	-9.25	18.75
Desert Locust	-7.25	18.75
Desert Locust	-1.25	18.75
Desert Locust	-0.75	18.75
Desert Locust	-0.25	18.75
Desert Locust	0.25	18.75
Desert Locust	0.75	18.75
Desert Locust	1.25	18.75
Desert Locust	1.75	18.75
Desert Locust	2.25	18.75
Desert Locust	2.75	18.75
Desert Locust	3.25	18.75
Desert Locust	3.75	18.75
Desert Locust	4.25	18.75
Desert Locust	4.75	18.75
Desert Locust	5.25	18.75
Desert Locust	5.75	18.75
Desert Locust	6.25	18.75
Desert Locust	6.75	18.75
Desert Locust	7.25	18.75
Desert Locust	7.75	18.75
Desert Locust	8.25	18.75
Desert Locust	8.75	18.75
Desert Locust	9.25	18.75
Desert Locust	9.75	18.75
Desert Locust	12.75	18.75
Desert Locust	17.25	18.75
Desert Locust	17.75	18.75
Desert Locust	18.75	18.75
Desert Locust	20.25	18.75
Desert Locust	20.75	18.75
Desert Locust	21.75	18.75
Desert Locust	22.25	18.75
Desert Locust	24.25	18.75
Desert Locust	28.25	18.75
Desert Locust	31.75	18.75
Desert Locust	32.25	18.75
Desert Locust	33.75	18.75
Desert Locust	34.75	18.75
Desert Locust	35.25	18.75
Desert Locust	35.75	18.75
Desert Locust	36.25	18.75
Desert Locust	36.75	18.75
Desert Locust	37.25	18.75
Desert Locust	41.25	18.75
Desert Locust	41.75	18.75
Desert Locust	42.25	18.75
Desert Locust	42.75	18.75
Desert Locust	44.25	18.75
Desert Locust	-16.25	19.25
Desert Locust	-15.75	19.25
Desert Locust	-15.25	19.25
Desert Locust	-14.75	19.25
Desert Locust	-14.25	19.25
Desert Locust	-13.75	19.25
Desert Locust	-13.25	19.25
Desert Locust	-12.75	19.25
Desert Locust	-12.25	19.25
Desert Locust	-11.75	19.25
Desert Locust	-11.25	19.25
Desert Locust	-7.25	19.25
Desert Locust	-2.75	19.25
Desert Locust	-2.25	19.25
Desert Locust	-1.25	19.25
Desert Locust	-0.75	19.25
Desert Locust	-0.25	19.25
Desert Locust	0.25	19.25
Desert Locust	0.75	19.25
Desert Locust	1.25	19.25
Desert Locust	1.75	19.25
Desert Locust	2.25	19.25
Desert Locust	2.75	19.25
Desert Locust	3.25	19.25
Desert Locust	3.75	19.25
Desert Locust	4.25	19.25
Desert Locust	4.75	19.25
Desert Locust	5.25	19.25
Desert Locust	5.75	19.25
Desert Locust	6.25	19.25
Desert Locust	6.75	19.25
Desert Locust	7.25	19.25
Desert Locust	7.75	19.25
Desert Locust	8.25	19.25
Desert Locust	8.75	19.25
Desert Locust	9.25	19.25
Desert Locust	9.75	19.25
Desert Locust	12.75	19.25
Desert Locust	14.75	19.25
Desert Locust	16.75	19.25
Desert Locust	17.75	19.25
Desert Locust	18.25	19.25
Desert Locust	20.25	19.25
Desert Locust	20.75	19.25
Desert Locust	30.25	19.25
Desert Locust	31.75	19.25
Desert Locust	35.75	19.25
Desert Locust	36.25	19.25
Desert Locust	36.75	19.25
Desert Locust	37.25	19.25
Desert Locust	41.25	19.25
Desert Locust	41.75	19.25
Desert Locust	42.25	19.25
Desert Locust	-16.25	19.75
Desert Locust	-15.75	19.75
Desert Locust	-15.25	19.75
Desert Locust	-14.75	19.75
Desert Locust	-14.25	19.75
Desert Locust	-13.75	19.75
Desert Locust	-13.25	19.75
Desert Locust	-12.75	19.75
Desert Locust	-12.25	19.75
Desert Locust	-11.75	19.75
Desert Locust	-10.75	19.75
Desert Locust	-7.25	19.75
Desert Locust	-0.75	19.75
Desert Locust	-0.25	19.75
Desert Locust	0.25	19.75
Desert Locust	0.75	19.75
Desert Locust	1.25	19.75
Desert Locust	1.75	19.75
Desert Locust	2.25	19.75
Desert Locust	2.75	19.75
Desert Locust	3.25	19.75
Desert Locust	3.75	19.75
Desert Locust	4.25	19.75
Desert Locust	5.75	19.75
Desert Locust	7.25	19.75
Desert Locust	7.75	19.75
Desert Locust	8.25	19.75
Desert Locust	8.75	19.75
Desert Locust	9.25	19.75
Desert Locust	17.25	19.75
Desert Locust	17.75	19.75
Desert Locust	18.25	19.75
Desert Locust	18.75	19.75
Desert Locust	19.25	19.75
Desert Locust	36.25	19.75
Desert Locust	36.75	19.75
Desert Locust	37.25	19.75
Desert Locust	41.25	19.75
Desert Locust	41.75	19.75
Desert Locust	42.25	19.75
Desert Locust	-15.75	20.25
Desert Locust	-15.25	20.25
Desert Locust	-14.75	20.25
Desert Locust	-14.25	20.25
Desert Locust	-13.75	20.25
Desert Locust	-13.25	20.25
Desert Locust	-12.75	20.25
Desert Locust	-12.25	20.25
Desert Locust	-11.75	20.25
Desert Locust	-11.25	20.25
Desert Locust	-10.25	20.25
Desert Locust	-1.75	20.25
Desert Locust	-1.25	20.25
Desert Locust	-0.75	20.25
Desert Locust	-0.25	20.25
Desert Locust	0.25	20.25
Desert Locust	0.75	20.25
Desert Locust	1.25	20.25
Desert Locust	1.75	20.25
Desert Locust	2.25	20.25
Desert Locust	2.75	20.25
Desert Locust	3.25	20.25
Desert Locust	3.75	20.25
Desert Locust	8.25	20.25
Desert Locust	8.75	20.25
Desert Locust	9.25	20.25
Desert Locust	12.75	20.25
Desert Locust	16.25	20.25
Desert Locust	16.75	20.25
Desert Locust	17.25	20.25
Desert Locust	17.75	20.25
Desert Locust	18.25	20.25
Desert Locust	18.75	20.25
Desert Locust	19.25	20.25
Desert Locust	35.75	20.25
Desert Locust	36.25	20.25
Desert Locust	40.25	20.25
Desert Locust	40.75	20.25
Desert Locust	41.25	20.25
Desert Locust	41.75	20.25
Desert Locust	42.25	20.25
Desert Locust	42.75	20.25
Desert Locust	45.25	20.25
Desert Locust	-15.75	20.75
Desert Locust	-15.25	20.75
Desert Locust	-14.75	20.75
Desert Locust	-14.25	20.75
Desert Locust	-13.75	20.75
Desert Locust	-13.25	20.75
Desert Locust	-12.75	20.75
Desert Locust	-12.25	20.75
Desert Locust	-11.75	20.75
Desert Locust	-11.25	20.75
Desert Locust	-10.75	20.75
Desert Locust	-0.75	20.75
Desert Locust	-0.25	20.75
Desert Locust	0.25	20.75
Desert Locust	0.75	20.75
Desert Locust	1.25	20.75
Desert Locust	1.75	20.75
Desert Locust	2.25	20.75
Desert Locust	2.75	20.75
Desert Locust	3.75	20.75
Desert Locust	5.25	20.75
Desert Locust	12.25	20.75
Desert Locust	16.25	20.75
Desert Locust	16.75	20.75
Desert Locust	30.25	20.75
Desert Locust	30.75	20.75
Desert Locust	35.75	20.75
Desert Locust	36.25	20.75
Desert Locust	39.75	20.75
Desert Locust	40.25	20.75
Desert Locust	40.75	20.75
Desert Locust	41.75	20.75
Desert Locust	42.25	20.75
Desert Locust	45.25	20.75
Desert Locust	-16.75	21.25
Desert Locust	-16.25	21.25
Desert Locust	-15.75	21.25
Desert Locust	-15.25	21.25
Desert Locust	-14.75	21.25
Desert Locust	-14.25	21.25
Desert Locust	-13.75	21.25
Desert Locust	-13.25	21.25
Desert Locust	-12.75	21.25
Desert Locust	-12.25	21.25
Desert Locust	-11.75	21.25
Desert Locust	-11.25	21.25
Desert Locust	-10.75	21.25
Desert Locust	-0.25	21.25
Desert Locust	0.75	21.25
Desert Locust	1.25	21.25
Desert Locust	1.75	21.25
Desert Locust	2.25	21.25
Desert Locust	3.75	21.25
Desert Locust	6.25	21.25
Desert Locust	12.25	21.25
Desert Locust	16.75	21.25
Desert Locust	17.25	21.25
Desert Locust	24.25	21.25
Desert Locust	24.75	21.25
Desert Locust	35.75	21.25
Desert Locust	36.25	21.25
Desert Locust	39.25	21.25
Desert Locust	39.75	21.25
Desert Locust	40.25	21.25
Desert Locust	40.75	21.25
Desert Locust	41.75	21.25
Desert Locust	42.25	21.25
Desert Locust	42.75	21.25
Desert Locust	-16.75	21.75
Desert Locust	-16.25	21.75
Desert Locust	-15.25	21.75
Desert Locust	-14.75	21.75
Desert Locust	-14.25	21.75
Desert Locust	-13.25	21.75
Desert Locust	-12.75	21.75
Desert Locust	-12.25	21.75
Desert Locust	-11.75	21.75
Desert Locust	-11.25	21.75
Desert Locust	-10.75	21.75
Desert Locust	-9.75	21.75
Desert Locust	1.25	21.75
Desert Locust	2.25	21.75
Desert Locust	2.75	21.75
Desert Locust	3.75	21.75
Desert Locust	4.25	21.75
Desert Locust	4.75	21.75
Desert Locust	19.25	21.75
Desert Locust	24.25	21.75
Desert Locust	24.75	21.75
Desert Locust	26.25	21.75
Desert Locust	31.25	21.75
Desert Locust	35.25	21.75
Desert Locust	35.75	21.75
Desert Locust	36.25	21.75
Desert Locust	36.75	21.75
Desert Locust	39.25	21.75
Desert Locust	39.75	21.75
Desert Locust	40.25	21.75
Desert Locust	40.75	21.75
Desert Locust	46.25	21.75
Desert Locust	56.25	21.75
Desert Locust	57.75	21.75
Desert Locust	58.75	21.75
Desert Locust	59.25	21.75
Desert Locust	-14.75	22.25
Desert Locust	-14.25	22.25
Desert Locust	-12.75	22.25
Desert Locust	-12.25	22.25
Desert Locust	-11.75	22.25
Desert Locust	-11.25	22.25
Desert Locust	-10.25	22.25
Desert Locust	-9.75	22.25
Desert Locust	-8.75	22.25
Desert Locust	2.25	22.25
Desert Locust	3.25	22.25
Desert Locust	3.75	22.25
Desert Locust	4.25	22.25
Desert Locust	4.75	22.25
Desert Locust	6.75	22.25
Desert Locust	12.25	22.25
Desert Locust	24.75	22.25
Desert Locust	28.75	22.25
Desert Locust	31.25	22.25
Desert Locust	31.75	22.25
Desert Locust	32.25	22.25
Desert Locust	32.75	22.25
Desert Locust	33.25	22.25
Desert Locust	33.75	22.25
Desert Locust	34.75	22.25
Desert Locust	35.25	22.25
Desert Locust	35.75	22.25
Desert Locust	36.25	22.25
Desert Locust	39.25	22.25
Desert Locust	39.75	22.25
Desert Locust	40.75	22.25
Desert Locust	41.75	22.25
Desert Locust	45.75	22.25
Desert Locust	46.75	22.25
Desert Locust	57.25	22.25
Desert Locust	57.75	22.25
Desert Locust	58.25	22.25
Desert Locust	58.75	22.25
Desert Locust	59.25	22.25
Desert Locust	59.75	22.25
Desert Locust	69.25	22.25
Desert Locust	-16.25	22.75
Desert Locust	-15.25	22.75
Desert Locust	-14.25	22.75
Desert Locust	-13.25	22.75
Desert Locust	-12.75	22.75
Desert Locust	-12.25	22.75
Desert Locust	-11.75	22.75
Desert Locust	-11.25	22.75
Desert Locust	-10.75	22.75
Desert Locust	-10.25	22.75
Desert Locust	-9.75	22.75
Desert Locust	1.75	22.75
Desert Locust	2.25	22.75
Desert Locust	2.75	22.75
Desert Locust	3.25	22.75
Desert Locust	3.75	22.75
Desert Locust	4.25	22.75
Desert Locust	4.75	22.75
Desert Locust	5.25	22.75
Desert Locust	5.75	22.75
Desert Locust	15.75	22.75
Desert Locust	28.75	22.75
Desert Locust	31.75	22.75
Desert Locust	32.25	22.75
Desert Locust	32.75	22.75
Desert Locust	33.25	22.75
Desert Locust	34.75	22.75
Desert Locust	35.25	22.75
Desert Locust	35.75	22.75
Desert Locust	39.25	22.75
Desert Locust	40.75	22.75
Desert Locust	41.25	22.75
Desert Locust	46.75	22.75
Desert Locust	56.25	22.75
Desert Locust	56.75	22.75
Desert Locust	57.25	22.75
Desert Locust	58.25	22.75
Desert Locust	58.75	22.75
Desert Locust	-15.75	23.25
Desert Locust	-14.25	23.25
Desert Locust	-13.75	23.25
Desert Locust	-13.25	23.25
Desert Locust	-12.75	23.25
Desert Locust	-12.25	23.25
Desert Locust	-11.75	23.25
Desert Locust	-11.25	23.25
Desert Locust	-10.75	23.25
Desert Locust	-10.25	23.25
Desert Locust	-9.75	23.25
Desert Locust	-9.25	23.25
Desert Locust	-8.75	23.25
Desert Locust	-8.25	23.25
Desert Locust	-7.75	23.25
Desert Locust	2.25	23.25
Desert Locust	2.75	23.25
Desert Locust	3.25	23.25
Desert Locust	3.75	23.25
Desert Locust	4.25	23.25
Desert Locust	4.75	23.25
Desert Locust	5.25	23.25
Desert Locust	6.25	23.25
Desert Locust	7.25	23.25
Desert Locust	9.25	23.25
Desert Locust	32.75	23.25
Desert Locust	33.25	23.25
Desert Locust	33.75	23.25
Desert Locust	34.25	23.25
Desert Locust	34.75	23.25
Desert Locust	35.25	23.25
Desert Locust	38.75	23.25
Desert Locust	53.75	23.25
Desert Locust	55.75	23.25
Desert Locust	56.75	23.25
Desert Locust	57.25	23.25
Desert Locust	57.75	23.25
Desert Locust	58.25	23.25
Desert Locust	58.75	23.25
Desert Locust	69.25	23.25
Desert Locust	69.75	23.25
Desert Locust	72.75	23.25
Desert Locust	-15.75	23.75
Desert Locust	-14.25	23.75
Desert Locust	-13.75	23.75
Desert Locust	-13.25	23.75
Desert Locust	-12.75	23.75
Desert Locust	-12.25	23.75
Desert Locust	-11.75	23.75
Desert Locust	-11.25	23.75
Desert Locust	-10.75	23.75
Desert Locust	-9.25	23.75
Desert Locust	-8.75	23.75
Desert Locust	-8.25	23.75
Desert Locust	-7.75	23.75
Desert Locust	-7.25	23.75
Desert Locust	-6.75	23.75
Desert Locust	1.75	23.75
Desert Locust	2.25	23.75
Desert Locust	2.75	23.75
Desert Locust	3.25	23.75
Desert Locust	3.75	23.75
Desert Locust	4.25	23.75
Desert Locust	4.75	23.75
Desert Locust	5.25	23.75
Desert Locust	5.75	23.75
Desert Locust	6.25	23.75
Desert Locust	8.75	23.75
Desert Locust	9.25	23.75
Desert Locust	9.75	23.75
Desert Locust	10.25	23.75
Desert Locust	10.75	23.75
Desert Locust	25.25	23.75
Desert Locust	32.75	23.75
Desert Locust	33.75	23.75
Desert Locust	34.25	23.75
Desert Locust	34.75	23.75
Desert Locust	35.25	23.75
Desert Locust	38.75	23.75
Desert Locust	42.75	23.75
Desert Locust	46.75	23.75
Desert Locust	51.75	23.75
Desert Locust	52.25	23.75
Desert Locust	53.75	23.75
Desert Locust	56.25	23.75
Desert Locust	57.25	23.75
Desert Locust	57.75	23.75
Desert Locust	69.25	23.75
Desert Locust	69.75	23.75
Desert Locust	-14.75	24.25
Desert Locust	-13.25	24.25
Desert Locust	-12.25	24.25
Desert Locust	-11.75	24.25
Desert Locust	-11.25	24.25
Desert Locust	-10.75	24.25
Desert Locust	-9.75	24.25
Desert Locust	-9.25	24.25
Desert Locust	-8.75	24.25
Desert Locust	-8.25	24.25
Desert Locust	-7.75	24.25
Desert Locust	-7.25	24.25
Desert Locust	-6.75	24.25
Desert Locust	-6.25	24.25
Desert Locust	1.25	24.25
Desert Locust	1.75	24.25
Desert Locust	2.25	24.25
Desert Locust	2.75	24.25
Desert Locust	3.25	24.25
Desert Locust	3.75	24.25
Desert Locust	4.25	24.25
Desert Locust	7.75	24.25
Desert Locust	8.75	24.25
Desert Locust	9.25	24.25
Desert Locust	9.75	24.25
Desert Locust	10.25	24.25
Desert Locust	10.75	24.25
Desert Locust	23.25	24.25
Desert Locust	33.75	24.25
Desert Locust	34.25	24.25
Desert Locust	34.75	24.25
Desert Locust	35.25	24.25
Desert Locust	38.25	24.25
Desert Locust	38.75	24.25
Desert Locust	39.75	24.25
Desert Locust	44.25	24.25
Desert Locust	45.25	24.25
Desert Locust	47.25	24.25
Desert Locust	49.25	24.25
Desert Locust	51.25	24.25
Desert Locust	55.75	24.25
Desert Locust	56.75	24.25
Desert Locust	69.25	24.25
Desert Locust	69.75	24.25
Desert Locust	70.25	24.25
Desert Locust	70.75	24.25
Desert Locust	71.25	24.25
Desert Locust	71.75	24.25
Desert Locust	72.25	24.25
Desert Locust	-14.75	24.75
Desert Locust	-14.25	24.75
Desert Locust	-12.75	24.75
Desert Locust	-11.75	24.75
Desert Locust	-11.25	24.75
Desert Locust	-10.75	24.75
Desert Locust	-9.75	24.75
Desert Locust	-9.25	24.75
Desert Locust	-8.75	24.75
Desert Locust	-8.25	24.75
Desert Locust	-7.75	24.75
Desert Locust	-7.25	24.75
Desert Locust	-6.75	24.75
Desert Locust	-6.25	24.75
Desert Locust	0.75	24.75
Desert Locust	1.25	24.75
Desert Locust	2.25	24.75
Desert Locust	2.75	24.75
Desert Locust	3.25	24.75
Desert Locust	4.25	24.75
Desert Locust	5.25	24.75
Desert Locust	8.25	24.75
Desert Locust	8.75	24.75
Desert Locust	9.25	24.75
Desert Locust	9.75	24.75
Desert Locust	10.25	24.75
Desert Locust	10.75	24.75
Desert Locust	20.25	24.75
Desert Locust	21.25	24.75
Desert Locust	22.25	24.75
Desert Locust	30.75	24.75
Desert Locust	34.25	24.75
Desert Locust	34.75	24.75
Desert Locust	37.25	24.75
Desert Locust	42.75	24.75
Desert Locust	44.25	24.75
Desert Locust	46.75	24.75
Desert Locust	69.25	24.75
Desert Locust	69.75	24.75
Desert Locust	70.25	24.75
Desert Locust	70.75	24.75
Desert Locust	71.25	24.75
Desert Locust	71.75	24.75
Desert Locust	72.25	24.75
Desert Locust	72.75	24.75
Desert Locust	-13.75	25.25
Desert Locust	-12.75	25.25
Desert Locust	-11.75	25.25
Desert Locust	-11.25	25.25
Desert Locust	-10.75	25.25
Desert Locust	-10.25	25.25
Desert Locust	-8.75	25.25
Desert Locust	-6.25	25.25
Desert Locust	-5.75	25.25
Desert Locust	-2.25	25.25
Desert Locust	1.25	25.25
Desert Locust	1.75	25.25
Desert Locust	2.25	25.25
Desert Locust	2.75	25.25
Desert Locust	3.25	25.25
Desert Locust	3.75	25.25
Desert Locust	7.75	25.25
Desert Locust	9.75	25.25
Desert Locust	10.25	25.25
Desert Locust	14.75	25.25
Desert Locust	29.25	25.25
Desert Locust	29.75	25.25
Desert Locust	32.25	25.25
Desert Locust	33.25	25.25
Desert Locust	33.75	25.25
Desert Locust	34.75	25.25
Desert Locust	37.25	25.25
Desert Locust	38.25	25.25
Desert Locust	44.75	25.25
Desert Locust	56.25	25.25
Desert Locust	61.25	25.25
Desert Locust	61.75	25.25
Desert Locust	62.25	25.25
Desert Locust	63.25	25.25
Desert Locust	66.75	25.25
Desert Locust	67.25	25.25
Desert Locust	69.25	25.25
Desert Locust	69.75	25.25
Desert Locust	70.25	25.25
Desert Locust	70.75	25.25
Desert Locust	71.25	25.25
Desert Locust	71.75	25.25
Desert Locust	72.25	25.25
Desert Locust	72.75	25.25
Desert Locust	73.75	25.25
Desert Locust	-11.75	25.75
Desert Locust	-11.25	25.75
Desert Locust	-10.75	25.75
Desert Locust	-10.25	25.75
Desert Locust	-9.25	25.75
Desert Locust	-8.75	25.75
Desert Locust	-7.75	25.75
Desert Locust	-5.75	25.75
Desert Locust	-5.25	25.75
Desert Locust	1.25	25.75
Desert Locust	2.25	25.75
Desert Locust	2.75	25.75
Desert Locust	3.25	25.75
Desert Locust	3.75	25.75
Desert Locust	6.75	25.75
Desert Locust	7.75	25.75
Desert Locust	13.75	25.75
Desert Locust	21.25	25.75
Desert Locust	21.75	25.75
Desert Locust	22.25	25.75
Desert Locust	28.75	25.75
Desert Locust	38.75	25.75
Desert Locust	39.25	25.75
Desert Locust	40.25	25.75
Desert Locust	40.75	25.75
Desert Locust	42.75	25.75
Desert Locust	43.25	25.75
Desert Locust	48.75	25.75
Desert Locust	56.25	25.75
Desert Locust	57.75	25.75
Desert Locust	58.25	25.75
Desert Locust	59.25	25.75
Desert Locust	59.75	25.75
Desert Locust	60.25	25.75
Desert Locust	60.75	25.75
Desert Locust	61.25	25.75
Desert Locust	61.75	25.75
Desert Locust	62.25	25.75
Desert Locust	62.75	25.75
Desert Locust	63.25	25.75
Desert Locust	63.75	25.75
Desert Locust	64.25	25.75
Desert Locust	64.75	25.75
Desert Locust	65.25	25.75
Desert Locust	65.75	25.75
Desert Locust	66.25	25.75
Desert Locust	66.75	25.75
Desert Locust	67.25	25.75
Desert Locust	67.75	25.75
Desert Locust	68.75	25.75
Desert Locust	69.25	25.75
Desert Locust	69.75	25.75
Desert Locust	70.25	25.75
Desert Locust	70.75	25.75
Desert Locust	71.25	25.75
Desert Locust	71.75	25.75
Desert Locust	72.25	25.75
Desert Locust	72.75	25.75
Desert Locust	74.25	25.75
Desert Locust	75.25	25.75
Desert Locust	-14.25	26.25
Desert Locust	-12.75	26.25
Desert Locust	-10.75	26.25
Desert Locust	-9.75	26.25
Desert Locust	-8.75	26.25
Desert Locust	-7.75	26.25
Desert Locust	-5.75	26.25
Desert Locust	-4.25	26.25
Desert Locust	0.25	26.25
Desert Locust	1.25	26.25
Desert Locust	1.75	26.25
Desert Locust	3.25	26.25
Desert Locust	3.75	26.25
Desert Locust	5.25	26.25
Desert Locust	6.25	26.25
Desert Locust	6.75	26.25
Desert Locust	7.25	26.25
Desert Locust	8.25	26.25
Desert Locust	9.25	26.25
Desert Locust	27.75	26.25
Desert Locust	36.75	26.25
Desert Locust	42.75	26.25
Desert Locust	43.75	26.25
Desert Locust	44.25	26.25
Desert Locust	44.75	26.25
Desert Locust	61.75	26.25
Desert Locust	62.25	26.25
Desert Locust	62.75	26.25
Desert Locust	63.25	26.25
Desert Locust	63.75	26.25
Desert Locust	64.25	26.25
Desert Locust	64.75	26.25
Desert Locust	65.25	26.25
Desert Locust	65.75	26.25
Desert Locust	66.25	26.25
Desert Locust	66.75	26.25
Desert Locust	67.25	26.25
Desert Locust	68.75	26.25
Desert Locust	69.25	26.25
Desert Locust	69.75	26.25
Desert Locust	70.25	26.25
Desert Locust	70.75	26.25
Desert Locust	71.25	26.25
Desert Locust	71.75	26.25
Desert Locust	72.25	26.25
Desert Locust	72.75	26.25
Desert Locust	73.25	26.25
Desert Locust	74.75	26.25
Desert Locust	-12.75	26.75
Desert Locust	-11.75	26.75
Desert Locust	-11.25	26.75
Desert Locust	-10.25	26.75
Desert Locust	-9.75	26.75
Desert Locust	-8.75	26.75
Desert Locust	-8.25	26.75
Desert Locust	-7.75	26.75
Desert Locust	-7.25	26.75
Desert Locust	-6.75	26.75
Desert Locust	-6.25	26.75
Desert Locust	-5.25	26.75
Desert Locust	-4.75	26.75
Desert Locust	-1.25	26.75
Desert Locust	-0.25	26.75
Desert Locust	0.25	26.75
Desert Locust	1.25	26.75
Desert Locust	3.75	26.75
Desert Locust	5.25	26.75
Desert Locust	6.25	26.75
Desert Locust	7.25	26.75
Desert Locust	8.25	26.75
Desert Locust	12.75	26.75
Desert Locust	36.25	26.75
Desert Locust	36.75	26.75
Desert Locust	37.75	26.75
Desert Locust	38.75	26.75
Desert Locust	49.25	26.75
Desert Locust	49.75	26.75
Desert Locust	55.75	26.75
Desert Locust	59.25	26.75
Desert Locust	62.75	26.75
Desert Locust	63.25	26.75
Desert Locust	63.75	26.75
Desert Locust	64.25	26.75
Desert Locust	64.75	26.75
Desert Locust	65.25	26.75
Desert Locust	65.75	26.75
Desert Locust	66.25	26.75
Desert Locust	66.75	26.75
Desert Locust	68.75	26.75
Desert Locust	69.25	26.75
Desert Locust	69.75	26.75
Desert Locust	70.25	26.75
Desert Locust	70.75	26.75
Desert Locust	71.25	26.75
Desert Locust	71.75	26.75
Desert Locust	72.25	26.75
Desert Locust	72.75	26.75
Desert Locust	73.25	26.75
Desert Locust	-13.25	27.25
Desert Locust	-12.75	27.25
Desert Locust	-9.75	27.25
Desert Locust	-8.75	27.25
Desert Locust	-8.25	27.25
Desert Locust	-7.75	27.25
Desert Locust	-7.25	27.25
Desert Locust	-2.25	27.25
Desert Locust	-0.25	27.25
Desert Locust	0.25	27.25
Desert Locust	1.25	27.25
Desert Locust	1.75	27.25
Desert Locust	2.25	27.25
Desert Locust	2.75	27.25
Desert Locust	3.25	27.25
Desert Locust	14.25	27.25
Desert Locust	28.25	27.25
Desert Locust	31.25	27.25
Desert Locust	36.25	27.25
Desert Locust	41.75	27.25
Desert Locust	46.75	27.25
Desert Locust	49.25	27.25
Desert Locust	53.25	27.25
Desert Locust	53.75	27.25
Desert Locust	54.75	27.25
Desert Locust	56.25	27.25
Desert Locust	58.25	27.25
Desert Locust	58.75	27.25
Desert Locust	59.25	27.25
Desert Locust	59.75	27.25
Desert Locust	60.25	27.25
Desert Locust	60.75	27.25
Desert Locust	61.25	27.25
Desert Locust	61.75	27.25
Desert Locust	62.25	27.25
Desert Locust	62.75	27.25
Desert Locust	63.75	27.25
Desert Locust	64.25	27.25
Desert Locust	64.75	27.25
Desert Locust	65.25	27.25
Desert Locust	65.75	27.25
Desert Locust	66.25	27.25
Desert Locust	66.75	27.25
Desert Locust	67.75	27.25
Desert Locust	68.75	27.25
Desert Locust	69.25	27.25
Desert Locust	69.75	27.25
Desert Locust	70.25	27.25
Desert Locust	70.75	27.25
Desert Locust	71.25	27.25
Desert Locust	71.75	27.25
Desert Locust	72.25	27.25
Desert Locust	72.75	27.25
Desert Locust	73.25	27.25
Desert Locust	73.75	27.25
Desert Locust	74.25	27.25
Desert Locust	74.75	27.25
Desert Locust	-11.25	27.75
Desert Locust	-10.75	27.75
Desert Locust	-8.25	27.75
Desert Locust	-6.75	27.75
Desert Locust	-0.75	27.75
Desert Locust	-0.25	27.75
Desert Locust	0.25	27.75
Desert Locust	0.75	27.75
Desert Locust	1.25	27.75
Desert Locust	3.25	27.75
Desert Locust	8.25	27.75
Desert Locust	21.75	27.75
Desert Locust	27.75	27.75
Desert Locust	35.75	27.75
Desert Locust	38.25	27.75
Desert Locust	38.75	27.75
Desert Locust	41.75	27.75
Desert Locust	47.75	27.75
Desert Locust	52.25	27.75
Desert Locust	54.25	27.75
Desert Locust	55.25	27.75
Desert Locust	55.75	27.75
Desert Locust	56.75	27.75
Desert Locust	57.75	27.75
Desert Locust	58.75	27.75
Desert Locust	63.25	27.75
Desert Locust	63.75	27.75
Desert Locust	64.25	27.75
Desert Locust	64.75	27.75
Desert Locust	65.25	27.75
Desert Locust	65.75	27.75
Desert Locust	66.25	27.75
Desert Locust	66.75	27.75
Desert Locust	67.25	27.75
Desert Locust	67.75	27.75
Desert Locust	68.25	27.75
Desert Locust	68.75	27.75
Desert Locust	69.25	27.75
Desert Locust	69.75	27.75
Desert Locust	70.25	27.75
Desert Locust	70.75	27.75
Desert Locust	71.25	27.75
Desert Locust	71.75	27.75
Desert Locust	72.25	27.75
Desert Locust	72.75	27.75
Desert Locust	73.25	27.75
Desert Locust	73.75	27.75
Desert Locust	74.25	27.75
Desert Locust	74.75	27.75
Desert Locust	-10.75	28.25
Desert Locust	-9.25	28.25
Desert Locust	-8.75	28.25
Desert Locust	-8.25	28.25
Desert Locust	-7.25	28.25
Desert Locust	-0.75	28.25
Desert Locust	-0.25	28.25
Desert Locust	0.25	28.25
Desert Locust	0.75	28.25
Desert Locust	1.25	28.25
Desert Locust	6.75	28.25
Desert Locust	9.25	28.25
Desert Locust	9.75	28.25
Desert Locust	28.75	28.25
Desert Locust	36.75	28.25
Desert Locust	37.25	28.25
Desert Locust	45.75	28.25
Desert Locust	62.75	28.25
Desert Locust	64.25	28.25
Desert Locust	64.75	28.25
Desert Locust	65.25	28.25
Desert Locust	65.75	28.25
Desert Locust	66.25	28.25
Desert Locust	69.25	28.25
Desert Locust	70.25	28.25
Desert Locust	70.75	28.25
Desert Locust	71.25	28.25
Desert Locust	71.75	28.25
Desert Locust	72.25	28.25
Desert Locust	72.75	28.25
Desert Locust	73.25	28.25
Desert Locust	73.75	28.25
Desert Locust	74.25	28.25
Desert Locust	74.75	28.25
Desert Locust	75.75	28.25
Desert Locust	76.25	28.25
Desert Locust	-10.75	28.75
Desert Locust	-10.25	28.75
Desert Locust	-8.25	28.75
Desert Locust	-7.75	28.75
Desert Locust	-7.25	28.75
Desert Locust	-6.75	28.75
Desert Locust	-6.25	28.75
Desert Locust	-5.75	28.75
Desert Locust	-5.25	28.75
Desert Locust	-2.75	28.75
Desert Locust	-2.25	28.75
Desert Locust	-1.75	28.75
Desert Locust	-0.25	28.75
Desert Locust	0.25	28.75
Desert Locust	2.75	28.75
Desert Locust	4.25	28.75
Desert Locust	4.75	28.75
Desert Locust	8.25	28.75
Desert Locust	10.25	28.75
Desert Locust	11.25	28.75
Desert Locust	38.25	28.75
Desert Locust	46.75	28.75
Desert Locust	48.25	28.75
Desert Locust	53.75	28.75
Desert Locust	54.75	28.75
Desert Locust	62.25	28.75
Desert Locust	63.25	28.75
Desert Locust	63.75	28.75
Desert Locust	64.25	28.75
Desert Locust	64.75	28.75
Desert Locust	65.25	28.75
Desert Locust	65.75	28.75
Desert Locust	66.75	28.75
Desert Locust	70.25	28.75
Desert Locust	70.75	28.75
Desert Locust	71.25	28.75
Desert Locust	71.75	28.75
Desert Locust	72.25	28.75
Desert Locust	72.75	28.75
Desert Locust	73.25	28.75
Desert Locust	73.75	28.75
Desert Locust	74.25	28.75
Desert Locust	75.25	28.75
Desert Locust	-9.75	29.25
Desert Locust	-9.25	29.25
Desert Locust	-8.75	29.25
Desert Locust	-8.25	29.25
Desert Locust	-7.75	29.25
Desert Locust	-7.25	29.25
Desert Locust	-6.75	29.25
Desert Locust	-5.75	29.25
Desert Locust	-5.25	29.25
Desert Locust	-4.75	29.25
Desert Locust	-4.25	29.25
Desert Locust	-3.75	29.25
Desert Locust	-3.25	29.25
Desert Locust	-2.75	29.25
Desert Locust	-2.25	29.25
Desert Locust	-1.75	29.25
Desert Locust	0.25	29.25
Desert Locust	2.75	29.25
Desert Locust	3.25	29.25
Desert Locust	4.25	29.25
Desert Locust	6.25	29.25
Desert Locust	6.75	29.25
Desert Locust	10.25	29.25
Desert Locust	25.75	29.25
Desert Locust	30.75	29.25
Desert Locust	35.75	29.25
Desert Locust	39.25	29.25
Desert Locust	46.75	29.25
Desert Locust	47.75	29.25
Desert Locust	57.25	29.25
Desert Locust	64.25	29.25
Desert Locust	64.75	29.25
Desert Locust	65.25	29.25
Desert Locust	65.75	29.25
Desert Locust	66.25	29.25
Desert Locust	70.25	29.25
Desert Locust	71.75	29.25
Desert Locust	72.25	29.25
Desert Locust	72.75	29.25
Desert Locust	73.25	29.25
Desert Locust	73.75	29.25
Desert Locust	74.25	29.25
Desert Locust	-9.75	29.75
Desert Locust	-7.75	29.75
Desert Locust	-7.25	29.75
Desert Locust	-6.75	29.75
Desert Locust	-6.25	29.75
Desert Locust	-5.25	29.75
Desert Locust	-4.75	29.75
Desert Locust	-4.25	29.75
Desert Locust	-3.75	29.75
Desert Locust	-3.25	29.75
Desert Locust	-2.75	29.75
Desert Locust	-2.25	29.75
Desert Locust	0.25	29.75
Desert Locust	2.25	29.75
Desert Locust	4.25	29.75
Desert Locust	31.25	29.75
Desert Locust	35.25	29.75
Desert Locust	39.75	29.75
Desert Locust	51.25	29.75
Desert Locust	52.75	29.75
Desert Locust	64.25	29.75
Desert Locust	65.25	29.75
Desert Locust	65.75	29.75
Desert Locust	66.25	29.75
Desert Locust	67.25	29.75
Desert Locust	69.25	29.75
Desert Locust	72.25	29.75
Desert Locust	73.75	29.75
Desert Locust	-8.25	30.25
Desert Locust	-7.75	30.25
Desert Locust	-7.25	30.25
Desert Locust	-6.75	30.25
Desert Locust	-5.75	30.25
Desert Locust	-5.25	30.25
Desert Locust	-4.75	30.25
Desert Locust	-4.25	30.25
Desert Locust	-3.75	30.25
Desert Locust	-3.25	30.25
Desert Locust	-2.75	30.25
Desert Locust	-2.25	30.25
Desert Locust	-1.75	30.25
Desert Locust	-1.25	30.25
Desert Locust	2.25	30.25
Desert Locust	2.75	30.25
Desert Locust	6.75	30.25
Desert Locust	9.25	30.25
Desert Locust	9.75	30.25
Desert Locust	11.75	30.25
Desert Locust	35.25	30.25
Desert Locust	36.25	30.25
Desert Locust	44.75	30.25
Desert Locust	47.75	30.25
Desert Locust	48.25	30.25
Desert Locust	49.75	30.25
Desert Locust	50.75	30.25
Desert Locust	66.75	30.25
Desert Locust	72.75	30.25
Desert Locust	-7.25	30.75
Desert Locust	-6.75	30.75
Desert Locust	-5.75	30.75
Desert Locust	-5.25	30.75
Desert Locust	-4.75	30.75
Desert Locust	-4.25	30.75
Desert Locust	-3.75	30.75
Desert Locust	-3.25	30.75
Desert Locust	-2.75	30.75
Desert Locust	-2.25	30.75
Desert Locust	-1.75	30.75
Desert Locust	2.75	30.75
Desert Locust	3.25	30.75
Desert Locust	6.25	30.75
Desert Locust	10.25	30.75
Desert Locust	49.25	30.75
Desert Locust	51.75	30.75
Desert Locust	71.75	30.75
Desert Locust	73.75	30.75
Desert Locust	-7.75	31.25
Desert Locust	-5.75	31.25
Desert Locust	-5.25	31.25
Desert Locust	-4.75	31.25
Desert Locust	-4.25	31.25
Desert Locust	-3.75	31.25
Desert Locust	-2.75	31.25
Desert Locust	-2.25	31.25
Desert Locust	-1.75	31.25
Desert Locust	0.75	31.25
Desert Locust	4.25	31.25
Desert Locust	5.25	31.25
Desert Locust	9.25	31.25
Desert Locust	9.75	31.25
Desert Locust	10.25	31.25
Desert Locust	10.75	31.25
Desert Locust	13.25	31.25
Desert Locust	27.25	31.25
Desert Locust	34.25	31.25
Desert Locust	35.75	31.25
Desert Locust	-7.25	31.75
Desert Locust	-5.75	31.75
Desert Locust	-5.25	31.75
Desert Locust	-4.75	31.75
Desert Locust	-4.25	31.75
Desert Locust	-3.75	31.75
Desert Locust	-3.25	31.75
Desert Locust	-2.75	31.75
Desert Locust	-2.25	31.75
Desert Locust	-1.75	31.75
Desert Locust	-0.25	31.75
Desert Locust	3.75	31.75
Desert Locust	4.25	31.75
Desert Locust	5.25	31.75
Desert Locust	9.75	31.75
Desert Locust	10.25	31.75
Desert Locust	10.75	31.75
Desert Locust	11.25	31.75
Desert Locust	12.75	31.75
Desert Locust	49.75	31.75
Desert Locust	-4.25	32.25
Desert Locust	-3.25	32.25
Desert Locust	-2.75	32.25
Desert Locust	-2.25	32.25
Desert Locust	-1.75	32.25
Desert Locust	-1.25	32.25
Desert Locust	-0.75	32.25
Desert Locust	0.25	32.25
Desert Locust	3.25	32.25
Desert Locust	3.75	32.25
Desert Locust	4.25	32.25
Desert Locust	9.75	32.25
Desert Locust	10.25	32.25
Desert Locust	58.75	32.25
Desert Locust	-3.25	32.75
Desert Locust	-2.25	32.75
Desert Locust	-1.75	32.75
Desert Locust	-0.75	32.75
Desert Locust	0.75	32.75
Desert Locust	2.75	32.75
Desert Locust	3.25	32.75
Desert Locust	3.75	32.75
Desert Locust	10.25	32.75
Desert Locust	43.25	32.75
Desert Locust	72.25	32.75
Desert Locust	74.25	32.75
Desert Locust	0.25	33.25
Desert Locust	1.25	33.25
Desert Locust	2.25	33.25
Desert Locust	6.25	33.25
Desert Locust	6.75	33.25
Desert Locust	1.25	33.75
Desert Locust	1.75	33.75
Desert Locust	2.25	33.75
Desert Locust	2.75	33.75
[truncated: 39 more rows]
